# Supplementary material for: From two-electron via four-electron to six-electron donor carbonyl groups in trinuclear derivatives of the oxophilic metal niobium
Source: Royal Society of Chemistry journal article supplement (doi:10.1039/b819180h), 2009-01-01
Supplement: b819180h.pdf [file b819180h.pdf]

# From Two-Electron via Four-Electron to Six-Electron Donor Carbonyl Groups in Trinuclear Derivatives of the Oxophilic Metal Niobium

Bin Peng,<sup>a</sup> Qian-Shu Li,<sup>\*a,b</sup> Yaoming Xie,<sup>c</sup> R. Bruce King,<sup>\*a,c</sup> and Henry F. Schaefer III<sup>c</sup>

<sup>a</sup>Center for Computational Quantum Chemistry, South China Normal University, Guangzhou, 510631 China

<sup>b</sup>Institute of Chemical Physics, Beijing Institute of Technology, Beijing 100081, China

<sup>c</sup>Department of Chemistry and Center for Computational Chemistry

University of Georgia, Athens, Georgia 30602, USA

e-mails: [rbking@chem.uga.edu](mailto:rbking@chem.uga.edu) and [qsli@scnu.edu.cn](mailto:qsli@scnu.edu.cn)

## Supporting Information

**Tables S1 to S26.** Coordinates of  $\text{Cp}_3\text{Nb}_3(\text{CO})_n$  ( $n = 9, 8, 7, 6$ ).

**Tables S27 to S39.** Harmonic vibrational frequencies ( $\text{cm}^{-1}$ ) and IR intensities ( $\text{km/mol}$ ) of  $\text{Cp}_3\text{Nb}_3(\text{CO})_n$  ( $n = 9, 8, 7, 6$ )

Table S1 Coordinates of  $\text{Cp}_3\text{Nb}_3(\text{CO})_9$  9-1  $C_3$

|    | MPW1PW91/SDD |           |           | MPW1PW91/LANL2DZ |           |           |
|----|--------------|-----------|-----------|------------------|-----------|-----------|
| Nb | 0.000000     | 1.940504  | -0.012369 | 0.000000         | 1.939229  | -0.010997 |
| Nb | 1.680526     | -0.970252 | -0.012369 | 1.679421         | -0.969614 | -0.010997 |
| Nb | -1.680526    | -0.970252 | -0.012369 | -1.679421        | -0.969614 | -0.010997 |
| C  | 1.530480     | -0.547520 | 2.052424  | 1.530538         | -0.543538 | 2.056940  |
| O  | 1.672147     | -0.445197 | 3.194148  | 1.678574         | -0.437133 | 3.197259  |
| C  | 0.543868     | -1.488697 | -1.700551 | 0.547976         | -1.490795 | -1.704293 |
| O  | 0.301518     | -1.920939 | -2.760069 | 0.305256         | -1.919920 | -2.763906 |
| C  | -1.239406    | -1.051675 | 2.052424  | -1.235987        | -1.053716 | 2.056940  |
| O  | -1.221625    | -1.225523 | 3.194148  | -1.217855        | -1.235121 | 3.197259  |
| C  | -1.561184    | 0.273345  | -1.700551 | -1.565054        | 0.270836  | -1.704293 |
| O  | -1.814341    | 0.699347  | -2.760069 | -1.815327        | 0.695600  | -2.763906 |
| C  | 1.017316     | 1.215352  | -1.700551 | 1.017078         | 1.219959  | -1.704293 |
| O  | 1.512823     | 1.221592  | -2.760069 | 1.510071         | 1.224319  | -2.763906 |
| C  | -0.291074    | 1.599194  | 2.052424  | -0.294551        | 1.597254  | 2.056940  |
| O  | -0.450522    | 1.670720  | 3.194148  | -0.460719        | 1.672254  | 3.197259  |
| C  | 1.913075     | 2.347862  | 0.617965  | 1.914562         | 2.348455  | 0.620893  |
| O  | 2.957864     | 2.706731  | 0.982853  | 2.958512         | 2.707052  | 0.986923  |
| C  | 1.076771     | -2.830703 | 0.617965  | 1.076541         | -2.832287 | 0.620893  |
| O  | 0.865166     | -3.914951 | 0.982853  | 0.865120         | -3.915672 | 0.986923  |
| C  | -2.989846    | 0.482841  | 0.617965  | -2.991103        | 0.483831  | 0.620893  |
| O  | -3.823029    | 1.208220  | 0.982853  | -3.823631        | 1.208621  | 0.986923  |
| C  | 0.188955     | 4.131034  | -0.883927 | 0.179875         | 4.135363  | -0.889092 |
| C  | -0.827384    | 3.496544  | -1.656167 | -0.837777        | 3.498971  | -1.659037 |
| C  | -0.285272    | 4.239343  | 0.460671  | -0.292354        | 4.245330  | 0.456414  |
| H  | 1.136114     | 4.497714  | -1.259700 | 1.124660         | 4.504957  | -1.267664 |
| C  | -1.927469    | 3.230199  | -0.800474 | -1.937004        | 3.234008  | -0.801214 |
| H  | -0.779784    | 3.265839  | -2.713182 | -0.792577        | 3.270107  | -2.716412 |
| C  | -1.597199    | 3.674032  | 0.506478  | -1.604283        | 3.679570  | 0.504868  |
| H  | 0.232386     | 4.711759  | 1.286410  | 0.224533         | 4.722631  | 1.279734  |
| H  | -2.857337    | 2.761547  | -1.093573 | -2.867898        | 2.766283  | -1.092443 |
| H  | -2.244585    | 3.624399  | 1.373200  | -2.250452        | 3.632329  | 1.372564  |
| C  | -3.672058    | -1.901877 | -0.883927 | -3.671267        | -1.911905 | -0.889092 |
| C  | -2.614404    | -2.464808 | -1.656167 | -2.611309        | -2.475022 | -1.659037 |
| C  | -3.528743    | -2.366724 | 0.460671  | -3.530386        | -2.375850 | 0.456414  |
| H  | -4.463191    | -1.264953 | -1.259700 | -4.463737        | -1.278494 | -1.267664 |
| C  | -1.833700    | -3.284337 | -0.800474 | -1.832231        | -3.294498 | -0.801214 |
| H  | -2.438407    | -2.308232 | -2.713182 | -2.435707        | -2.321445 | -2.716412 |
| C  | -2.383206    | -3.220231 | 0.506478  | -2.384460        | -3.229135 | 0.504868  |
| H  | -4.196696    | -2.154628 | 1.286410  | -4.202185        | -2.166865 | 1.279734  |
| H  | -0.962902    | -3.855300 | -1.093573 | -0.961722        | -3.866814 | -1.092443 |
| H  | -2.016529    | -3.756068 | 1.373200  | -2.020463        | -3.765113 | 1.372564  |
| C  | 3.483103     | -2.229157 | -0.883927 | 3.491392         | -2.223458 | -0.889092 |
| C  | 3.441788     | -1.031736 | -1.656167 | 3.449087         | -1.023949 | -1.659037 |
| C  | 3.814015     | -1.872619 | 0.460671  | 3.822740         | -1.869479 | 0.456414  |
| H  | 3.327077     | -3.232761 | -1.259700 | 3.339077         | -3.226462 | -1.267664 |
| C  | 3.761169     | 0.054138  | -0.800474 | 3.769235         | 0.060490  | -0.801214 |
| H  | 3.218192     | -0.957606 | -2.713182 | 3.228284         | -0.948662 | -2.716412 |
| C  | 3.980405     | -0.453801 | 0.506478  | 3.988742         | -0.450435 | 0.504868  |
| H  | 3.964310     | -2.557132 | 1.286410  | 3.977652         | -2.555767 | 1.279734  |
| H  | 3.820239     | 1.093752  | -1.093573 | 3.829620         | 1.100531  | -1.092443 |
| H  | 4.261115     | 0.131668  | 1.373200  | 4.270915         | 0.132784  | 1.372564  |

Table S2 Coordinates of Cp<sub>3</sub>Nb<sub>3</sub>(CO)<sub>9</sub> 9-1 C<sub>3</sub>

|    | BP86/SDD  |           |           | BP86/LANL2DZ |           |           |
|----|-----------|-----------|-----------|--------------|-----------|-----------|
| Nb | 0.000000  | 1.973204  | -0.010936 | 0.000000     | 1.973810  | -0.009535 |
| Nb | 1.708845  | -0.986602 | -0.010936 | 1.709370     | -0.986905 | -0.009535 |
| Nb | -1.708845 | -0.986602 | -0.010936 | -1.709370    | -0.986905 | -0.009535 |
| C  | 1.541260  | -0.543208 | 2.046318  | 1.534206     | -0.553585 | 2.051644  |
| O  | 1.688052  | -0.437658 | 3.207084  | 1.684259     | -0.455102 | 3.212467  |
| C  | 0.510835  | -1.500784 | -1.673679 | 0.519135     | -1.503081 | -1.678253 |
| O  | 0.283556  | -1.944379 | -2.754461 | 0.290504     | -1.942757 | -2.759101 |
| C  | -1.241062 | -1.063166 | 2.046318  | -1.246522    | -1.051868 | 2.051644  |
| O  | -1.223048 | -1.243067 | 3.207084  | -1.236259    | -1.231060 | 3.212467  |
| C  | -1.555135 | 0.307996  | -1.673679 | -1.561274    | 0.301956  | -1.678253 |
| O  | -1.825660 | 0.726623  | -2.754461 | -1.827729    | 0.719795  | -2.759101 |
| C  | 1.044300  | 1.192789  | -1.673679 | 1.042139     | 1.201125  | -1.678253 |
| O  | 1.542104  | 1.217756  | -2.754461 | 1.537225     | 1.222963  | -2.759101 |
| C  | -0.300198 | 1.606374  | 2.046318  | -0.287684    | 1.605454  | 2.051644  |
| O  | -0.465003 | 1.680724  | 3.207084  | -0.448000    | 1.686162  | 3.212467  |
| C  | 1.913452  | 2.368998  | 0.644690  | 1.914532     | 2.376159  | 0.642609  |
| O  | 2.973371  | 2.728634  | 1.026390  | 2.973750     | 2.737092  | 1.023692  |
| C  | 1.094886  | -2.841597 | 0.644690  | 1.100548     | -2.846112 | 0.642609  |
| O  | 0.876381  | -3.939332 | 1.026390  | 0.883516     | -3.943889 | 1.023692  |
| C  | -3.008338 | 0.472599  | 0.644690  | -3.015079    | 0.469954  | 0.642609  |
| O  | -3.849752 | 1.210697  | 1.026390  | -3.857266    | 1.206797  | 1.023692  |
| C  | 0.207753  | 4.177248  | -0.914953 | 0.191369     | 4.183679  | -0.920143 |
| C  | -0.820652 | 3.536435  | -1.688776 | -0.838680    | 3.539638  | -1.690059 |
| C  | -0.273002 | 4.305310  | 0.440150  | -0.284921    | 4.311488  | 0.437090  |
| H  | 1.169328  | 4.531884  | -1.294250 | 1.149286     | 4.542895  | -1.303863 |
| C  | -1.933051 | 3.282645  | -0.822793 | -1.947764    | 3.284052  | -0.819798 |
| H  | -0.770132 | 3.286799  | -2.751414 | -0.791999    | 3.291942  | -2.753070 |
| C  | -1.598598 | 3.743664  | 0.491538  | -1.609128    | 3.746391  | 0.493481  |
| H  | 0.255431  | 4.779670  | 1.270936  | 0.243713     | 4.790663  | 1.264819  |
| H  | -2.872460 | 2.807623  | -1.112011 | -2.887244    | 2.807027  | -1.105174 |
| H  | -2.249884 | 3.701357  | 1.368027  | -2.256935    | 3.703505  | 1.372353  |
| C  | -3.721479 | -1.908705 | -0.914953 | -3.718857    | -1.926109 | -0.920143 |
| C  | -2.652316 | -2.478923 | -1.688776 | -2.646077    | -2.496138 | -1.690059 |
| C  | -3.592006 | -2.389082 | 0.440150  | -3.591397    | -2.402492 | 0.437090  |
| H  | -4.509391 | -1.253274 | -1.294250 | -4.508905    | -1.276136 | -1.303863 |
| C  | -1.876328 | -3.315394 | -0.822793 | -1.870191    | -3.328839 | -0.819798 |
| H  | -2.461386 | -2.310353 | -2.751414 | -2.454906    | -2.331862 | -2.753070 |
| C  | -2.442809 | -3.256259 | 0.491538  | -2.439905    | -3.266741 | 0.493481  |
| H  | -4.267031 | -2.168626 | 1.270936  | -4.270693    | -2.184270 | 1.264819  |
| H  | -0.995243 | -3.891435 | -1.112011 | -0.987334    | -3.903941 | -1.105174 |
| H  | -2.080528 | -3.799135 | 1.368027  | -2.078862    | -3.806316 | 1.372353  |
| C  | 3.513726  | -2.268543 | -0.914953 | 3.527488     | -2.257570 | -0.920143 |
| C  | 3.472968  | -1.057512 | -1.688776 | 3.484757     | -1.043501 | -1.690059 |
| C  | 3.865009  | -1.916228 | 0.440150  | 3.876318     | -1.908995 | 0.437090  |
| H  | 3.340062  | -3.278610 | -1.294250 | 3.359619     | -3.266758 | -1.303863 |
| C  | 3.809379  | 0.032749  | -0.822793 | 3.817955     | 0.044787  | -0.819798 |
| H  | 3.231518  | -0.976446 | -2.751414 | 3.246905     | -0.960080 | -2.753070 |
| C  | 4.041407  | -0.487405 | 0.491538  | 4.049033     | -0.479649 | 0.493481  |
| H  | 4.011601  | -2.611045 | 1.270936  | 4.026980     | -2.606393 | 1.264819  |
| H  | 3.867703  | 1.083812  | -1.112011 | 3.874579     | 1.096914  | -1.105174 |
| H  | 4.330411  | 0.097778  | 1.368027  | 4.335797     | 0.102811  | 1.372353  |

Table S3 Coordinates of  $\text{Cp}_3\text{Nb}_3(\text{CO})_9$  9-2  $C_1$

|    | MPW1PW91/SDD |           |           | MPW1PW91/LANL2DZ |           |           |
|----|--------------|-----------|-----------|------------------|-----------|-----------|
| Nb | -1.287701    | -1.411223 | -0.029670 | -1.273498        | -1.421744 | -0.031545 |
| Nb | 1.926135     | -0.269851 | -0.005097 | 1.918526         | -0.265242 | -0.005214 |
| Nb | -0.744079    | 1.791393  | 0.032875  | -0.749103        | 1.791558  | 0.036803  |
| C  | -1.168189    | 0.029100  | -1.665584 | -1.163031        | 0.010346  | -1.671556 |
| C  | -1.111893    | 0.530583  | 1.707912  | -1.112071        | 0.538339  | 1.718376  |
| C  | 2.218997     | -2.305559 | 0.153603  | 2.220192         | -2.301907 | 0.157756  |
| C  | -0.303881    | -2.312734 | 1.573912  | -0.286124        | -2.308663 | 1.582761  |
| C  | -0.386422    | -2.794155 | -1.268278 | -0.371191        | -2.806661 | -1.269049 |
| C  | 1.402911     | -0.777819 | -1.995876 | 1.412215         | -0.775318 | -2.004252 |
| C  | 1.481670     | -0.326457 | 2.075276  | 1.483387         | -0.304767 | 2.082462  |
| C  | 0.631160     | 1.973809  | -1.510748 | 0.626783         | 1.973991  | -1.509898 |
| C  | 0.711170     | 2.531107  | 1.282093  | 0.702824         | 2.551301  | 1.279863  |
| O  | -1.436860    | 0.248752  | -2.792575 | -1.428393        | 0.237591  | -2.796060 |
| O  | -1.451545    | 0.352620  | 2.818604  | -1.454898        | 0.350128  | 2.824839  |
| O  | 2.521017     | -3.419588 | 0.241598  | 2.528049         | -3.413820 | 0.247594  |
| O  | 0.054587     | -2.967494 | 2.462028  | 0.072792         | -2.955244 | 2.476276  |
| O  | -0.016265    | -3.644655 | -1.963406 | -0.001056        | -3.655968 | -1.965445 |
| O  | 1.359551     | -1.052536 | -3.116326 | 1.374463         | -1.051327 | -3.124068 |
| O  | 1.451374     | -0.353084 | 3.226246  | 1.455732         | -0.319328 | 3.233330  |
| O  | 1.223196     | 2.345908  | -2.446383 | 1.215905         | 2.345935  | -2.446873 |
| O  | 1.430602     | 3.078283  | 2.017350  | 1.422027         | 3.104720  | 2.010178  |
| C  | 3.712920     | 1.003414  | 1.010516  | 3.710431         | 1.018903  | 1.010527  |
| C  | 4.181525     | -0.310860 | 0.692892  | 4.181012         | -0.296032 | 0.695262  |
| C  | 3.418509     | 1.672088  | -0.203750 | 3.416651         | 1.686315  | -0.204751 |
| H  | 3.627890     | 1.432541  | 2.001075  | 3.626392         | 1.449684  | 2.000415  |
| C  | 4.165805     | -0.443799 | -0.729661 | 4.166928         | -0.430657 | -0.727251 |
| H  | 4.539308     | -1.047349 | 1.401554  | 4.543204         | -1.029134 | 1.405091  |
| C  | 3.680465     | 0.782880  | -1.277409 | 3.679531         | 0.795008  | -1.277043 |
| H  | 3.049462     | 2.684445  | -0.295636 | 3.047639         | 2.698496  | -0.298110 |
| H  | 4.501529     | -1.303863 | -1.295484 | 4.507396         | -1.289525 | -1.291950 |
| H  | 3.559341     | 1.013621  | -2.328358 | 3.562507         | 1.024792  | -2.328598 |
| C  | -1.856234    | 3.758940  | 0.827254  | -1.884821        | 3.768865  | 0.801572  |
| C  | -1.365340    | 4.023293  | -0.487566 | -1.395714        | 4.016606  | -0.517355 |
| C  | -2.862832    | 2.761398  | 0.728796  | -2.883298        | 2.761516  | 0.718786  |
| H  | -1.539614    | 4.249414  | 1.739523  | -1.572309        | 4.276390  | 1.705881  |
| C  | -2.074064    | 3.178123  | -1.395224 | -2.099128        | 3.152408  | -1.412104 |
| H  | -0.615085    | 4.757962  | -0.752288 | -0.654593        | 4.755854  | -0.794378 |
| C  | -3.000232    | 2.406962  | -0.642522 | -3.018951        | 2.385486  | -0.647497 |
| H  | -3.431028    | 2.360503  | 1.559234  | -3.450118        | 2.370214  | 1.554694  |
| H  | -1.940302    | 3.135240  | -2.469180 | -1.966733        | 3.096298  | -2.485526 |
| H  | -3.695479    | 1.684121  | -1.049451 | -3.711121        | 1.653426  | -1.042825 |
| C  | -3.113615    | -2.103074 | 1.341982  | -3.105636        | -2.105548 | 1.351238  |
| C  | -3.601460    | -1.006162 | 0.585901  | -3.596750        | -1.017806 | 0.584271  |
| C  | -2.806923    | -3.164187 | 0.429061  | -2.797263        | -3.176392 | 0.449319  |
| H  | -3.014608    | -2.133815 | 2.419696  | -3.006776        | -2.125442 | 2.429222  |
| C  | -3.592574    | -1.372924 | -0.790264 | -3.588722        | -1.399817 | -0.788488 |
| H  | -3.921977    | -0.055727 | 0.991672  | -3.920206        | -0.064088 | 0.979533  |
| C  | -3.109268    | -2.703435 | -0.890060 | -3.104060        | -2.730965 | -0.874193 |
| H  | -2.458823    | -4.154552 | 0.693900  | -2.449972        | -4.164049 | 0.724887  |
| H  | -3.907528    | -0.758994 | -1.624359 | -3.908653        | -0.796107 | -1.628095 |
| H  | -3.020114    | -3.275412 | -1.804953 | -3.015709        | -3.313082 | -1.782745 |

Table S4 Coordinates of  $\text{Cp}_3\text{Nb}_3(\text{CO})_9$  9-2  $C_1$

|    | BP86/SDD  |           |           | BP86/LANL2DZ |           |           |
|----|-----------|-----------|-----------|--------------|-----------|-----------|
| Nb | -1.303017 | -1.423246 | -0.007791 | -1.280105    | -1.441552 | -0.008331 |
| Nb | 1.982146  | -0.260575 | -0.000491 | 1.975045     | -0.245023 | -0.000450 |
| Nb | -0.778949 | 1.798994  | 0.011863  | -0.796199    | 1.797081  | 0.012475  |
| C  | -1.144553 | 0.212983  | -1.610534 | -1.131751    | 0.197322  | -1.610316 |
| C  | -1.142083 | 0.306615  | 1.621802  | -1.135315    | 0.297881  | 1.622163  |
| C  | 2.320109  | -2.299015 | 0.022213  | 2.332821     | -2.281997 | 0.022981  |
| C  | -0.319452 | -2.534283 | 1.450748  | -0.288240    | -2.538234 | 1.456756  |
| C  | -0.338706 | -2.617197 | -1.406545 | -0.308494    | -2.624530 | -1.411959 |
| C  | 1.450628  | -0.622961 | -2.024431 | 1.463126     | -0.608113 | -2.033172 |
| C  | 1.460999  | -0.551217 | 2.038986  | 1.468397     | -0.532582 | 2.047102  |
| C  | 0.630113  | 2.202882  | -1.455099 | 0.610238     | 2.213450  | -1.455062 |
| C  | 0.639765  | 2.307271  | 1.430981  | 0.616522     | 2.320088  | 1.433132  |
| O  | -1.463983 | 0.280825  | -2.766271 | -1.447457    | 0.262216  | -2.765726 |
| O  | -1.475837 | 0.276216  | 2.774134  | -1.467906    | 0.260139  | 2.773043  |
| O  | 2.648023  | -3.428970 | 0.034523  | 2.673040     | -3.407945 | 0.035467  |
| O  | 0.044331  | -3.299271 | 2.270575  | 0.079810     | -3.296359 | 2.280875  |
| O  | 0.031442  | -3.411236 | -2.195046 | 0.066120     | -3.412023 | -2.204763 |
| O  | 1.402628  | -0.799559 | -3.183467 | 1.422443     | -0.783288 | -3.192165 |
| O  | 1.412900  | -0.687625 | 3.202922  | 1.425530     | -0.664097 | 3.211319  |
| O  | 1.263375  | 2.654484  | -2.349449 | 1.239235     | 2.668432  | -2.350199 |
| O  | 1.300595  | 2.785587  | 2.290220  | 1.272654     | 2.801256  | 2.293945  |
| C  | 3.732839  | 0.998092  | 1.138924  | 3.722011     | 1.034598  | 1.140472  |
| C  | 4.256989  | -0.276815 | 0.716019  | 4.255886     | -0.237196 | 0.717789  |
| C  | 3.420663  | 1.760315  | -0.031447 | 3.406151     | 1.795702  | -0.029994 |
| H  | 3.615190  | 1.340178  | 2.169951  | 3.603730     | 1.376136  | 2.171457  |
| C  | 4.253395  | -0.296535 | -0.726259 | 4.253405     | -0.256666 | -0.724681 |
| H  | 4.630222  | -1.067008 | 1.371970  | 4.637259     | -1.023103 | 1.373988  |
| C  | 3.725605  | 0.965013  | -1.181931 | 3.716375     | 1.001808  | -1.180464 |
| H  | 3.010750  | 2.771676  | -0.044070 | 2.988882     | 2.803965  | -0.042640 |
| H  | 4.621781  | -1.105300 | -1.362028 | 4.630758     | -1.061063 | -1.360512 |
| H  | 3.601101  | 1.277464  | -2.221504 | 3.593102     | 1.314087  | -2.220082 |
| C  | -1.913860 | 3.677525  | 1.050985  | -1.961774    | 3.674442  | 1.042474  |
| C  | -1.390461 | 4.104592  | -0.221280 | -1.444976    | 4.098515  | -0.233889 |
| C  | -2.930703 | 2.699387  | 0.807949  | -2.966529    | 2.681709  | 0.808456  |
| H  | -1.602407 | 4.045097  | 2.032084  | -1.652935    | 4.052821  | 2.020165  |
| C  | -2.095419 | 3.382931  | -1.252047 | -2.145006    | 3.362235  | -1.258571 |
| H  | -0.625057 | 4.868650  | -0.378051 | -0.692718    | 4.873932  | -0.397699 |
| C  | -3.041949 | 2.516285  | -0.613060 | -3.079053    | 2.488006  | -0.611798 |
| H  | -3.515661 | 2.190761  | 1.578230  | -3.545592    | 2.172743  | 1.582759  |
| H  | -1.942806 | 3.480392  | -2.329749 | -1.996996    | 3.455828  | -2.337147 |
| H  | -3.733982 | 1.843643  | -1.124856 | -3.766158    | 1.805397  | -1.116690 |
| C  | -3.150603 | -2.366944 | 1.227309  | -3.131800    | -2.393216 | 1.231662  |
| C  | -3.655678 | -1.160312 | 0.646317  | -3.645089    | -1.195239 | 0.640175  |
| C  | -2.811350 | -3.267383 | 0.148609  | -2.781750    | -3.299472 | 0.160429  |
| H  | -3.056597 | -2.572489 | 2.296078  | -3.038133    | -2.589600 | 2.302128  |
| C  | -3.637680 | -1.305728 | -0.783984 | -3.624516    | -1.352481 | -0.789689 |
| H  | -3.995095 | -0.282718 | 1.200729  | -3.994381    | -0.316300 | 1.185957  |
| C  | -3.122159 | -2.602811 | -1.094429 | -3.098901    | -2.648037 | -1.088487 |
| H  | -2.437044 | -4.288153 | 0.255284  | -2.402734    | -4.317495 | 0.275918  |
| H  | -3.957769 | -0.562838 | -1.517863 | -3.951594    | -0.618573 | -1.529257 |
| H  | -3.006500 | -3.021185 | -2.096949 | -2.978994    | -3.074135 | -2.087171 |

Table S5 Coordinates of Cp<sub>3</sub>Nb<sub>3</sub>(CO)<sub>9</sub> 9-3 C<sub>1</sub>

|    | MPW1PW91/SDD |           |           | MPW1PW91/LANL2DZ |           |           |
|----|--------------|-----------|-----------|------------------|-----------|-----------|
| C  | -0.547471    | 0.457443  | -1.722699 | -0.523698        | 0.472066  | -1.731520 |
| C  | -1.799988    | -0.300991 | 1.580027  | -1.826764        | -0.286001 | 1.584008  |
| C  | 2.903116     | -1.530359 | 1.015008  | 2.876806         | -1.556540 | 1.040709  |
| C  | -0.724145    | -2.747079 | 1.644874  | -0.777438        | -2.752560 | 1.646662  |
| C  | 0.654814     | -2.449563 | -0.652491 | 0.631642         | -2.459748 | -0.645314 |
| C  | 2.706929     | 1.267780  | 1.267002  | 2.701759         | 1.239568  | 1.279460  |
| C  | 0.819666     | -0.463823 | 1.786272  | 0.785159         | -0.490673 | 1.772817  |
| C  | 0.636470     | 2.875614  | -0.676524 | 0.694340         | 2.864239  | -0.662996 |
| C  | -0.119224    | 2.052176  | 1.838476  | -0.106851        | 2.043628  | 1.854308  |
| O  | -0.528235    | 0.155619  | -2.862435 | -0.509333        | 0.169735  | -2.869461 |
| O  | -2.390206    | -0.005559 | 2.543265  | -2.419576        | 0.024560  | 2.539274  |
| O  | 3.537530     | -2.303159 | 1.593225  | 3.495475         | -2.334048 | 1.629106  |
| O  | -0.577982    | -3.450731 | 2.553608  | -0.652759        | -3.464917 | 2.551405  |
| O  | 1.334697     | -3.295109 | -1.099802 | 1.298289         | -3.315828 | -1.089554 |
| O  | 3.244319     | 1.992651  | 1.989030  | 3.236679         | 1.964956  | 2.002243  |
| O  | 0.708930     | -0.559777 | 2.945557  | 0.682172         | -0.582401 | 2.934449  |
| O  | 1.395717     | 3.679560  | -1.041778 | 1.467599         | 3.657670  | -1.020678 |
| O  | 0.206198     | 2.438596  | 2.878973  | 0.208517         | 2.417613  | 2.901756  |
| Nb | -0.922152    | 1.689257  | -0.062821 | -0.888752        | 1.699976  | -0.063924 |
| Nb | -1.123678    | -1.578669 | 0.013035  | -1.142788        | -1.564958 | 0.018390  |
| Nb | 1.891875     | -0.084149 | -0.055760 | 1.888595         | -0.108370 | -0.052553 |
| C  | -2.829989    | 2.769363  | 0.912017  | -2.797993        | 2.807695  | 0.899739  |
| C  | -2.040666    | 3.756490  | 0.245624  | -1.988148        | 3.786484  | 0.244931  |
| C  | -3.354804    | 1.892202  | -0.073988 | -3.328056        | 1.943121  | -0.094870 |
| H  | -3.015615    | 2.706104  | 1.977002  | -2.995813        | 2.744620  | 1.962490  |
| C  | -2.075321    | 3.471047  | -1.155091 | -2.016067        | 3.508778  | -1.157645 |
| H  | -1.538178    | 4.593915  | 0.713569  | -1.479302        | 4.615242  | 0.721241  |
| C  | -2.885126    | 2.319124  | -1.346874 | -2.841143        | 2.369499  | -1.361809 |
| H  | -4.010336    | 1.052926  | 0.117038  | -3.998567        | 1.113615  | 0.086128  |
| H  | -1.604472    | 4.051872  | -1.938191 | -1.531670        | 4.087475  | -1.934022 |
| H  | -3.116678    | 1.867442  | -2.303622 | -3.073325        | 1.927381  | -2.322793 |
| C  | -2.937615    | -3.157658 | -0.065247 | -2.983857        | -3.122879 | -0.104838 |
| C  | -3.496513    | -1.901975 | -0.421749 | -3.522659        | -1.854788 | -0.449186 |
| C  | -1.987547    | -3.514039 | -1.065380 | -2.028540        | -3.477946 | -1.100465 |
| H  | -3.202801    | -3.745597 | 0.804699  | -3.264365        | -3.718687 | 0.754851  |
| C  | -2.912704    | -1.490106 | -1.653542 | -2.923590        | -1.434671 | -1.671560 |
| H  | -4.260763    | -1.376293 | 0.137819  | -4.287292        | -1.327981 | 0.108641  |
| C  | -1.972865    | -2.475396 | -2.049985 | -1.992497        | -2.426699 | -2.071908 |
| H  | -1.404470    | -4.426245 | -1.092471 | -1.458473        | -4.397986 | -1.135733 |
| H  | -3.144963    | -0.587007 | -2.201157 | -3.140903        | -0.521952 | -2.208887 |
| H  | -1.373988    | -2.452331 | -2.951341 | -1.387547        | -2.401790 | -2.968969 |
| C  | 2.348320     | 0.829767  | -2.304584 | 2.379141         | 0.796130  | -2.309835 |
| C  | 3.388289     | 1.220856  | -1.415329 | 3.417737         | 1.171703  | -1.411613 |
| C  | 2.369892     | -0.581454 | -2.422798 | 2.378947         | -0.615483 | -2.426015 |
| H  | 1.672902     | 1.496760  | -2.820493 | 1.718780         | 1.473954  | -2.831081 |
| C  | 4.073145     | 0.040016  | -0.993111 | 4.081499         | -0.019094 | -0.984026 |
| H  | 3.645284     | 2.239492  | -1.155189 | 3.689145         | 2.186275  | -1.150297 |
| C  | 3.426594     | -1.077884 | -1.612375 | 3.421338         | -1.127509 | -1.605892 |
| H  | 1.694244     | -1.176642 | -3.021570 | 1.701748         | -1.201206 | -3.032179 |
| H  | 4.953139     | 0.003520  | -0.363230 | 4.955667         | -0.068463 | -0.346938 |
| H  | 3.711572     | -2.117920 | -1.517849 | 3.689757         | -2.171705 | -1.508085 |

Table S6 Coordinates of Cp<sub>3</sub>Nb<sub>3</sub>(CO)<sub>9</sub> 9-3 C<sub>1</sub>

|    | BP86/SDD  |           |           | BP86/LANL2DZ |           |           |
|----|-----------|-----------|-----------|--------------|-----------|-----------|
| C  | -0.546458 | 0.139695  | -1.552881 | -0.529567    | 0.139738  | -1.547078 |
| C  | -1.710787 | -0.095550 | 1.495549  | -1.708760    | -0.073405 | 1.498346  |
| C  | 2.875340  | -1.529070 | 1.053294  | 2.847768     | -1.558158 | 1.068174  |
| C  | -0.544170 | -2.488666 | 1.758432  | -0.579651    | -2.479927 | 1.767470  |
| C  | 0.625891  | -2.549960 | -0.663520 | 0.597436     | -2.565409 | -0.661637 |
| C  | 2.806154  | 1.379297  | 1.130519  | 2.814943     | 1.355411  | 1.129443  |
| C  | 0.997310  | -0.149290 | 1.888444  | 0.988576     | -0.155242 | 1.888428  |
| C  | 0.632703  | 2.735339  | -0.745620 | 0.677583     | 2.724149  | -0.744305 |
| C  | -0.244720 | 2.270732  | 1.813190  | -0.224375    | 2.279393  | 1.819887  |
| O  | -0.546296 | 0.008459  | -2.758488 | -0.536425    | 0.012643  | -2.751276 |
| O  | -2.344920 | 0.049363  | 2.497408  | -2.341161    | 0.078577  | 2.498740  |
| O  | 3.475537  | -2.332831 | 1.664721  | 3.430646     | -2.370970 | 1.683766  |
| O  | -0.331194 | -3.072664 | 2.758376  | -0.381416    | -3.061512 | 2.771695  |
| O  | 1.335232  | -3.412576 | -1.073473 | 1.297144     | -3.436298 | -1.068218 |
| O  | 3.364464  | 2.175812  | 1.790074  | 3.376023     | 2.153616  | 1.783871  |
| O  | 0.847540  | -0.187401 | 3.058314  | 0.845663     | -0.190076 | 3.059390  |
| O  | 1.381867  | 3.548593  | -1.172001 | 1.436470     | 3.527065  | -1.172269 |
| O  | 0.047918  | 2.766997  | 2.838777  | 0.064839     | 2.772138  | 2.847929  |
| Nb | -0.986845 | 1.662485  | -0.036762 | -0.959441    | 1.675954  | -0.035654 |
| Nb | -1.114305 | -1.598719 | -0.014998 | -1.131134    | -1.589472 | -0.012780 |
| Nb | 1.930804  | -0.065351 | -0.052671 | 1.927110     | -0.086752 | -0.049900 |
| C  | -2.942041 | 2.896962  | 0.677226  | -2.911351    | 2.943480  | 0.660602  |
| C  | -2.093116 | 3.782928  | -0.079951 | -2.047546    | 3.813120  | -0.099519 |
| C  | -3.425494 | 1.886890  | -0.216363 | -3.404410    | 1.933093  | -0.227228 |
| H  | -3.181550 | 2.980036  | 1.740178  | -3.153909    | 3.038023  | 1.721791  |
| C  | -2.067603 | 3.311503  | -1.444960 | -2.025777    | 3.333097  | -1.462186 |
| H  | -1.593160 | 4.677234  | 0.300078  | -1.539948    | 4.705027  | 0.275754  |
| C  | -2.888293 | 2.143378  | -1.524833 | -2.860294    | 2.174649  | -1.536474 |
| H  | -4.096612 | 1.069463  | 0.055764  | -4.088642    | 1.127621  | 0.047287  |
| H  | -1.536942 | 3.779585  | -2.277561 | -1.487605    | 3.789494  | -2.296299 |
| H  | -3.065355 | 1.556634  | -2.429293 | -3.043123    | 1.584331  | -2.437259 |
| C  | -2.936026 | -3.182323 | 0.281948  | -2.984295    | -3.152803 | 0.272936  |
| C  | -3.540593 | -1.965852 | -0.168343 | -3.570889    | -1.926137 | -0.173472 |
| C  | -2.075451 | -3.664788 | -0.765373 | -2.128284    | -3.643378 | -0.774810 |
| H  | -3.107834 | -3.662743 | 1.248510  | -3.162907    | -3.633666 | 1.237907  |
| C  | -3.068112 | -1.698823 | -1.500665 | -3.094275    | -1.662083 | -1.505768 |
| H  | -4.249085 | -1.362849 | 0.405257  | -4.273396    | -1.316056 | 0.399681  |
| C  | -2.163704 | -2.743568 | -1.873803 | -2.205081    | -2.718372 | -1.881825 |
| H  | -1.487833 | -4.585837 | -0.738550 | -1.556019    | -4.574065 | -0.751515 |
| H  | -3.346459 | -0.847993 | -2.125890 | -3.361112    | -0.805605 | -2.127934 |
| H  | -1.641999 | -2.828447 | -2.830006 | -1.685538    | -2.808771 | -2.838478 |
| C  | 2.356082  | 0.721304  | -2.385175 | 2.378251     | 0.684057  | -2.395946 |
| C  | 3.430274  | 1.164046  | -1.546420 | 3.454357     | 1.115223  | -1.553435 |
| C  | 2.376080  | -0.708857 | -2.422787 | 2.377303     | -0.746636 | -2.426288 |
| H  | 1.645044  | 1.357527  | -2.913236 | 1.677744     | 1.328353  | -2.927988 |
| C  | 4.126603  | -0.003510 | -1.060812 | 4.131808     | -0.060097 | -1.059010 |
| H  | 3.692384  | 2.204630  | -1.343296 | 3.730199     | 2.152729  | -1.352909 |
| C  | 3.463545  | -1.163758 | -1.608986 | 3.454516     | -1.213275 | -1.605044 |
| H  | 1.675253  | -1.337758 | -2.973768 | 1.670498     | -1.368483 | -2.977189 |
| H  | 5.025185  | -0.006762 | -0.439184 | 5.026744     | -0.073368 | -0.432402 |
| H  | 3.751457  | -2.206125 | -1.455670 | 3.726892     | -2.258846 | -1.445327 |

Table S7 Coordinates of  $\text{Cp}_3\text{Nb}_3(\text{CO})_9$  9-4  $C_1$

|    | MPW1PW91/SDD |           |           | MPW1PW91/LANL2DZ |           |           |
|----|--------------|-----------|-----------|------------------|-----------|-----------|
| Nb | 1.903336     | -1.201949 | 0.085601  | 1.899745         | -1.209711 | 0.087816  |
| Nb | -2.263346    | -0.717170 | 0.091430  | -2.268640        | -0.712772 | 0.094741  |
| Nb | 0.263638     | 1.712736  | -0.111057 | 0.266190         | 1.714672  | -0.106982 |
| C  | -2.057975    | -0.515069 | 2.158922  | -2.051329        | -0.495212 | 2.162653  |
| O  | -2.056464    | -0.549221 | 3.314568  | -2.042899        | -0.526786 | 3.318022  |
| C  | -1.335811    | 0.158489  | -1.637271 | -1.345049        | 0.148086  | -1.639982 |
| O  | -1.282762    | 0.243965  | -2.806210 | -1.277904        | 0.228595  | -2.806908 |
| C  | -0.240671    | 1.675633  | 1.922067  | -0.220558        | 1.685009  | 1.932302  |
| O  | -0.450098    | 1.934046  | 3.031605  | -0.426051        | 1.952199  | 3.040210  |
| C  | 1.489983     | 0.563530  | -1.466995 | 1.488382         | 0.559471  | -1.462054 |
| O  | 2.032459     | 0.699447  | -2.518626 | 2.027071         | 0.692010  | -2.513747 |
| C  | 1.182652     | -2.097322 | -1.720919 | 1.179438         | -2.103965 | -1.724471 |
| O  | 0.792904     | -2.619945 | -2.669060 | 0.788186         | -2.624509 | -2.672687 |
| C  | 1.708032     | -0.560869 | 2.145173  | 1.723201         | -0.555782 | 2.146822  |
| O  | 1.659269     | -0.347059 | 3.274386  | 1.682600         | -0.335181 | 3.274926  |
| C  | -0.264377    | -1.505538 | 0.365234  | -0.269350        | -1.505662 | 0.375708  |
| O  | 0.299330     | -2.522324 | 0.798200  | 0.284564         | -2.524219 | 0.809025  |
| C  | -3.211824    | 1.158703  | 0.247521  | -3.212127        | 1.168745  | 0.246959  |
| O  | -3.827264    | 2.131096  | 0.383281  | -3.823709        | 2.143147  | 0.381259  |
| C  | 2.136149     | 2.040039  | 0.692421  | 2.143565         | 2.052123  | 0.686659  |
| O  | 3.161998     | 2.357194  | 1.141608  | 3.172325         | 2.366072  | 1.129546  |
| C  | 3.698429     | -2.674002 | -0.350921 | 3.700249         | -2.682567 | -0.360394 |
| C  | 3.877695     | -1.539973 | -1.222359 | 3.872681         | -1.545113 | -1.230138 |
| C  | 3.851119     | -2.216641 | 0.982407  | 3.859960         | -2.228544 | 0.972863  |
| H  | 3.521077     | -3.696708 | -0.660102 | 3.524396         | -3.705046 | -0.671324 |
| C  | 4.178000     | -0.409033 | -0.425592 | 4.178779         | -0.416005 | -0.432435 |
| H  | 3.832965     | -1.545284 | -2.304702 | 3.824045         | -1.548104 | -2.312325 |
| C  | 4.147678     | -0.806113 | 0.929429  | 4.155738         | -0.817326 | 0.921624  |
| H  | 3.806489     | -2.823572 | 1.878701  | 3.823496         | -2.838270 | 1.867625  |
| H  | 4.355585     | 0.593721  | -0.790945 | 4.358455         | 0.586990  | -0.796148 |
| H  | 4.358904     | -0.164966 | 1.776503  | 4.373222         | -0.179143 | 1.769453  |
| C  | 0.960912     | 3.641854  | -1.282339 | 0.958311         | 3.638980  | -1.303907 |
| C  | -0.033234    | 3.048288  | -2.107667 | -0.038408        | 3.041156  | -2.123473 |
| C  | 0.329207     | 4.069572  | -0.069005 | 0.328986         | 4.077675  | -0.092366 |
| H  | 2.002168     | 3.776579  | -1.547558 | 1.998521         | 3.772784  | -1.573195 |
| C  | -1.269286    | 3.117158  | -1.415650 | -1.273161        | 3.117135  | -1.429621 |
| H  | 0.128780     | 2.601753  | -3.080511 | 0.120843         | 2.590621  | -3.094626 |
| C  | -1.053240    | 3.735442  | -0.154925 | -1.054020        | 3.744882  | -0.173517 |
| H  | 0.804405     | 4.594794  | 0.750524  | 0.805032         | 4.613313  | 0.719810  |
| H  | -2.219144    | 2.758824  | -1.789793 | -2.224431        | 2.758484  | -1.799869 |
| H  | -1.810392    | 3.943365  | 0.590343  | -1.809777        | 3.962036  | 0.570412  |
| C  | -4.191741    | -1.417934 | -1.119151 | -4.201574        | -1.430015 | -1.115114 |
| C  | -3.136869    | -2.278078 | -1.535923 | -3.146902        | -2.294331 | -1.524895 |
| C  | -4.427847    | -1.654282 | 0.272762  | -4.438500        | -1.655537 | 0.278693  |
| H  | -4.735441    | -0.729769 | -1.754731 | -4.746283        | -0.747729 | -1.755968 |
| C  | -2.725710    | -3.046005 | -0.413455 | -2.736746        | -3.054119 | -0.395907 |
| H  | -2.719930    | -2.336699 | -2.533982 | -2.731313        | -2.363198 | -2.522713 |
| C  | -3.515779    | -2.665225 | 0.704169  | -3.527802        | -2.664051 | 0.718291  |
| H  | -5.193748    | -1.188738 | 0.880928  | -5.206358        | -1.186791 | 0.881823  |
| H  | -1.934436    | -3.785418 | -0.403984 | -1.946684        | -3.794576 | -0.380224 |
| H  | -3.453952    | -3.089522 | 1.698797  | -3.468293        | -3.081909 | 1.715712  |

Table S8 Coordinates of  $\text{Cp}_3\text{Nb}_3(\text{CO})_9$  9-4  $C_1$

|    | BP86/SDD  |           |           | BP86/LANL2DZ |           |           |
|----|-----------|-----------|-----------|--------------|-----------|-----------|
| Nb | 1.951366  | -1.175053 | 0.071287  | 1.947915     | -1.181633 | 0.074691  |
| Nb | -2.243675 | -0.775301 | 0.099756  | -2.246309    | -0.772501 | 0.104196  |
| Nb | 0.203640  | 1.743333  | -0.108927 | 0.204842     | 1.745479  | -0.106559 |
| C  | -2.074738 | -0.713467 | 2.175539  | -2.066263    | -0.697717 | 2.180535  |
| O  | -2.085720 | -0.820271 | 3.346887  | -2.071570    | -0.803069 | 3.351739  |
| C  | -1.236998 | 0.233756  | -1.578411 | -1.239920    | 0.222321  | -1.577999 |
| O  | -1.254095 | 0.266713  | -2.775455 | -1.242126    | 0.245687  | -2.773644 |
| C  | -0.424142 | 1.634086  | 1.885160  | -0.411698    | 1.644445  | 1.892181  |
| O  | -0.697166 | 1.875717  | 3.006633  | -0.685436    | 1.894632  | 3.011323  |
| C  | 1.563479  | 0.609579  | -1.417571 | 1.559216     | 0.604548  | -1.412998 |
| O  | 2.140679  | 0.836132  | -2.456277 | 2.132614     | 0.825363  | -2.452824 |
| C  | 1.282294  | -2.040076 | -1.773220 | 1.284146     | -2.049193 | -1.774438 |
| O  | 0.914192  | -2.559038 | -2.755424 | 0.919434     | -2.568066 | -2.757528 |
| C  | 1.650712  | -0.540758 | 2.115938  | 1.660579     | -0.533526 | 2.118282  |
| O  | 1.550464  | -0.347303 | 3.266047  | 1.565995     | -0.332719 | 3.267478  |
| C  | -0.250646 | -1.573714 | 0.342735  | -0.253926    | -1.577493 | 0.353922  |
| O  | 0.363450  | -2.602505 | 0.721169  | 0.350473     | -2.608312 | 0.733334  |
| C  | -3.182760 | 1.102979  | 0.348856  | -3.181814    | 1.110223  | 0.353445  |
| O  | -3.818151 | 2.078053  | 0.536218  | -3.812434    | 2.087158  | 0.543703  |
| C  | 2.033041  | 2.044879  | 0.822723  | 2.036110     | 2.061778  | 0.819031  |
| O  | 3.042841  | 2.376675  | 1.343180  | 3.047569     | 2.392200  | 1.335592  |
| C  | 3.783094  | -2.641492 | -0.333609 | 3.788860     | -2.643822 | -0.337935 |
| C  | 3.991909  | -1.478715 | -1.182001 | 3.989620     | -1.478954 | -1.186795 |
| C  | 3.881873  | -2.205398 | 1.026301  | 3.892121     | -2.208222 | 1.021585  |
| H  | 3.619006  | -3.667147 | -0.673384 | 3.628503     | -3.670086 | -0.677600 |
| C  | 4.251751  | -0.349895 | -0.344052 | 4.251797     | -0.349782 | -0.349433 |
| H  | 3.988259  | -1.464339 | -2.275055 | 3.982361     | -1.464446 | -2.279750 |
| C  | 4.173386  | -0.780267 | 1.013093  | 4.179897     | -0.781888 | 1.007836  |
| H  | 3.798918  | -2.834059 | 1.916913  | 3.817274     | -2.838110 | 1.911965  |
| H  | 4.437105  | 0.670620  | -0.684858 | 4.435724     | 0.670995  | -0.690057 |
| H  | 4.342898  | -0.149115 | 1.889069  | 4.352465     | -0.151595 | 1.883838  |
| C  | 0.935917  | 3.704389  | -1.272849 | 0.929600     | 3.701799  | -1.299334 |
| C  | -0.056926 | 3.113568  | -2.120786 | -0.064191    | 3.103758  | -2.141374 |
| C  | 0.281842  | 4.132515  | -0.055895 | 0.276497     | 4.140643  | -0.084703 |
| H  | 1.993451  | 3.828097  | -1.518725 | 1.986191     | 3.825718  | -1.548287 |
| C  | -1.315128 | 3.180579  | -1.437573 | -1.321743    | 3.176102  | -1.457068 |
| H  | 0.119602  | 2.659725  | -3.098672 | 0.111181     | 2.644036  | -3.116318 |
| C  | -1.110984 | 3.802694  | -0.162909 | -1.116442    | 3.809507  | -0.187535 |
| H  | 0.754800  | 4.645611  | 0.785570  | 0.749178     | 4.665398  | 0.749511  |
| H  | -2.269553 | 2.816123  | -1.823533 | -2.276536    | 2.808211  | -1.838692 |
| H  | -1.882033 | 4.000167  | 0.585513  | -1.886736    | 4.014611  | 0.559390  |
| C  | -4.212791 | -1.375271 | -1.171238 | -4.229166    | -1.384597 | -1.158544 |
| C  | -3.148528 | -2.174277 | -1.704660 | -3.167227    | -2.179397 | -1.703122 |
| C  | -4.415046 | -1.763642 | 0.205069  | -4.417515    | -1.775375 | 0.219322  |
| H  | -4.782588 | -0.620883 | -1.720093 | -4.807967    | -0.632406 | -1.700590 |
| C  | -2.690967 | -3.054383 | -0.669159 | -2.695931    | -3.058574 | -0.672464 |
| H  | -2.744351 | -2.108680 | -2.718047 | -2.773034    | -2.112007 | -2.720048 |
| C  | -3.469004 | -2.806689 | 0.511481  | -3.464833    | -2.815225 | 0.515933  |
| H  | -5.175114 | -1.366884 | 0.883026  | -5.174475    | -1.383630 | 0.903500  |
| H  | -1.884307 | -3.786161 | -0.760096 | -1.888255    | -3.787812 | -0.771924 |
| H  | -3.376432 | -3.334482 | 1.464025  | -3.363033    | -3.345170 | 1.466205  |

Table S9 Coordinates of  $\text{Cp}_3\text{Nb}_3(\text{CO})_8$  8-1  $C_1$

|    | MPW1PW91/SDD |           |           | MPW1PW91/LANL2DZ |           |           |
|----|--------------|-----------|-----------|------------------|-----------|-----------|
| Nb | 1.787955     | -0.636188 | -0.022264 | 1.741368         | -0.730110 | -0.025878 |
| Nb | -0.341335    | 1.807377  | -0.151191 | -0.227591        | 1.817474  | -0.145745 |
| Nb | -1.563928    | -1.166769 | -0.081383 | -1.625302        | -1.079645 | -0.082604 |
| C  | -1.048663    | 0.069905  | -1.596976 | -1.061944        | 0.130722  | -1.609763 |
| C  | 0.751922     | -1.347709 | 1.665221  | 0.678168         | -1.373571 | 1.672887  |
| C  | -1.680675    | -0.185891 | 1.754688  | -1.684491        | -0.077748 | 1.743167  |
| C  | -3.280131    | -0.079899 | -0.382242 | -3.278161        | 0.105641  | -0.385048 |
| C  | 1.544365     | -0.416917 | -2.116530 | 1.495778         | -0.507417 | -2.122938 |
| C  | 1.656255     | -2.601130 | -0.592520 | 1.489875         | -2.689842 | -0.586515 |
| C  | 1.461085     | 2.465979  | -0.871765 | 1.604593         | 2.374639  | -0.880855 |
| C  | 0.689919     | 1.575176  | 1.608179  | 0.796708         | 1.538916  | 1.610801  |
| O  | -0.854285    | 0.934355  | -2.405015 | -0.841316        | 0.968554  | -2.433480 |
| O  | 0.559344     | -1.835620 | 2.708551  | 0.458949         | -1.841108 | 2.719151  |
| O  | -1.931986    | 0.192099  | 2.825290  | -1.914916        | 0.318421  | 2.812176  |
| O  | -4.283472    | 0.460277  | -0.607949 | -4.246425        | 0.705549  | -0.610803 |
| O  | 1.600465     | -0.395529 | -3.268970 | 1.546582         | -0.494256 | -3.275494 |
| O  | 1.740411     | -3.710941 | -0.930624 | 1.511972         | -3.803781 | -0.918284 |
| O  | 2.408258     | 3.007487  | -1.281720 | 2.576817         | 2.859727  | -1.301064 |
| O  | 1.168406     | 1.696635  | 2.668450  | 1.284895         | 1.635481  | 2.668459  |
| C  | 4.086595     | -1.084547 | -0.410049 | 4.015576         | -1.316022 | -0.420080 |
| C  | 3.945854     | 0.330597  | -0.527086 | 3.960552         | 0.104728  | -0.543199 |
| C  | 3.796860     | -1.439937 | 0.944122  | 3.712631         | -1.647087 | 0.937452  |
| H  | 4.401183     | -1.760036 | -1.196103 | 4.286554         | -2.012560 | -1.203894 |
| C  | 3.586882     | 0.843726  | 0.747756  | 3.641276         | 0.644922  | 0.731462  |
| H  | 4.112775     | 0.920681  | -1.419662 | 4.159720         | 0.678840  | -1.439438 |
| C  | 3.481099     | -0.243516 | 1.652446  | 3.473865         | -0.430384 | 1.641910  |
| H  | 3.844044     | -2.435203 | 1.368571  | 3.703368         | -2.641129 | 1.366975  |
| H  | 3.425419     | 1.885013  | 0.989962  | 3.546100         | 1.695234  | 0.969704  |
| H  | 3.220051     | -0.168556 | 2.700811  | 3.225595         | -0.335436 | 2.691565  |
| C  | -1.028202    | 3.946741  | -0.891528 | -0.794868        | 4.000277  | -0.888365 |
| C  | -2.235006    | 3.184748  | -0.818790 | -2.045621        | 3.312531  | -0.813073 |
| C  | -0.526655    | 4.088713  | 0.440433  | -0.282783        | 4.112629  | 0.442481  |
| H  | -0.608393    | 4.390043  | -1.785743 | -0.353997        | 4.420787  | -1.783452 |
| C  | -2.466291    | 2.848589  | 0.534704  | -2.293985        | 2.990459  | 0.540685  |
| H  | -2.851965    | 2.894047  | -1.660435 | -2.681771        | 3.061684  | -1.653191 |
| C  | -1.401717    | 3.379385  | 1.313744  | -1.196850        | 3.455533  | 1.318030  |
| H  | 0.350258     | 4.649741  | 0.738644  | 0.625244         | 4.622970  | 0.738562  |
| H  | -3.301687    | 2.279438  | 0.919032  | -3.160321        | 2.469726  | 0.925372  |
| H  | -1.306355    | 3.299625  | 2.389417  | -1.105321        | 3.372722  | 2.393708  |
| C  | -3.330470    | -2.798387 | 0.161667  | -3.488466        | -2.612053 | 0.174597  |
| C  | -2.810383    | -2.896729 | -1.168786 | -2.971089        | -2.759738 | -1.152851 |
| C  | -2.315467    | -3.214432 | 1.065390  | -2.502465        | -3.074226 | 1.088477  |
| H  | -4.337267    | -2.504866 | 0.433233  | -4.476722        | -2.255086 | 0.438570  |
| C  | -1.470490    | -3.361602 | -1.077778 | -1.661203        | -3.299987 | -1.050291 |
| H  | -3.353212    | -2.682527 | -2.081219 | -3.498315        | -2.529218 | -2.070427 |
| C  | -1.172565    | -3.559651 | 0.305724  | -1.379136        | -3.495141 | 0.337729  |
| H  | -2.397984    | -3.254773 | 2.144855  | -2.591511        | -3.095977 | 2.167789  |
| H  | -0.806071    | -3.567342 | -1.906988 | -1.010961        | -3.562652 | -1.874490 |
| H  | -0.243024    | -3.935895 | 0.709712  | -0.475347        | -3.921773 | 0.750456  |

Table S10 Coordinates of  $\text{Cp}_3\text{Nb}_3(\text{CO})_8$  8-1  $C_7$

|    | BP86/SDD  |           |           | BP86/LANL2DZ |           |           |
|----|-----------|-----------|-----------|--------------|-----------|-----------|
| Nb | 1.836295  | -0.626207 | -0.026669 | 1.787021     | -0.725447 | -0.032545 |
| Nb | -0.362466 | 1.820372  | -0.166315 | -0.238476    | 1.831903  | -0.158598 |
| Nb | -1.585044 | -1.185275 | -0.058843 | -1.649160    | -1.094278 | -0.058000 |
| C  | -1.095119 | 0.072363  | -1.579176 | -1.096788    | 0.134761  | -1.587926 |
| C  | 0.747347  | -1.381272 | 1.620794  | 0.651726     | -1.400040 | 1.618959  |
| C  | -1.693199 | -0.203295 | 1.785955  | -1.714736    | -0.088111 | 1.773399  |
| C  | -3.327483 | -0.120706 | -0.314287 | -3.323289    | 0.074208  | -0.330426 |
| C  | 1.532847  | -0.420567 | -2.106922 | 1.492384     | -0.508393 | -2.115385 |
| C  | 1.733329  | -2.590616 | -0.616040 | 1.559546     | -2.683822 | -0.618241 |
| C  | 1.436666  | 2.476434  | -0.911071 | 1.595674     | 2.380169  | -0.905915 |
| C  | 0.676521  | 1.573680  | 1.597513  | 0.778623     | 1.542782  | 1.610642  |
| O  | -0.918893 | 0.936300  | -2.422029 | -0.894486    | 0.967675  | -2.450569 |
| O  | 0.583801  | -1.899142 | 2.678117  | 0.462908     | -1.895723 | 2.682164  |
| O  | -1.944483 | 0.176905  | 2.876419  | -1.953365    | 0.314755  | 2.858703  |
| O  | -4.359662 | 0.418296  | -0.512725 | -4.317067    | 0.677512  | -0.537009 |
| O  | 1.564792  | -0.402916 | -3.280990 | 1.526655     | -0.496071 | -3.289166 |
| O  | 1.825559  | -3.716137 | -0.968650 | 1.585245     | -3.812796 | -0.968482 |
| O  | 2.389873  | 3.033213  | -1.343246 | 2.578027     | 2.879285  | -1.342438 |
| O  | 1.146222  | 1.705057  | 2.682064  | 1.255751     | 1.644169  | 2.694111  |
| C  | 4.178126  | -1.036673 | -0.374996 | 4.106282     | -1.284328 | -0.376669 |
| C  | 4.008975  | 0.385847  | -0.502008 | 4.029315     | 0.146385  | -0.502091 |
| C  | 3.870528  | -1.396313 | 0.988093  | 3.776110     | -1.624995 | 0.986371  |
| H  | 4.511560  | -1.716923 | -1.162834 | 4.396178     | -1.983577 | -1.164947 |
| C  | 3.615454  | 0.901347  | 0.776496  | 3.670757     | 0.685143  | 0.777756  |
| H  | 4.171802  | 0.979747  | -1.404830 | 4.229719     | 0.728918  | -1.404497 |
| C  | 3.516982  | -0.194036 | 1.693258  | 3.501341     | -0.403321 | 1.693299  |
| H  | 3.923081  | -2.399823 | 1.417957  | 3.764169     | -2.630132 | 1.415053  |
| H  | 3.423649  | 1.949454  | 1.011511  | 3.548159     | 1.743126  | 1.014153  |
| H  | 3.230751  | -0.121193 | 2.745348  | 3.221892     | -0.313830 | 2.745607  |
| C  | -1.073968 | 3.978271  | -0.910449 | -0.824676    | 4.028835  | -0.922413 |
| C  | -2.287118 | 3.204046  | -0.817618 | -2.083669    | 3.331026  | -0.826228 |
| C  | -0.549994 | 4.128969  | 0.425528  | -0.294867    | 4.159078  | 0.413357  |
| H  | -0.661263 | 4.419956  | -1.820668 | -0.386662    | 4.439360  | -1.835316 |
| C  | -2.499326 | 2.867054  | 0.552525  | -2.318935    | 3.018803  | 0.545858  |
| H  | -2.918616 | 2.902818  | -1.657517 | -2.731348    | 3.063350  | -1.664965 |
| C  | -1.416182 | 3.410496  | 1.321355  | -1.204739    | 3.500305  | 1.313205  |
| H  | 0.340002  | 4.695117  | 0.710850  | 0.626016     | 4.674907  | 0.695705  |
| H  | -3.332066 | 2.285469  | 0.951738  | -3.184471    | 2.487971  | 0.946194  |
| H  | -1.301525 | 3.332183  | 2.405114  | -1.097648    | 3.425852  | 2.397836  |
| C  | -3.339035 | -2.874484 | 0.129718  | -3.505591    | -2.680885 | 0.150010  |
| C  | -2.804521 | -2.927598 | -1.212353 | -2.974605    | -2.786043 | -1.191305 |
| C  | -2.312526 | -3.299138 | 1.036525  | -2.507539    | -3.155542 | 1.064427  |
| H  | -4.362066 | -2.603797 | 0.403881  | -4.509622    | -2.342674 | 0.419580  |
| C  | -1.444817 | -3.372276 | -1.124979 | -1.645138    | -3.311432 | -1.095761 |
| H  | -3.350159 | -2.690734 | -2.129340 | -3.504802    | -2.531185 | -2.112412 |
| C  | -1.148183 | -3.603623 | 0.267371  | -1.363521    | -3.540172 | 0.300661  |
| H  | -2.400866 | -3.368246 | 2.123989  | -2.600141    | -3.203403 | 2.152414  |
| H  | -0.762006 | -3.537696 | -1.961196 | -0.975906    | -3.535792 | -1.929031 |
| H  | -0.201963 | -3.970851 | 0.667828  | -0.441677    | -3.959115 | 0.707445  |

Table S11 Coordinates of  $\text{Cp}_3\text{Nb}_3(\text{CO})_8$  8-2  $C_1$

|    | MPW1PW91/SDD |           |           | MPW1PW91/LANL2DZ |           |           |
|----|--------------|-----------|-----------|------------------|-----------|-----------|
| Nb | -1.609514    | -0.910636 | -0.103832 | -1.600700        | -0.915534 | -0.100758 |
| Nb | 1.716603     | -0.887900 | -0.139555 | 1.716323         | -0.878238 | -0.138440 |
| Nb | -0.038627    | 1.827883  | 0.062353  | -0.046677        | 1.822758  | 0.061320  |
| C  | -0.058686    | -0.108218 | -1.259853 | -0.057574        | -0.109256 | -1.267107 |
| C  | -0.002116    | 0.544329  | 1.766686  | -0.007834        | 0.528508  | 1.756472  |
| C  | 1.338944     | 2.456843  | 1.458471  | 1.320289         | 2.455813  | 1.468319  |
| C  | -1.697392    | 2.295123  | 1.165594  | -1.711517        | 2.284127  | 1.159894  |
| C  | -1.377873    | -2.413627 | -1.490024 | -1.346164        | -2.436791 | -1.467165 |
| C  | -2.599180    | 0.035359  | -1.620451 | -2.570096        | 0.011542  | -1.643172 |
| C  | 1.548363     | -2.795825 | -0.979511 | 1.604822         | -2.771892 | -1.027062 |
| C  | 0.970852     | -2.048635 | 1.376135  | 0.929389         | -2.074478 | 1.329305  |
| O  | 0.803413     | -0.233527 | -2.155079 | 0.790492         | -0.219298 | -2.171028 |
| O  | -0.017423    | 0.213954  | 2.895179  | -0.018616        | 0.195017  | 2.884183  |
| O  | 2.103469     | 2.835654  | 2.244249  | 2.082423         | 2.834352  | 2.255826  |
| O  | -2.619454    | 2.660769  | 1.769158  | -2.638638        | 2.650825  | 1.754447  |
| O  | -1.347784    | -3.236376 | -2.303366 | -1.303964        | -3.272963 | -2.265582 |
| O  | -3.173399    | 0.539676  | -2.494306 | -3.134217        | 0.506978  | -2.528124 |
| O  | 1.580253     | -3.884501 | -1.362468 | 1.660135         | -3.847597 | -1.440751 |
| O  | 0.772962     | -2.782823 | 2.259136  | 0.722544         | -2.830185 | 2.191966  |
| C  | -3.707877    | -1.959331 | 0.271490  | -3.716650        | -1.949496 | 0.269082  |
| C  | -2.743514    | -2.693100 | 1.032554  | -2.766031        | -2.689150 | 1.041091  |
| C  | -3.820695    | -0.655696 | 0.856999  | -3.823107        | -0.642827 | 0.848902  |
| H  | -4.297015    | -2.341968 | -0.552681 | -4.299324        | -2.329141 | -0.561202 |
| C  | -2.268206    | -1.843717 | 2.068782  | -2.293714        | -1.841735 | 2.080009  |
| H  | -2.455997    | -3.725188 | 0.873833  | -2.485713        | -3.724088 | 0.887728  |
| C  | -2.937711    | -0.597686 | 1.965881  | -2.950971        | -0.590341 | 1.967476  |
| H  | -4.497242    | 0.128924  | 0.541697  | -4.490286        | 0.146345  | 0.525124  |
| H  | -1.519920    | -2.096742 | 2.808443  | -1.555357        | -2.100262 | 2.827504  |
| H  | -2.798123    | 0.246478  | 2.627017  | -2.811402        | 0.253382  | 2.628935  |
| C  | 4.008201     | -1.479009 | -0.598798 | 4.040388         | -1.472739 | -0.504647 |
| C  | 3.905318     | -0.105715 | -0.938983 | 3.938468         | -0.110155 | -0.886441 |
| C  | 3.764806     | -1.606891 | 0.804904  | 3.750293         | -1.565685 | 0.892306  |
| H  | 4.274914     | -2.280888 | -1.276031 | 4.334669         | -2.290761 | -1.150676 |
| C  | 3.579135     | 0.622554  | 0.229858  | 3.568100         | 0.646033  | 0.251916  |
| H  | 4.017173     | 0.303133  | -1.936441 | 4.085416         | 0.273886  | -1.889162 |
| C  | 3.472583     | -0.306570 | 1.317035  | 3.433608         | -0.256226 | 1.360063  |
| H  | 3.826230     | -2.523174 | 1.379039  | 3.794282         | -2.467084 | 1.491131  |
| H  | 3.484889     | 1.696450  | 0.299025  | 3.468411         | 1.721022  | 0.289478  |
| H  | 3.280537     | -0.056090 | 2.352983  | 3.208057         | 0.018373  | 2.382945  |
| C  | 1.021582     | 3.789163  | -0.958034 | 1.017082         | 3.789565  | -0.965251 |
| C  | 0.984385     | 2.800200  | -1.973619 | 0.976711         | 2.804778  | -1.984360 |
| C  | -0.318489    | 4.130682  | -0.612100 | -0.322578        | 4.133004  | -0.616406 |
| H  | 1.914112     | 4.226228  | -0.526060 | 1.911025         | 4.223354  | -0.532667 |
| C  | -0.383090    | 2.548504  | -2.284688 | -0.391903        | 2.557429  | -2.295174 |
| H  | 1.833749     | 2.322234  | -2.443893 | 1.824712         | 2.327914  | -2.458092 |
| C  | -1.188812    | 3.363074  | -1.454174 | -1.195026        | 3.371567  | -1.461688 |
| H  | -0.619408    | 4.886958  | 0.102191  | -0.620969        | 4.889407  | 0.098852  |
| H  | -0.740270    | 1.857496  | -3.036241 | -0.751406        | 1.871750  | -3.050488 |
| H  | -2.270018    | 3.419448  | -1.475427 | -2.276114        | 3.430877  | -1.482028 |

Table S12 Coordinates of  $\text{Cp}_3\text{Nb}_3(\text{CO})_8$  8-2  $C_1$

|    | BP86/SDD  |           |           | BP86/LANL2DZ |           |           |
|----|-----------|-----------|-----------|--------------|-----------|-----------|
| Nb | -1.527960 | -1.055473 | -0.106366 | -1.529229    | -1.047138 | -0.105565 |
| Nb | 1.802067  | -0.766313 | -0.139754 | 1.797310     | -0.772726 | -0.144126 |
| Nb | -0.201814 | 1.855506  | 0.064665  | -0.192609    | 1.850989  | 0.068011  |
| C  | -0.033122 | -0.082170 | -1.259936 | -0.034839    | -0.079978 | -1.265684 |
| C  | -0.065480 | 0.526101  | 1.748829  | -0.070885    | 0.511783  | 1.744164  |
| C  | 1.082847  | 2.592785  | 1.495341  | 1.104497     | 2.563957  | 1.501325  |
| C  | -1.905563 | 2.159732  | 1.161854  | -1.892923    | 2.162370  | 1.170603  |
| C  | -1.134707 | -2.553639 | -1.469760 | -1.135925    | -2.545355 | -1.470808 |
| C  | -2.556698 | -0.206515 | -1.658767 | -2.540510    | -0.187717 | -1.664286 |
| C  | 1.845215  | -2.667500 | -0.995598 | 1.855973     | -2.662923 | -1.024875 |
| C  | 1.112049  | -2.028268 | 1.330867  | 1.077196     | -2.050395 | 1.299566  |
| O  | 0.846405  | -0.134199 | -2.168567 | 0.826156     | -0.122822 | -2.186080 |
| O  | -0.051645 | 0.195252  | 2.898189  | -0.057074    | 0.176840  | 2.892007  |
| O  | 1.804887  | 3.034985  | 2.317566  | 1.838497     | 2.989826  | 2.321093  |
| O  | -2.874147 | 2.443390  | 1.775003  | -2.860650    | 2.449769  | 1.782633  |
| O  | -1.027481 | -3.404305 | -2.275744 | -1.027288    | -3.396293 | -2.275831 |
| O  | -3.161404 | 0.245655  | -2.566610 | -3.137700    | 0.270087  | -2.573892 |
| O  | 2.005740  | -3.762376 | -1.392233 | 2.017924     | -3.752108 | -1.435520 |
| O  | 0.956973  | -2.810877 | 2.207373  | 0.913800     | -2.844175 | 2.164340  |
| C  | -3.540755 | -2.317279 | 0.244074  | -3.564284    | -2.290803 | 0.237540  |
| C  | -2.513330 | -2.943389 | 1.043532  | -2.548966    | -2.931980 | 1.040408  |
| C  | -3.802653 | -1.013777 | 0.810774  | -3.814805    | -0.986899 | 0.808244  |
| H  | -4.068078 | -2.770675 | -0.598846 | -4.089331    | -2.733787 | -0.612385 |
| C  | -2.149123 | -2.027637 | 2.085553  | -2.181623    | -2.025916 | 2.089701  |
| H  | -2.111133 | -3.949866 | 0.903778  | -2.157103    | -3.942193 | 0.898069  |
| C  | -2.947970 | -0.848141 | 1.947210  | -2.965974    | -0.836694 | 1.951825  |
| H  | -4.551161 | -0.298369 | 0.461347  | -4.552654    | -0.261480 | 0.456976  |
| H  | -1.382952 | -2.191817 | 2.846274  | -1.422240    | -2.202740 | 2.854132  |
| H  | -2.908482 | 0.025495  | 2.599901  | -2.920184    | 0.033508  | 2.608411  |
| C  | 4.175512  | -1.126070 | -0.555906 | 4.195061     | -1.168136 | -0.472649 |
| C  | 3.937143  | 0.242536  | -0.900633 | 3.972072     | 0.185350  | -0.882191 |
| C  | 3.916921  | -1.283089 | 0.855710  | 3.894952     | -1.266070 | 0.935080  |
| H  | 4.536412  | -1.903279 | -1.234116 | 4.569755     | -1.974735 | -1.107792 |
| C  | 3.512425  | 0.937130  | 0.274019  | 3.515950     | 0.929476  | 0.250836  |
| H  | 4.026228  | 0.667440  | -1.904562 | 4.096268     | 0.569189  | -1.898732 |
| C  | 3.479503  | -0.010903 | 1.367148  | 3.450051     | 0.026339  | 1.381369  |
| H  | 4.053936  | -2.200514 | 1.433601  | 4.006014     | -2.160947 | 1.552458  |
| H  | 3.311760  | 2.005700  | 0.348132  | 3.321406     | 2.001544  | 0.274794  |
| H  | 3.231950  | 0.216340  | 2.406943  | 3.174848     | 0.296005  | 2.403738  |
| C  | 0.681638  | 3.935354  | -0.943797 | 0.702274     | 3.933877  | -0.942831 |
| C  | 0.746904  | 2.950807  | -1.980453 | 0.753253     | 2.956725  | -1.987326 |
| C  | -0.701029 | 4.149013  | -0.609032 | -0.677144    | 4.157663  | -0.599370 |
| H  | 1.531842  | 4.454846  | -0.493526 | 1.559297     | 4.442295  | -0.492735 |
| C  | -0.599742 | 2.571585  | -2.312285 | -0.598470    | 2.592000  | -2.314934 |
| H  | 1.651981  | 2.554638  | -2.446381 | 1.652251     | 2.555080  | -2.459901 |
| C  | -1.494257 | 3.305618  | -1.475378 | -1.482168    | 3.328383  | -1.468550 |
| H  | -1.082660 | 4.869056  | 0.119067  | -1.048438    | 4.876677  | 0.135004  |
| H  | -0.887100 | 1.848382  | -3.077881 | -0.896190    | 1.877135  | -3.084253 |
| H  | -2.585541 | 3.256215  | -1.504096 | -2.573944    | 3.288997  | -1.491851 |

Table S13 Coordinates of  $\text{Cp}_3\text{Nb}_3(\text{CO})_8$  8-3  $C_7$

|    | MPW1PW91/SDD |           |           | MPW1PW91/LANL2DZ |           |           |
|----|--------------|-----------|-----------|------------------|-----------|-----------|
| Nb | 2.007116     | 0.104740  | -0.015060 | 2.011619         | 0.105669  | -0.014827 |
| Nb | -0.963696    | -1.493479 | -0.045169 | -0.964080        | -1.487419 | -0.039375 |
| Nb | -1.018130    | 1.572739  | -0.060991 | -1.023061        | 1.571189  | -0.065321 |
| C  | -0.507766    | -1.980729 | 1.925648  | -0.516043        | -1.998137 | 1.928583  |
| O  | -0.316536    | -2.344974 | 3.004757  | -0.321694        | -2.373462 | 3.002832  |
| C  | -1.900109    | 0.266500  | -1.414548 | -1.912662        | 0.274430  | -1.422282 |
| O  | -2.572231    | 0.063862  | -2.372271 | -2.591214        | 0.066582  | -2.371462 |
| C  | -1.295247    | 0.752838  | 1.808598  | -1.314337        | 0.723344  | 1.788999  |
| O  | -1.604215    | 0.618294  | 2.927250  | -1.632861        | 0.593393  | 2.906414  |
| C  | 0.881906     | 2.217411  | -0.712031 | 0.889955         | 2.219943  | -0.686333 |
| O  | 1.488987     | 3.085317  | -1.244854 | 1.490590         | 3.097388  | -1.208169 |
| C  | 1.246466     | -0.272295 | -1.954152 | 1.251271         | -0.272304 | -1.956461 |
| O  | 1.000051     | -0.436792 | -3.076924 | 1.004681         | -0.434195 | -3.078954 |
| C  | 1.458310     | 0.424127  | 2.016285  | 1.457274         | 0.415209  | 2.019449  |
| O  | 1.353411     | 0.580638  | 3.156063  | 1.342418         | 0.567403  | 3.158427  |
| C  | 1.944411     | -1.892051 | 0.461948  | 1.949337         | -1.893573 | 0.456481  |
| O  | 2.249849     | -2.982068 | 0.756623  | 2.257866         | -2.982454 | 0.749677  |
| C  | -2.883793    | -1.154062 | 0.610789  | -2.897108        | -1.168354 | 0.601741  |
| O  | -3.982849    | -1.041156 | 0.963098  | -3.999349        | -1.063969 | 0.943675  |
| C  | 4.129698     | -0.188752 | -1.070258 | 4.141671         | -0.174175 | -1.075199 |
| C  | 3.760813     | 1.187887  | -1.190924 | 3.771222         | 1.203722  | -1.183566 |
| C  | 4.347864     | -0.462398 | 0.308025  | 4.362371         | -0.459243 | 0.300426  |
| H  | 4.252192     | -0.893952 | -1.883288 | 4.267370         | -0.870723 | -1.894999 |
| C  | 3.756660     | 1.756572  | 0.114166  | 3.768912         | 1.761552  | 0.126270  |
| H  | 3.545154     | 1.719621  | -2.108595 | 3.555560         | 1.742857  | -2.096924 |
| C  | 4.120559     | 0.733655  | 1.035359  | 4.133777         | 0.730631  | 1.038692  |
| H  | 4.641911     | -1.415208 | 0.730521  | 4.658248         | -1.415200 | 0.714492  |
| H  | 3.528497     | 2.785835  | 0.356730  | 3.543634         | 2.789177  | 0.377836  |
| H  | 4.221808     | 0.849105  | 2.107804  | 4.237606         | 0.837758  | 2.111657  |
| C  | -1.172110    | 3.977997  | 0.191276  | -1.172059        | 3.981948  | 0.224473  |
| C  | -1.688706    | 3.632968  | -1.098363 | -1.675221        | 3.662611  | -1.077044 |
| C  | -2.014386    | 3.404751  | 1.169918  | -2.029282        | 3.395915  | 1.183037  |
| H  | -0.291120    | 4.578988  | 0.378704  | -0.290903        | 4.575709  | 0.433054  |
| C  | -2.856845    | 2.849903  | -0.905732 | -2.849897        | 2.882584  | -0.912079 |
| H  | -1.262053    | 3.926888  | -2.049739 | -1.235914        | 3.970908  | -2.018028 |
| C  | -3.055137    | 2.689177  | 0.495618  | -3.065707        | 2.698336  | 0.483953  |
| H  | -1.895274    | 3.487834  | 2.243282  | -1.922544        | 3.459628  | 2.259024  |
| H  | -3.488197    | 2.446476  | -1.687499 | -3.474450        | 2.496179  | -1.707857 |
| H  | -3.870783    | 2.155107  | 0.968197  | -3.890934        | 2.162466  | 0.937488  |
| C  | -2.298318    | -2.947565 | -1.371227 | -2.289044        | -2.950615 | -1.378867 |
| C  | -1.123816    | -2.700248 | -2.131959 | -1.115221        | -2.694135 | -2.138462 |
| C  | -1.913367    | -3.667418 | -0.194780 | -1.901716        | -3.674767 | -0.205326 |
| H  | -3.303402    | -2.664624 | -1.656233 | -3.295536        | -2.673553 | -1.664783 |
| C  | -0.020955    | -3.271261 | -1.442406 | -0.010189        | -3.264016 | -1.451148 |
| H  | -1.079333    | -2.148036 | -3.062262 | -1.073818        | -2.143035 | -3.069305 |
| C  | -0.499669    | -3.862728 | -0.245220 | -0.486657        | -3.863147 | -0.256666 |
| H  | -2.579337    | -4.042599 | 0.572449  | -2.566771        | -4.059980 | 0.557513  |
| H  | 1.009630     | -3.253001 | -1.771096 | 1.019998         | -3.241164 | -1.780560 |
| H  | 0.102919     | -4.387057 | 0.484923  | 0.117490         | -4.390076 | 0.470251  |

Table S14 Coordinates of  $\text{Cp}_3\text{Nb}_3(\text{CO})_8$  8-3  $C_1$

|    | BP86/SDD  |           |           | BP86/LANL2DZ |           |           |
|----|-----------|-----------|-----------|--------------|-----------|-----------|
| Nb | -2.024733 | -0.120548 | -0.016279 | 2.031526     | 0.111635  | -0.015377 |
| Nb | 0.957347  | 1.536232  | -0.041453 | -0.968188    | -1.525174 | -0.039209 |
| Nb | 1.019816  | -1.597493 | -0.067247 | -1.014605    | 1.603110  | -0.068896 |
| C  | 0.573196  | 1.910858  | 1.967871  | -0.596440    | -1.927629 | 1.966720  |
| O  | 0.423649  | 2.233881  | 3.087740  | -0.448761    | -2.264104 | 3.082510  |
| C  | 1.804336  | -0.215669 | -1.442389 | -1.815317    | 0.238302  | -1.448264 |
| O  | 2.408059  | -0.011003 | -2.467000 | -2.428273    | 0.031370  | -2.464263 |
| C  | 1.355108  | -0.823372 | 1.823252  | -1.377307    | 0.797398  | 1.804256  |
| O  | 1.685190  | -0.709494 | 2.955997  | -1.723103    | 0.686557  | 2.933253  |
| C  | -0.928416 | -2.271174 | -0.579723 | 0.949012     | 2.268234  | -0.549619 |
| O  | -1.563320 | -3.195888 | -1.022970 | 1.581722     | 3.200094  | -0.977508 |
| C  | -1.192211 | 0.264920  | -1.926980 | 1.191100     | -0.269540 | -1.924789 |
| O  | -0.942261 | 0.436350  | -3.070504 | 0.940133     | -0.437204 | -3.068187 |
| C  | -1.455605 | -0.526123 | 1.998026  | 1.453343     | 0.496891  | 2.001483  |
| O  | -1.355805 | -0.740724 | 3.148984  | 1.342828     | 0.697660  | 3.153631  |
| C  | -1.869727 | 1.862623  | 0.556524  | 1.869963     | -1.872956 | 0.552062  |
| O  | -2.198044 | 2.947751  | 0.920956  | 2.192281     | -2.958448 | 0.917849  |
| C  | 2.884806  | 1.144607  | 0.578134  | -2.906998    | -1.148112 | 0.562684  |
| O  | 4.008940  | 1.018582  | 0.913531  | -4.033911    | -1.026973 | 0.887635  |
| C  | -4.130853 | 0.181681  | -1.193528 | 4.143903     | -0.179423 | -1.201989 |
| C  | -3.812619 | -1.224668 | -1.185113 | 3.831084     | 1.228223  | -1.173525 |
| C  | -4.375803 | 0.587463  | 0.158099  | 4.389724     | -0.604780 | 0.143714  |
| H  | -4.191216 | 0.824204  | -2.075906 | 4.203264     | -0.808643 | -2.093699 |
| C  | -3.865524 | -1.681549 | 0.174860  | 3.887341     | 1.666113  | 0.192806  |
| H  | -3.581876 | -1.843053 | -2.055256 | 3.602616     | 1.859160  | -2.035112 |
| C  | -4.213784 | -0.556799 | 1.003287  | 4.231898     | 0.528411  | 1.005557  |
| H  | -4.637132 | 1.595613  | 0.489273  | 4.647560     | -1.618374 | 0.460539  |
| H  | -3.679743 | -2.702934 | 0.513453  | 3.707590     | 2.683567  | 0.545845  |
| H  | -4.346231 | -0.571708 | 2.088418  | 4.366572     | 0.528355  | 2.090317  |
| C  | 1.251660  | -4.029134 | 0.087380  | -1.227736    | 4.040333  | 0.147780  |
| C  | 1.721135  | -3.620194 | -1.212382 | -1.663342    | 3.675199  | -1.176895 |
| C  | 2.113471  | -3.458606 | 1.071528  | -2.125914    | 3.452159  | 1.088813  |
| H  | 0.381242  | -4.660622 | 0.280217  | -0.356664    | 4.655442  | 0.385239  |
| C  | 2.881284  | -2.797500 | -1.024193 | -2.837724    | 2.861331  | -1.047411 |
| H  | 1.267733  | -3.889209 | -2.170211 | -1.177761    | 3.965372  | -2.112366 |
| C  | 3.123432  | -2.685496 | 0.387164  | -3.123718    | 2.711930  | 0.352808  |
| H  | 2.027078  | -3.582807 | 2.153940  | -2.070012    | 3.543542  | 2.176422  |
| H  | 3.481005  | -2.343652 | -1.816784 | -3.418561    | 2.436563  | -1.869665 |
| H  | 3.942074  | -2.135439 | 0.858775  | -3.962399    | 2.158840  | 0.783808  |
| C  | 2.282555  | 3.047375  | -1.368977 | -2.288173    | -3.041367 | -1.380011 |
| C  | 1.081280  | 2.827808  | -2.119558 | -1.086757    | -2.817418 | -2.129882 |
| C  | 1.922394  | 3.737047  | -0.151283 | -1.927896    | -3.736591 | -0.164709 |
| H  | 3.289887  | 2.764688  | -1.682721 | -3.295883    | -2.760886 | -1.694275 |
| C  | -0.014501 | 3.382302  | -1.380740 | 0.009306     | -3.374411 | -1.393056 |
| H  | 1.012492  | 2.298326  | -3.072890 | -1.018739    | -2.287741 | -3.082803 |
| C  | 0.497419  | 3.939407  | -0.164995 | -0.502227    | -3.937350 | -0.179568 |
| H  | 2.612023  | 4.081234  | 0.623534  | -2.617700    | -4.087721 | 0.606538  |
| H  | -1.062194 | 3.373161  | -1.688434 | 1.056812     | -3.362741 | -1.700860 |
| H  | -0.094240 | 4.435891  | 0.607250  | 0.089169     | -4.438445 | 0.589705  |

Table S15 Coordinates of  $\text{Cp}_3\text{Nb}_3(\text{CO})_8$  8-4  $C_7$

|    | MPW1PW91/SDD |           |           | MPW1PW91/LANL2DZ |           |           |
|----|--------------|-----------|-----------|------------------|-----------|-----------|
| Nb | -1.511126    | -1.294812 | 0.006743  | -1.510505        | -1.300717 | 0.018319  |
| Nb | 1.858298     | -0.378572 | -0.014184 | 1.850510         | -0.369485 | -0.010040 |
| Nb | -0.688691    | 1.669446  | 0.023226  | -0.700208        | 1.660489  | 0.025074  |
| C  | -1.167339    | -3.309834 | -0.261190 | -1.185930        | -3.304373 | -0.361919 |
| C  | 2.984239     | 1.305391  | 0.298878  | 2.964404         | 1.314033  | 0.375143  |
| C  | -1.155533    | 1.216100  | -1.981706 | -1.240371        | 1.255728  | -1.982553 |
| C  | -0.683256    | 0.982563  | 1.998357  | -0.579094        | 0.915247  | 1.973035  |
| C  | 1.777323     | -0.105229 | 2.080072  | 1.847682         | -0.249250 | 2.108988  |
| C  | 1.426287     | 0.800990  | -1.680902 | 1.343014         | 0.884669  | -1.601404 |
| C  | -0.460870    | -1.850227 | 1.696360  | -0.407913        | -1.945936 | 1.639331  |
| C  | -0.561544    | -1.442909 | -1.830781 | -0.596094        | -1.387201 | -1.841673 |
| O  | -0.998712    | -4.450026 | -0.412811 | -1.022293        | -4.434167 | -0.577964 |
| O  | 3.681764     | 2.220395  | 0.469424  | 3.643115         | 2.233741  | 0.584210  |
| O  | -1.497726    | 1.162708  | -3.086423 | -1.605699        | 1.219817  | -3.078779 |
| O  | -0.816230    | 0.835859  | 3.143651  | -0.653796        | 0.755531  | 3.122971  |
| O  | 2.015204     | 0.032506  | 3.202125  | 2.138084         | -0.206526 | 3.224972  |
| O  | 1.600590     | 1.363561  | -2.694185 | 1.535386         | 1.451452  | -2.613413 |
| O  | -0.089598    | -2.305959 | 2.703297  | -0.017243        | -2.453744 | 2.613913  |
| O  | -0.194980    | -1.657317 | -2.916143 | -0.242253        | -1.564668 | -2.937495 |
| C  | -3.846044    | -1.665030 | -0.506391 | -3.884568        | -1.645285 | -0.393723 |
| C  | -3.696047    | -1.720349 | 0.923505  | -3.667557        | -1.721189 | 1.026670  |
| C  | -3.555378    | -0.351285 | -0.928135 | -3.602860        | -0.329533 | -0.813016 |
| C  | -3.311927    | -0.435963 | 1.372281  | -3.249956        | -0.446400 | 1.473979  |
| C  | -3.168699    | 0.410933  | 0.223166  | -3.153974        | 0.413607  | 0.328678  |
| C  | 0.077997     | 3.615348  | 1.170463  | 0.144483         | 3.580951  | 1.171460  |
| C  | 0.715409     | 3.666930  | -0.096907 | 0.700300         | 3.664762  | -0.132909 |
| C  | -1.340064    | 3.695828  | 0.959818  | -1.283218        | 3.675606  | 1.054354  |
| C  | -0.281842    | 3.760841  | -1.097542 | -0.359555        | 3.795765  | -1.063502 |
| C  | -1.560328    | 3.784207  | -0.452565 | -1.592264        | 3.807113  | -0.337111 |
| C  | 2.831611     | -1.870556 | -1.641031 | 2.798779         | -1.724675 | -1.777079 |
| C  | 3.853818     | -1.067519 | -1.053507 | 3.827587         | -0.951451 | -1.161983 |
| C  | 2.302914     | -2.713321 | -0.628854 | 2.313385         | -2.648495 | -0.814814 |
| C  | 3.945315     | -1.416108 | 0.332825  | 3.968677         | -1.401003 | 0.191055  |
| C  | 2.973970     | -2.431378 | 0.590634  | 3.018548         | -2.447028 | 0.402148  |
| H  | -4.164724    | -2.479460 | -1.145422 | -4.237020        | -2.449705 | -1.027808 |
| H  | -3.887713    | -2.581639 | 1.551590  | -3.838046        | -2.589239 | 1.651521  |
| H  | -3.588300    | 0.009011  | -1.948245 | -3.682376        | 0.044790  | -1.825443 |
| H  | -3.137160    | -0.146758 | 2.400463  | -3.031110        | -0.169606 | 2.496863  |
| H  | -3.052143    | 1.506872  | 0.252467  | -3.037265        | 1.509445  | 0.367339  |
| H  | 0.578198     | 3.565750  | 2.129524  | 0.704206         | 3.498803  | 2.094575  |
| H  | 1.782124     | 3.630312  | -0.271965 | 1.752680         | 3.627605  | -0.379722 |
| H  | -2.092140    | 3.760557  | 1.736965  | -1.983930        | 3.724381  | 1.879107  |
| H  | -0.099906    | 3.818744  | -2.163811 | -0.246497        | 3.883522  | -2.137144 |
| H  | -2.514454    | 3.912210  | -0.950549 | -2.576093        | 3.951743  | -0.768535 |
| H  | 2.519785     | -1.853574 | -2.677787 | 2.456600         | -1.636755 | -2.800359 |
| H  | 4.482421     | -0.359355 | -1.578945 | 4.428475         | -0.195782 | -1.652416 |
| H  | 1.518918     | -3.446954 | -0.761649 | 1.535372         | -3.382578 | -0.978434 |
| H  | 4.659809     | -1.025054 | 1.046653  | 4.702053         | -1.055309 | 0.909080  |
| H  | 2.794957     | -2.919548 | 1.540964  | 2.877817         | -3.008592 | 1.317649  |

Table S16 Coordinates of  $\text{Cp}_3\text{Nb}_3(\text{CO})_8$  8-4  $C_7$

|    | BP86/SDD  |           |           | BP86/LANL2DZ |           |           |
|----|-----------|-----------|-----------|--------------|-----------|-----------|
| Nb | -1.621629 | -1.189627 | 0.050438  | -1.596428    | -1.223175 | 0.053665  |
| Nb | 1.840118  | -0.522781 | 0.017569  | 1.849210     | -0.485918 | 0.028588  |
| Nb | -0.544412 | 1.761688  | 0.001658  | -0.590779    | 1.745237  | -0.003130 |
| C  | -1.529930 | -3.188728 | -0.462028 | -1.459903    | -3.214279 | -0.486642 |
| C  | 3.138003  | 1.017344  | 0.457613  | 3.121113     | 1.077073  | 0.469980  |
| C  | -1.335176 | 1.471784  | -1.932720 | -1.371036    | 1.457143  | -1.947275 |
| C  | -0.292636 | 0.762774  | 1.822916  | -0.310959    | 0.733297  | 1.810091  |
| C  | 2.002219  | -0.658467 | 2.100695  | 2.014917     | -0.625184 | 2.111417  |
| C  | 1.211396  | 0.963922  | -1.420473 | 1.183550     | 1.000518  | -1.404974 |
| C  | -0.477462 | -2.055668 | 1.548571  | -0.431100    | -2.084676 | 1.538362  |
| C  | -0.863747 | -1.251602 | -1.885896 | -0.820961    | -1.255639 | -1.876962 |
| O  | -1.503389 | -4.332448 | -0.755397 | -1.404989    | -4.351915 | -0.797465 |
| O  | 3.911359  | 1.875471  | 0.704026  | 3.877579     | 1.949472  | 0.716354  |
| O  | -1.777013 | 1.514828  | -3.022135 | -1.802140    | 1.498109  | -3.040184 |
| O  | -0.334355 | 0.628590  | 3.006326  | -0.355677    | 0.608603  | 2.994811  |
| O  | 2.345283  | -0.811057 | 3.215170  | 2.362131     | -0.780151 | 3.224055  |
| O  | 1.564094  | 1.434016  | -2.475438 | 1.540627     | 1.473508  | -2.455568 |
| O  | -0.115067 | -2.691148 | 2.480989  | -0.052185    | -2.722662 | 2.462191  |
| O  | -0.587744 | -1.402256 | -3.026000 | -0.538733    | -1.392815 | -3.017214 |
| C  | -4.054458 | -1.363345 | -0.176762 | -4.036898    | -1.443804 | -0.172072 |
| C  | -3.725269 | -1.485486 | 1.230965  | -3.706252    | -1.556375 | 1.236392  |
| C  | -3.711590 | -0.051270 | -0.602997 | -3.720189    | -0.126140 | -0.601709 |
| C  | -3.175600 | -0.241154 | 1.666382  | -3.180239    | -0.301273 | 1.669605  |
| C  | -3.118348 | 0.641925  | 0.519203  | -3.140990    | 0.580272  | 0.519899  |
| C  | 0.453171  | 3.551302  | 1.306286  | 0.375007     | 3.553454  | 1.320833  |
| C  | 1.014835  | 3.656336  | -0.007395 | 0.944480     | 3.670057  | 0.010924  |
| C  | -0.968946 | 3.761356  | 1.201844  | -1.048303    | 3.743403  | 1.207296  |
| C  | -0.042158 | 3.930285  | -0.933812 | -0.110733    | 3.933996  | -0.921787 |
| C  | -1.278148 | 4.000940  | -0.189008 | -1.352154    | 3.984644  | -0.184630 |
| C  | 2.510833  | -1.666306 | -2.039465 | 2.551579     | -1.599228 | -2.050458 |
| C  | 3.660109  | -1.063422 | -1.423109 | 3.685117     | -0.974218 | -1.427238 |
| C  | 2.028376  | -2.687977 | -1.159435 | 2.093536     | -2.640818 | -1.180564 |
| C  | 3.885793  | -1.721981 | -0.154148 | 3.926757     | -1.640036 | -0.164045 |
| C  | 2.859977  | -2.718846 | 0.009523  | 2.925509     | -2.662694 | -0.010803 |
| H  | -4.511778 | -2.137461 | -0.798493 | -4.477087    | -2.228918 | -0.792394 |
| H  | -3.902976 | -2.362880 | 1.858150  | -3.866404    | -2.436248 | 1.864687  |
| H  | -3.836807 | 0.349671  | -1.611396 | -3.854807    | 0.271031  | -1.610204 |
| H  | -2.839681 | -0.001050 | 2.677458  | -2.852793    | -0.050964 | 2.680653  |
| H  | -2.916592 | 1.732629  | 0.561574  | -2.964034    | 1.674844  | 0.561492  |
| H  | 1.005190  | 3.351701  | 2.227723  | 0.922279     | 3.354716  | 2.245156  |
| H  | 2.069085  | 3.533679  | -0.263921 | 2.002386     | 3.566036  | -0.238321 |
| H  | -1.672350 | 3.782842  | 2.039238  | -1.757648    | 3.751989  | 2.039761  |
| H  | 0.074928  | 4.062812  | -2.012238 | 0.011376     | 4.074591  | -1.998461 |
| H  | -2.259703 | 4.246360  | -0.604515 | -2.334433    | 4.218968  | -0.604649 |
| H  | 2.079628  | -1.393276 | -3.004869 | 2.114326     | -1.327430 | -3.013159 |
| H  | 4.276576  | -0.275435 | -1.862614 | 4.283931     | -0.168849 | -1.859241 |
| H  | 1.167278  | -3.334180 | -1.341999 | 1.248918     | -3.306399 | -1.370480 |
| H  | 4.708915  | -1.529995 | 0.538685  | 4.746310     | -1.436940 | 0.529721  |
| H  | 2.748308  | -3.396134 | 0.860123  | 2.831588     | -3.352446 | 0.831705  |

Table S17 Coordinates of  $\text{Cp}_3\text{Nb}_3(\text{CO})_7$  7-1  $C_1$

|    | MPW1PW91/SDD |           |           | MPW1PW91/LANL2DZ |           |           |
|----|--------------|-----------|-----------|------------------|-----------|-----------|
| Nb | 1.121988     | 1.451168  | -0.153930 | 1.147492         | 1.428934  | -0.155702 |
| Nb | -1.931333    | 0.133905  | -0.105171 | -1.924864        | 0.164759  | -0.106697 |
| Nb | 0.864113     | -1.556695 | -0.242616 | 0.833295         | -1.567791 | -0.246047 |
| C  | -0.363790    | 0.101630  | -1.343556 | -0.364141        | 0.109960  | -1.359294 |
| C  | -0.256040    | -1.639845 | 1.495446  | -0.302299        | -1.621475 | 1.483730  |
| C  | -0.523487    | -2.736927 | -1.206905 | -0.578227        | -2.728097 | -1.208663 |
| C  | 3.057051     | 0.838903  | -0.400371 | 3.070818         | 0.781119  | -0.432728 |
| C  | 1.504865     | 0.712389  | 1.712341  | 1.527192         | 0.665366  | 1.702540  |
| C  | -2.405966    | 1.949526  | -0.947259 | -2.353450        | 1.989735  | -0.959720 |
| C  | -1.441498    | 1.152460  | 1.634407  | -1.406950        | 1.183056  | 1.625336  |
| O  | 0.738613     | 0.057169  | -1.954121 | 0.720902         | 0.052658  | -1.986928 |
| O  | -0.673801    | -1.919018 | 2.547578  | -0.717789        | -1.894093 | 2.538587  |
| O  | -1.226886    | -3.500170 | -1.730027 | -1.294293        | -3.479951 | -1.728989 |
| O  | 4.196361     | 0.642886  | -0.549370 | 4.202863         | 0.563964  | -0.599415 |
| O  | 1.816888     | 0.438372  | 2.804042  | 1.835718         | 0.381762  | 2.792274  |
| O  | -2.737145    | 2.925305  | -1.480457 | -2.659749        | 2.968633  | -1.500832 |
| O  | -1.415780    | 1.690849  | 2.665019  | -1.368563        | 1.719737  | 2.656180  |
| C  | 1.969255     | 3.414780  | -1.177758 | 2.041372         | 3.398269  | -1.144563 |
| C  | 0.551039     | 3.531832  | -1.283106 | 0.627233         | 3.549308  | -1.259778 |
| C  | 2.308352     | 3.477950  | 0.213268  | 2.369870         | 3.429932  | 0.250448  |
| H  | 2.669530     | 3.356249  | -2.001967 | 2.746669         | 3.341840  | -1.964600 |
| C  | 0.026015     | 3.660678  | 0.029292  | 0.093167         | 3.667203  | 0.049483  |
| H  | -0.024142    | 3.535746  | -2.201303 | 0.061051         | 3.582772  | -2.182902 |
| C  | 1.101413     | 3.607914  | 0.952886  | 1.158841         | 3.572587  | 0.982268  |
| H  | 3.307973     | 3.458230  | 0.629482  | 3.365355         | 3.382242  | 0.674447  |
| H  | -1.015565    | 3.783942  | 0.291936  | -0.947986        | 3.808985  | 0.304499  |
| H  | 1.014519     | 3.679249  | 2.030143  | 1.064702         | 3.632207  | 2.059536  |
| C  | -4.213028    | -0.172106 | -0.805838 | -4.224261        | -0.095578 | -0.797998 |
| C  | -3.595135    | -1.445102 | -0.930400 | -3.637453        | -1.383192 | -0.922174 |
| C  | -4.240660    | 0.171844  | 0.585334  | -4.239221        | 0.252306  | 0.592646  |
| H  | -4.641813    | 0.406811  | -1.614391 | -4.641986        | 0.491566  | -1.606487 |
| C  | -3.235623    | -1.884995 | 0.372496  | -3.284140        | -1.828604 | 0.380794  |
| H  | -3.426532    | -1.986343 | -1.852805 | -3.488511        | -1.931299 | -1.843798 |
| C  | -3.626180    | -0.890878 | 1.309162  | -3.648128        | -0.823126 | 1.316834  |
| H  | -4.676855    | 1.066114  | 1.013284  | -4.652961        | 1.157455  | 1.019982  |
| H  | -2.747522    | -2.820828 | 0.612199  | -2.817711        | -2.775315 | 0.621388  |
| H  | -3.492164    | -0.944030 | 2.382453  | -3.512920        | -0.877320 | 2.389819  |
| C  | 2.163671     | -3.389014 | -1.018201 | 2.098978         | -3.446617 | -0.991363 |
| C  | 3.087291     | -2.326287 | -0.820748 | 3.048661         | -2.404145 | -0.812780 |
| C  | 1.612639     | -3.734380 | 0.263419  | 1.539330         | -3.755666 | 0.295878  |
| H  | 1.953341     | -3.883643 | -1.958124 | 1.878239         | -3.953080 | -1.922619 |
| C  | 3.124442     | -2.019055 | 0.565506  | 3.093456         | -2.073029 | 0.567668  |
| H  | 3.660677     | -1.828679 | -1.593367 | 3.635319         | -1.936675 | -1.594211 |
| C  | 2.210133     | -2.874907 | 1.234159  | 2.156688         | -2.892815 | 1.251665  |
| H  | 0.925006     | -4.544653 | 0.469476  | 0.832577         | -4.545657 | 0.515840  |
| H  | 3.742676     | -1.269360 | 1.038876  | 3.731009         | -1.331203 | 1.027664  |
| H  | 2.030820     | -2.893919 | 2.301752  | 1.977541         | -2.889152 | 2.319375  |

Table S18 Coordinates of  $\text{Cp}_3\text{Nb}_3(\text{CO})_7$  7-1  $C_1$

|    | BP86/SDD  |           |           | BP86/LANL2DZ |           |           |
|----|-----------|-----------|-----------|--------------|-----------|-----------|
| Nb | 1.148790  | 1.458599  | -0.156370 | 1.170859     | 1.439125  | -0.158107 |
| Nb | -1.942618 | 0.148130  | -0.093856 | -1.936873    | 0.173590  | -0.096410 |
| Nb | 0.856671  | -1.585623 | -0.247768 | 0.831039     | -1.594578 | -0.252426 |
| C  | -0.356552 | 0.115853  | -1.339043 | -0.356720    | 0.122364  | -1.354380 |
| C  | -0.294588 | -1.618059 | 1.480937  | -0.331120    | -1.599543 | 1.470033  |
| C  | -0.535205 | -2.748577 | -1.225982 | -0.584501    | -2.738853 | -1.224425 |
| C  | 3.078765  | 0.815830  | -0.395617 | 3.087717     | 0.763084  | -0.425388 |
| C  | 1.522990  | 0.721004  | 1.724354  | 1.544754     | 0.679390  | 1.714695  |
| C  | -2.412893 | 1.970424  | -0.933185 | -2.364471    | 2.002110  | -0.948734 |
| C  | -1.440578 | 1.186038  | 1.637330  | -1.410185    | 1.213863  | 1.625734  |
| O  | 0.755290  | 0.066171  | -1.974681 | 0.735151     | 0.066441  | -2.011320 |
| O  | -0.705841 | -1.910200 | 2.556312  | -0.739232    | -1.885334 | 2.548199  |
| O  | -1.248112 | -3.520698 | -1.769517 | -1.310579    | -3.501259 | -1.762460 |
| O  | 4.236309  | 0.604428  | -0.543722 | 4.238898     | 0.532765  | -0.588971 |
| O  | 1.836384  | 0.451685  | 2.836137  | 1.856938     | 0.400038  | 2.823900  |
| O  | -2.749272 | 2.964828  | -1.472830 | -2.677630    | 2.998939  | -1.496817 |
| O  | -1.424797 | 1.742705  | 2.681256  | -1.383631    | 1.770878  | 2.668990  |
| C  | 2.002472  | 3.427593  | -1.216905 | 2.069710     | 3.415289  | -1.181860 |
| C  | 0.570537  | 3.551360  | -1.306292 | 0.641689     | 3.571178  | -1.284462 |
| C  | 2.362971  | 3.503094  | 0.181367  | 2.416584     | 3.460250  | 0.221470  |
| H  | 2.698817  | 3.351863  | -2.056060 | 2.772742     | 3.341971  | -2.015505 |
| C  | 0.057858  | 3.695061  | 0.023330  | 0.116760     | 3.703284  | 0.040931  |
| H  | -0.022309 | 3.546888  | -2.224945 | 0.059501     | 3.592841  | -2.209563 |
| C  | 1.154947  | 3.643281  | 0.942104  | 1.202278     | 3.610994  | 0.971671  |
| H  | 3.376908  | 3.476378  | 0.588177  | 3.425324     | 3.406321  | 0.638407  |
| H  | -0.990366 | 3.821241  | 0.298752  | -0.932081    | 3.844642  | 0.306283  |
| H  | 1.081584  | 3.721395  | 2.029783  | 1.118982     | 3.676210  | 2.059314  |
| C  | -4.241458 | -0.152372 | -0.828692 | -4.253911    | -0.085052 | -0.817983 |
| C  | -3.620632 | -1.438712 | -0.947333 | -3.663316    | -1.385836 | -0.934181 |
| C  | -4.287767 | 0.193240  | 0.575385  | -4.286423    | 0.267623  | 0.585036  |
| H  | -4.659452 | 0.436080  | -1.649255 | -4.661779    | 0.509369  | -1.639315 |
| C  | -3.276707 | -1.884096 | 0.371986  | -3.323996    | -1.833501 | 0.385819  |
| H  | -3.436634 | -1.985037 | -1.875472 | -3.497892    | -1.940317 | -1.860780 |
| C  | -3.679739 | -0.879763 | 1.312773  | -3.700293    | -0.816065 | 1.324353  |
| H  | -4.724589 | 1.100398  | 1.000754  | -4.699923    | 1.186547  | 1.008263  |
| H  | -2.786069 | -2.828129 | 0.618529  | -2.852586    | -2.786789 | 0.634452  |
| H  | -3.553282 | -0.931000 | 2.396963  | -3.570572    | -0.865574 | 2.408041  |
| C  | 2.166268  | -3.450103 | -1.006155 | 2.106398     | -3.504427 | -0.981214 |
| C  | 3.101261  | -2.382541 | -0.796786 | 3.067424     | -2.456907 | -0.790587 |
| C  | 1.588889  | -3.790526 | 0.280185  | 1.521695     | -3.809091 | 0.310775  |
| H  | 1.959394  | -3.948303 | -1.956387 | 1.887841     | -4.013311 | -1.923113 |
| C  | 3.121001  | -2.068692 | 0.602305  | 3.096233     | -2.119909 | 0.602815  |
| H  | 3.693477  | -1.884220 | -1.568697 | 3.670773     | -1.986993 | -1.571575 |
| C  | 2.182048  | -2.923829 | 1.265602  | 2.135406     | -2.939088 | 1.281355  |
| H  | 0.881655  | -4.598929 | 0.478966  | 0.795279     | -4.596750 | 0.523158  |
| H  | 3.741673  | -1.311939 | 1.083887  | 3.735061     | -1.369758 | 1.070693  |
| H  | 1.979604  | -2.936408 | 2.339136  | 1.933739     | -2.928697 | 2.354888  |

Table S19 Coordinates of  $\text{Cp}_3\text{Nb}_3(\text{CO})_7$  7-2  $C_1$

|    | MPW1PW91/SDD |           |           | MPW1PW91/LANL2DZ |           |           |
|----|--------------|-----------|-----------|------------------|-----------|-----------|
| Nb | -1.672456    | -0.742933 | -0.151791 | -1.687738        | -0.704882 | -0.148880 |
| Nb | 1.669630     | -0.957732 | -0.112532 | 1.650742         | -0.986776 | -0.116698 |
| Nb | 0.013196     | 1.804179  | -0.218261 | 0.047430         | 1.798179  | -0.221197 |
| O  | -1.914400    | -0.140582 | 3.004448  | -1.926598        | -0.079670 | 3.004540  |
| C  | -1.766753    | -0.312971 | 1.868726  | -1.780319        | -0.259687 | 1.870308  |
| O  | -4.185308    | 1.241465  | -0.461614 | -4.158544        | 1.326965  | -0.502972 |
| C  | -3.228074    | 0.606213  | -0.315151 | -3.216748        | 0.673756  | -0.340567 |
| C  | -1.665753    | 2.492234  | 0.748168  | -1.624506        | 2.529052  | 0.734410  |
| O  | -2.499132    | 3.021647  | 1.361783  | -2.449839        | 3.077947  | 1.340332  |
| C  | 0.626479     | 1.375726  | 1.708822  | 0.648682         | 1.345718  | 1.705757  |
| O  | 0.978404     | 1.304456  | 2.814624  | 1.000675         | 1.264906  | 2.810386  |
| C  | 0.723478     | -1.992210 | 1.403939  | 0.681589         | -2.012821 | 1.391106  |
| O  | 0.432155     | -2.658243 | 2.315081  | 0.377417         | -2.674050 | 2.301090  |
| O  | 1.350879     | -3.434246 | -2.123770 | 1.250562         | -3.428422 | -2.156806 |
| C  | 1.440566     | -2.556542 | -1.368282 | 1.369117         | -2.564704 | -1.389859 |
| O  | -0.756903    | 0.393659  | -1.849449 | -0.745382        | 0.392114  | -1.871025 |
| C  | 0.262432     | -0.150827 | -1.277644 | 0.257088         | -0.157434 | -1.286370 |
| H  | -4.005394    | -1.526624 | -1.996860 | -4.053974        | -1.470738 | -1.972444 |
| C  | -3.330864    | -1.995254 | -1.291454 | -3.382763        | -1.943071 | -1.266319 |
| C  | -2.103154    | -2.648352 | -1.609239 | -2.172191        | -2.625747 | -1.587338 |
| C  | -3.556003    | -2.155983 | 0.115471  | -3.599374        | -2.083196 | 0.144236  |
| C  | -1.575899    | -3.200775 | -0.418130 | -1.646060        | -3.176517 | -0.394954 |
| H  | -1.645153    | -2.702362 | -2.589858 | -1.725835        | -2.702012 | -2.571733 |
| C  | -2.453441    | -2.880938 | 0.652221  | -2.506750        | -2.824783 | 0.680177  |
| H  | -4.423674    | -1.817175 | 0.667753  | -4.455148        | -1.720264 | 0.699774  |
| H  | -0.655807    | -3.761307 | -0.329460 | -0.736901        | -3.754943 | -0.308582 |
| H  | -2.319711    | -3.172846 | 1.686550  | -2.373127        | -3.112289 | 1.715681  |
| C  | 3.587243     | 0.133234  | 1.007752  | 3.606105         | 0.045960  | 1.022354  |
| C  | 3.500966     | -1.176967 | 1.533262  | 3.486832         | -1.267978 | 1.532658  |
| C  | 3.863527     | 0.039481  | -0.387083 | 3.879350         | -0.038769 | -0.373992 |
| H  | 3.468085     | 1.041253  | 1.584155  | 3.510275         | 0.950143  | 1.609079  |
| C  | 3.724358     | -2.096955 | 0.467695  | 3.686792         | -2.180858 | 0.456250  |
| H  | 3.305821     | -1.431253 | 2.567738  | 3.285791         | -1.529542 | 2.564141  |
| C  | 3.956150     | -1.338844 | -0.725826 | 3.937811         | -1.414877 | -0.728184 |
| H  | 4.015162     | 0.869116  | -1.066291 | 4.058005         | 0.793940  | -1.042690 |
| H  | 3.758821     | -3.175748 | 0.556243  | 3.692963         | -3.261245 | 0.531861  |
| H  | 4.215021     | -1.741717 | -1.697093 | 4.186497         | -1.812595 | -1.704281 |
| C  | 0.862882     | 3.988578  | 0.168802  | 0.957014         | 3.959893  | 0.197823  |
| C  | 1.953984     | 3.175121  | -0.273857 | 2.028963         | 3.124215  | -0.251468 |
| C  | -0.051779    | 4.122242  | -0.921977 | 0.053339         | 4.134696  | -0.896646 |
| H  | 0.771560     | 4.465567  | 1.136653  | 0.874887         | 4.428012  | 1.170797  |
| C  | 1.704485     | 2.811089  | -1.628548 | 1.776851         | 2.784706  | -1.611749 |
| H  | 2.841362     | 2.940466  | 0.298479  | 2.906814         | 2.858905  | 0.321730  |
| C  | 0.468863     | 3.395476  | -2.019219 | 0.559000         | 3.407927  | -2.001044 |
| H  | -0.974245    | 4.689078  | -0.915449 | -0.853180        | 4.726974  | -0.887161 |
| H  | 2.332213     | 2.191674  | -2.256510 | 2.391751         | 2.157634  | -2.244751 |
| H  | -0.016989    | 3.265928  | -2.979589 | 0.078125         | 3.309438  | -2.967501 |

Table S20 Coordinates of  $\text{Cp}_3\text{Nb}_3(\text{CO})_7$  7-2  $C_1$

|    | BP86/SDD  |           |           | BP86/LANL2DZ |           |           |
|----|-----------|-----------|-----------|--------------|-----------|-----------|
| Nb | -1.732947 | -0.678178 | -0.150106 | -1.744019    | -0.648245 | -0.148540 |
| Nb | 1.637275  | -1.042347 | -0.104841 | 1.624706     | -1.063552 | -0.108577 |
| Nb | 0.101815  | 1.824982  | -0.217915 | 0.126855     | 1.816462  | -0.221736 |
| O  | -1.943224 | -0.064047 | 3.030845  | -1.957906    | -0.007592 | 3.027785  |
| C  | -1.800211 | -0.238608 | 1.875468  | -1.813833    | -0.191642 | 1.874426  |
| O  | -4.165791 | 1.438972  | -0.447025 | -4.136131    | 1.507456  | -0.497667 |
| C  | -3.220874 | 0.749661  | -0.303866 | -3.205797    | 0.803361  | -0.335254 |
| C  | -1.551390 | 2.581691  | 0.755499  | -1.520474    | 2.600687  | 0.744333  |
| O  | -2.370367 | 3.165703  | 1.375764  | -2.332289    | 3.197750  | 1.360603  |
| C  | 0.700829  | 1.350858  | 1.708273  | 0.712626     | 1.318586  | 1.703375  |
| O  | 1.060969  | 1.273565  | 2.832319  | 1.069677     | 1.233343  | 2.827431  |
| C  | 0.637477  | -2.042123 | 1.407524  | 0.609425     | -2.062052 | 1.394760  |
| O  | 0.323199  | -2.711552 | 2.334555  | 0.283766     | -2.730022 | 2.318290  |
| O  | 1.216935  | -3.511997 | -2.143531 | 1.139778     | -3.504800 | -2.167406 |
| C  | 1.339521  | -2.627340 | -1.369563 | 1.286002     | -2.631336 | -1.385445 |
| O  | -0.761074 | 0.437601  | -1.856816 | -0.746380    | 0.425819  | -1.884352 |
| C  | 0.241506  | -0.166683 | -1.269284 | 0.239376     | -0.175470 | -1.278645 |
| H  | -4.113672 | -1.362779 | -2.020512 | -4.151732    | -1.324370 | -1.998258 |
| C  | -3.454936 | -1.870430 | -1.311916 | -3.496570    | -1.832611 | -1.286872 |
| C  | -2.242660 | -2.576557 | -1.634477 | -2.299987    | -2.565273 | -1.609269 |
| C  | -3.690968 | -2.030968 | 0.106377  | -3.725099    | -1.970115 | 0.135137  |
| C  | -1.734296 | -3.159821 | -0.434206 | -1.792984    | -3.142717 | -0.405668 |
| H  | -1.780383 | -2.643309 | -2.623295 | -1.847613    | -2.653529 | -2.600769 |
| C  | -2.607597 | -2.806245 | 0.646543  | -2.650660    | -2.757331 | 0.677851  |
| H  | -4.550455 | -1.651949 | 0.664614  | -4.572852    | -1.567521 | 0.694683  |
| H  | -0.824225 | -3.754699 | -0.345822 | -0.893228    | -3.752903 | -0.316729 |
| H  | -2.484300 | -3.107983 | 1.689648  | -2.527213    | -3.050810 | 1.723140  |
| C  | 3.624088  | -0.032267 | 1.021919  | 3.639412     | -0.098211 | 1.037242  |
| C  | 3.491991  | -1.357807 | 1.535396  | 3.488342     | -1.429418 | 1.531287  |
| C  | 3.884601  | -0.118245 | -0.389927 | 3.894347     | -0.167405 | -0.376829 |
| H  | 3.538034  | 0.880088  | 1.615765  | 3.566876     | 0.807199  | 1.643358  |
| C  | 3.673792  | -2.278682 | 0.446459  | 3.653554     | -2.336698 | 0.428303  |
| H  | 3.289929  | -1.621232 | 2.576525  | 3.283789     | -1.705492 | 2.568532  |
| C  | 3.922181  | -1.506867 | -0.751090 | 3.910880     | -1.551007 | -0.758244 |
| H  | 4.063484  | 0.721915  | -1.065585 | 4.088214     | 0.679380  | -1.039652 |
| H  | 3.661843  | -3.369037 | 0.518816  | 3.623036     | -3.427710 | 0.484034  |
| H  | 4.154938  | -1.910271 | -1.739645 | 4.134572     | -1.942857 | -1.753488 |
| C  | 1.065428  | 3.986452  | 0.169254  | 1.122890     | 3.963766  | 0.202295  |
| C  | 2.121850  | 3.111714  | -0.284063 | 2.172483     | 3.080919  | -0.252196 |
| C  | 0.143533  | 4.166738  | -0.925116 | 0.216924     | 4.173492  | -0.900777 |
| H  | 0.999699  | 4.465258  | 1.149230  | 1.054194     | 4.431506  | 1.187278  |
| C  | 1.845745  | 2.759908  | -1.650768 | 1.906659     | 2.750769  | -1.626023 |
| H  | 3.006965  | 2.831325  | 0.289794  | 3.047039     | 2.779945  | 0.327281  |
| C  | 0.625812  | 3.409860  | -2.036958 | 0.700010     | 3.423536  | -2.017219 |
| H  | -0.759814 | 4.781137  | -0.910130 | -0.677171    | 4.801515  | -0.887850 |
| H  | 2.444237  | 2.102487  | -2.286286 | 2.503441     | 2.093874  | -2.263541 |
| H  | 0.124138  | 3.304969  | -3.003518 | 0.210146     | 3.341899  | -2.991888 |

Table S21 Coordinates of  $\text{Cp}_3\text{Nb}_3(\text{CO})_7$  7-3  $\text{C}_3$

|    | MPW1PW91/SDD |           |           | MPW1PW91/LANL2DZ |           |           |
|----|--------------|-----------|-----------|------------------|-----------|-----------|
| Nb | 0.000000     | 1.730850  | 0.060310  | 0.000000         | 1.724313  | 0.059678  |
| Nb | 1.498960     | -0.865425 | 0.060310  | 1.493299         | -0.862157 | 0.059678  |
| Nb | -1.498960    | -0.865425 | 0.060310  | -1.493299        | -0.862157 | 0.059678  |
| C  | 0.000000     | 0.000000  | 1.660945  | 0.000000         | 0.000000  | 1.668050  |
| C  | -0.661385    | -1.607260 | -1.651348 | -0.653419        | -1.615858 | -1.647484 |
| C  | -0.914610    | -2.598060 | 0.985908  | -0.917725        | -2.601890 | 0.987677  |
| C  | -1.792681    | 2.091105  | 0.985908  | -1.794440        | 2.095718  | 0.987677  |
| C  | -1.061235    | 1.376406  | -1.651348 | -1.072664        | 1.373806  | -1.647484 |
| C  | 2.707291     | 0.506955  | 0.985908  | 2.712165         | 0.506172  | 0.987677  |
| C  | 1.722621     | 0.230854  | -1.651348 | 1.726083         | 0.242051  | -1.647484 |
| O  | 0.000000     | 0.000000  | 2.844327  | 0.000000         | 0.000000  | 2.848905  |
| O  | -0.405912    | -2.088635 | -2.683950 | -0.402100        | -2.098659 | -2.679998 |
| O  | -0.750259    | -3.612030 | 1.534781  | -0.758806        | -3.616414 | 1.535366  |
| O  | -2.752980    | 2.455759  | 1.534781  | -2.752503        | 2.465352  | 1.535366  |
| O  | -1.605855    | 1.395848  | -2.683950 | -1.616442        | 1.397559  | -2.679998 |
| O  | 3.503240     | 1.156271  | 1.534781  | 3.511309         | 1.151062  | 1.535366  |
| O  | 2.011767     | 0.692787  | -2.683950 | 2.018542         | 0.701100  | -2.679998 |
| C  | 0.225006     | 3.986917  | 0.949599  | 0.232121         | 3.990765  | 0.945854  |
| C  | 1.529035     | 3.436978  | 0.997016  | 1.536877         | 3.441537  | 0.996387  |
| C  | -0.173540    | 4.064121  | -0.421752 | -0.165033        | 4.064422  | -0.426313 |
| H  | -0.354568    | 4.319002  | 1.802177  | -0.347327        | 4.326793  | 1.797035  |
| C  | 1.945392     | 3.171518  | -0.336476 | 1.953981         | 3.171481  | -0.335769 |
| H  | 2.104908     | 3.242088  | 1.893074  | 2.112328         | 3.252690  | 1.893919  |
| C  | 0.895820     | 3.556077  | -1.215700 | 0.904643         | 3.553223  | -1.217491 |
| H  | -1.105292    | 4.472679  | -0.793383 | -1.095725        | 4.473242  | -0.800333 |
| H  | 2.902084     | 2.763421  | -0.634676 | 2.911534         | 2.764086  | -0.632318 |
| H  | 0.920044     | 3.497362  | -2.296779 | 0.930567         | 3.493174  | -2.298397 |
| C  | 3.340268     | -2.188319 | 0.949599  | 3.340044         | -2.196405 | 0.945854  |
| C  | 2.211993     | -3.042672 | 0.997016  | 2.212021         | -3.051743 | 0.996387  |
| C  | 3.606402     | -1.881770 | -0.421752 | 3.602409         | -1.889289 | -0.426313 |
| H  | 3.917650     | -1.852436 | 1.802177  | 3.920777         | -1.862603 | 1.797035  |
| C  | 1.773919     | -3.270518 | -0.336476 | 1.769593         | -3.277937 | -0.335769 |
| H  | 1.755277     | -3.443948 | 1.893074  | 1.760748         | -3.455675 | 1.893919  |
| C  | 2.631744     | -2.553841 | -1.215700 | 2.624859         | -2.560055 | -1.217491 |
| H  | 4.426100     | -1.279129 | -0.793383 | 4.421803         | -1.287695 | -0.800333 |
| H  | 0.942151     | -3.894989 | -0.634676 | 0.938002         | -3.903506 | -0.632318 |
| H  | 2.568783     | -2.545463 | -2.296779 | 2.559894         | -2.552481 | -2.298397 |
| C  | -3.565274    | -1.798598 | 0.949599  | -3.572165        | -1.794360 | 0.945854  |
| C  | -3.741028    | -0.394306 | 0.997016  | -3.748897        | -0.389795 | 0.996387  |
| C  | -3.432862    | -2.182351 | -0.421752 | -3.437376        | -2.175133 | -0.426313 |
| H  | -3.563081    | -2.466566 | 1.802177  | -3.573449        | -2.464191 | 1.797035  |
| C  | -3.719311    | 0.099000  | -0.336476 | -3.723573        | 0.106456  | -0.335769 |
| H  | -3.860185    | 0.201859  | 1.893074  | -3.873076        | 0.202985  | 1.893919  |
| C  | -3.527563    | -1.002236 | -1.215700 | -3.529503        | -0.993167 | -1.217491 |
| H  | -3.320808    | -3.193551 | -0.793383 | -3.326078        | -3.185546 | -0.800333 |
| H  | -3.844235    | 1.131568  | -0.634676 | -3.849536        | 1.139420  | -0.632318 |
| H  | -3.488827    | -0.951900 | -2.296779 | -3.490461        | -0.940693 | -2.298397 |

Table S22 Coordinates of  $\text{Cp}_3\text{Nb}_3(\text{CO})_7$  7-3  $C_3$

|    | BP86/SDD  |           |           | BP86/LANL2DZ |           |           |
|----|-----------|-----------|-----------|--------------|-----------|-----------|
| Nb | 0.000000  | 1.748223  | 0.061060  | 0.000000     | 1.742749  | 1.742749  |
| Nb | 1.514006  | -0.874112 | 0.061060  | 1.509265     | -0.871374 | -0.871374 |
| Nb | -1.514006 | -0.874112 | 0.061060  | -1.509265    | -0.871374 | -0.871374 |
| C  | 0.000000  | 0.000000  | 1.632195  | 0.000000     | 0.000000  | 0.000000  |
| C  | -0.651586 | -1.602425 | -1.654757 | -0.645583    | -1.609344 | -1.609344 |
| C  | -0.898209 | -2.591844 | 1.004333  | -0.900003    | -2.594572 | -2.594572 |
| C  | -1.795498 | 2.073793  | 1.004333  | -1.796964    | 2.076712  | 2.076712  |
| C  | -1.061948 | 1.365503  | -1.654757 | -1.070942    | 1.363763  | 1.363763  |
| C  | 2.693707  | 0.518050  | 1.004333  | 2.696967     | 0.517860  | 0.517860  |
| C  | 1.713534  | 0.236922  | -1.654757 | 1.716524     | 0.245581  | 0.245581  |
| O  | 0.000000  | 0.000000  | 2.841039  | 0.000000     | 0.000000  | 0.000000  |
| O  | -0.398474 | -2.096433 | -2.704711 | -0.395344    | -2.103596 | -2.103596 |
| O  | -0.727236 | -3.612483 | 1.581030  | -0.733329    | -3.616106 | -3.616106 |
| O  | -2.764884 | 2.436047  | 1.581030  | -2.764975    | 2.443134  | 2.443134  |
| O  | -1.616327 | 1.393305  | -2.704711 | -1.624096    | 1.394176  | 1.394176  |
| O  | 3.492120  | 1.176437  | 1.581030  | 3.498304     | 1.172972  | 1.172972  |
| O  | 2.014801  | 0.703128  | -2.704711 | 2.019440     | 0.709420  | 0.709420  |
| C  | 0.205693  | 4.036847  | 0.946202  | 0.211979     | 4.041974  | 4.041974  |
| C  | 1.524099  | 3.487780  | 1.002417  | 1.532058     | 3.495423  | 3.495423  |
| C  | -0.189993 | 4.109208  | -0.438832 | -0.184312    | 4.110734  | 4.110734  |
| H  | -0.388103 | 4.366702  | 1.802526  | -0.381101    | 4.374225  | 4.374225  |
| C  | 1.951421  | 3.217343  | -0.340681 | 1.958681     | 3.221223  | 3.221223  |
| H  | 2.101237  | 3.291834  | 1.909440  | 2.109554     | 3.304257  | 3.304257  |
| C  | 0.894054  | 3.598463  | -1.233471 | 0.899809     | 3.598351  | 3.598351  |
| H  | -1.134637 | 4.507134  | -0.818423 | -1.129171    | 4.507202  | 4.507202  |
| H  | 2.918829  | 2.805904  | -0.635503 | 2.926417     | 2.810362  | 2.810362  |
| H  | 0.920079  | 3.529891  | -2.323803 | 0.925834     | 3.527638  | 3.527638  |
| C  | 3.393166  | -2.196559 | 0.946202  | 3.394463     | -2.204566 | -2.204566 |
| C  | 2.258457  | -3.063799 | 1.002417  | 2.261096     | -3.074512 | -3.074512 |
| C  | 3.653675  | -1.890065 | -0.438832 | 3.652156     | -1.895748 | -1.895748 |
| H  | 3.975726  | -1.847244 | 1.802526  | 3.978741     | -1.857070 | -1.857070 |
| C  | 1.810590  | -3.298651 | -0.340681 | 1.810321     | -3.306879 | -3.306879 |
| H  | 1.800194  | -3.465642 | 1.909440  | 1.806794     | -3.479056 | -3.479056 |
| C  | 2.669333  | -2.573505 | -1.233471 | 2.666359     | -2.578433 | -2.578433 |
| H  | 4.470611  | -1.270942 | -0.818423 | 4.467937     | -1.275711 | -1.275711 |
| H  | 0.970570  | -3.930732 | -0.635503 | 0.970636     | -3.939533 | -3.939533 |
| H  | 2.596936  | -2.561757 | -2.323803 | 2.592107     | -2.565615 | -2.565615 |
| C  | -3.598859 | -1.840288 | 0.946202  | -3.606442    | -1.837408 | -1.837408 |
| C  | -3.782556 | -0.423981 | 1.002417  | -3.793154    | -0.420911 | -0.420911 |
| C  | -3.463682 | -2.219143 | -0.438832 | -3.467843    | -2.214986 | -2.214986 |
| H  | -3.587624 | -2.519458 | 1.802526  | -3.597640    | -2.517156 | -2.517156 |
| C  | -3.762011 | 0.081309  | -0.340681 | -3.769002    | 0.085656  | 0.085656  |
| H  | -3.901430 | 0.173807  | 1.909440  | -3.916348    | 0.174799  | 0.174799  |
| C  | -3.563387 | -1.024958 | -1.233471 | -3.566168    | -1.019918 | -1.019918 |
| H  | -3.335974 | -3.236192 | -0.818423 | -3.338766    | -3.231492 | -3.231492 |
| H  | -3.889399 | 1.124828  | -0.635503 | -3.897054    | 1.129171  | 1.129171  |
| H  | -3.517015 | -0.968134 | -2.323803 | -3.517941    | -0.962023 | -0.962023 |

Table S23 Coordinates of  $\text{Cp}_3\text{Nb}_3(\text{CO})_6$  6-1  $C_1$

|    | MPW1PW91/SDD |           |           | MPW1PW91/LANL2DZ |           |           |
|----|--------------|-----------|-----------|------------------|-----------|-----------|
| Nb | -1.626339    | -0.761795 | -0.041026 | -1.631497        | -0.750751 | -0.043448 |
| Nb | -0.007774    | 1.576518  | -0.013410 | -0.003449        | 1.567461  | -0.012088 |
| Nb | 1.593033     | -0.721613 | -0.003515 | 1.593168         | -0.719472 | -0.000826 |
| C  | 0.591062     | 0.976331  | -1.847308 | 0.595197         | 0.971417  | -1.851280 |
| O  | 0.865678     | 0.840364  | -2.983379 | 0.867686         | 0.845127  | -2.987644 |
| C  | 1.703549     | 0.828064  | 1.411206  | 1.698690         | 0.818558  | 1.432783  |
| O  | 2.184333     | 1.388031  | 2.333552  | 2.168898         | 1.372251  | 2.361628  |
| C  | 1.253911     | -1.684289 | 1.816738  | 1.253095         | -1.706311 | 1.809393  |
| O  | 1.105428     | -2.194547 | 2.841825  | 1.099304         | -2.229289 | 2.826680  |
| C  | 0.026005     | -2.170178 | -0.573385 | 0.020952         | -2.153464 | -0.598288 |
| O  | 0.060612     | -3.266666 | -1.041586 | 0.052486         | -3.237662 | -1.088742 |
| C  | -1.993713    | 0.815813  | -1.329510 | -2.016640        | 0.831621  | -1.322931 |
| O  | -2.581881    | 1.450490  | -2.130772 | -2.601268        | 1.471556  | -2.120021 |
| C  | -1.393689    | 0.324884  | 1.666661  | -1.394001        | 0.328967  | 1.671982  |
| O  | -1.457469    | 0.788438  | 2.747116  | -1.458558        | 0.782787  | 2.755172  |
| C  | -3.753594    | -1.479211 | -0.933098 | -3.767762        | -1.484753 | -0.924007 |
| C  | -2.932430    | -2.632284 | -0.885332 | -2.938704        | -2.632893 | -0.887920 |
| C  | -3.959013    | -1.027124 | 0.404521  | -3.965741        | -1.039819 | 0.417185  |
| H  | -4.154993    | -1.016220 | -1.826482 | -4.179861        | -1.021667 | -1.812530 |
| C  | -2.632855    | -2.905424 | 0.484134  | -2.626815        | -2.910213 | 0.477875  |
| H  | -2.574390    | -3.203212 | -1.733103 | -2.586282        | -3.198615 | -1.741439 |
| C  | -3.273226    | -1.921354 | 1.279385  | -3.267508        | -1.933569 | 1.282740  |
| H  | -4.557315    | -0.175096 | 0.705166  | -4.567905        | -0.193516 | 0.726394  |
| H  | -2.026070    | -3.726328 | 0.845805  | -2.014463        | -3.730239 | 0.832232  |
| H  | -3.253615    | -1.861098 | 2.360911  | -3.241643        | -1.879661 | 2.364469  |
| C  | 0.656252     | 3.774466  | -0.778707 | 0.675545         | 3.773957  | -0.772353 |
| C  | -0.757763    | 3.671202  | -0.925614 | -0.737779        | 3.673725  | -0.932054 |
| C  | 0.959425     | 3.724217  | 0.608176  | 0.965847         | 3.724167  | 0.617102  |
| H  | 1.369737     | 3.876635  | -1.587696 | 1.397056         | 3.874128  | -1.574515 |
| C  | -1.322065    | 3.572037  | 0.381087  | -1.314420        | 3.578586  | 0.369836  |
| H  | -1.306138    | 3.679175  | -1.859001 | -1.277597        | 3.686440  | -1.870371 |
| C  | -0.262120    | 3.599502  | 1.326992  | -0.263013        | 3.603730  | 1.325150  |
| H  | 1.947400     | 3.753510  | 1.050752  | 1.950059         | 3.753166  | 1.068083  |
| H  | -2.377092    | 3.476322  | 0.609872  | -2.372111        | 3.492521  | 0.589637  |
| H  | -0.359841    | 3.513865  | 2.402522  | -0.370995        | 3.524507  | 2.400187  |
| C  | 3.065785     | -2.544817 | -0.565816 | 3.061691         | -2.545893 | -0.603725 |
| C  | 2.871602     | -1.763046 | -1.736500 | 2.886058         | -1.726586 | -1.751188 |
| C  | 3.767698     | -1.741455 | 0.384766  | 3.763962         | -1.779049 | 0.377223  |
| H  | 2.732268     | -3.565462 | -0.425521 | 2.717163         | -3.566910 | -0.497293 |
| C  | 3.453449     | -0.480732 | -1.509134 | 3.479007         | -0.456926 | -1.479133 |
| H  | 2.365105     | -2.083680 | -2.638633 | 2.386891         | -2.013756 | -2.668494 |
| C  | 4.001244     | -0.468535 | -0.196473 | 4.016006         | -0.491182 | -0.162418 |
| H  | 4.076509     | -2.047803 | 1.377233  | 4.062325         | -2.119832 | 1.361676  |
| H  | 3.463289     | 0.341571  | -2.213836 | 3.509567         | 0.384999  | -2.159593 |
| H  | 4.508706     | 0.363055  | 0.277281  | 4.530326         | 0.319087  | 0.339951  |

Table S24 Coordinates of  $\text{Cp}_3\text{Nb}_3(\text{CO})_6$  6-1  $C_1$

|    | BP86/SDD  |           |           | BP86/LANL2DZ |           |           |
|----|-----------|-----------|-----------|--------------|-----------|-----------|
| Nb | -1.633344 | -0.797644 | -0.036576 | -1.636452    | -0.790810 | -0.038008 |
| Nb | -0.036603 | 1.600027  | -0.018157 | -0.034957    | 1.590313  | -0.017572 |
| Nb | 1.613022  | -0.715548 | -0.022259 | 1.615222     | -0.707773 | -0.021274 |
| C  | 0.600226  | 0.932801  | -1.832305 | 0.597789     | 0.933060  | -1.839937 |
| O  | 0.900360  | 0.762561  | -2.978945 | 0.894706     | 0.773232  | -2.987425 |
| C  | 1.693263  | 0.933832  | 1.340776  | 1.689131     | 0.927591  | 1.359106  |
| O  | 2.257956  | 1.500294  | 2.239637  | 2.238928     | 1.489730  | 2.267193  |
| C  | 1.253688  | -1.578130 | 1.839886  | 1.256209     | -1.589280 | 1.833298  |
| O  | 1.104624  | -2.042984 | 2.909256  | 1.103391     | -2.061722 | 2.898321  |
| C  | 0.063667  | -2.179114 | -0.590324 | 0.060780     | -2.160496 | -0.617093 |
| O  | 0.096334  | -3.291484 | -1.069276 | 0.095697     | -3.260442 | -1.118478 |
| C  | -2.032182 | 0.769660  | -1.338340 | -2.056708    | 0.779257  | -1.331403 |
| O  | -2.638792 | 1.404813  | -2.153791 | -2.661534    | 1.418884  | -2.142206 |
| C  | -1.390334 | 0.338577  | 1.651251  | -1.388912    | 0.337779  | 1.657877  |
| O  | -1.462193 | 0.825158  | 2.743893  | -1.460892    | 0.813991  | 2.753622  |
| C  | -3.785414 | -1.570044 | -0.897435 | -3.793009    | -1.587409 | -0.889237 |
| C  | -2.934662 | -2.718579 | -0.858712 | -2.932971    | -2.729558 | -0.856260 |
| C  | -3.976523 | -1.111932 | 0.453069  | -3.980441    | -1.131832 | 0.462796  |
| H  | -4.214224 | -1.113818 | -1.793657 | -4.230822    | -1.134961 | -1.782997 |
| C  | -2.597914 | -2.978884 | 0.516632  | -2.586272    | -2.988069 | 0.516922  |
| H  | -2.577155 | -3.290499 | -1.718711 | -2.577037    | -3.297901 | -1.719082 |
| C  | -3.245897 | -1.991243 | 1.327013  | -3.237730    | -2.005880 | 1.331959  |
| H  | -4.584854 | -0.257391 | 0.762661  | -4.593298    | -0.282072 | 0.776516  |
| H  | -1.960992 | -3.791987 | 0.873562  | -1.942364    | -3.797025 | 0.870725  |
| H  | -3.203295 | -1.920767 | 2.417150  | -3.190579    | -1.937180 | 2.421960  |
| C  | 0.555220  | 3.820417  | -0.865974 | 0.579501     | 3.822381  | -0.847783 |
| C  | -0.872381 | 3.683009  | -0.958283 | -0.846154    | 3.684650  | -0.975581 |
| C  | 0.913347  | 3.805644  | 0.521469  | 0.903207     | 3.807182  | 0.547868  |
| H  | 1.242247  | 3.917678  | -1.711021 | 1.287544     | 3.919561  | -1.675302 |
| C  | -1.392165 | 3.596445  | 0.381155  | -1.398938    | 3.599534  | 0.350761  |
| H  | -1.459149 | 3.654766  | -1.879444 | -1.410034    | 3.660241  | -1.910955 |
| C  | -0.288893 | 3.666843  | 1.294968  | -0.318263    | 3.668828  | 1.291396  |
| H  | 1.925260  | 3.864067  | 0.930144  | 1.904943     | 3.865428  | 0.980700  |
| H  | -2.445530 | 3.483045  | 0.652665  | -2.459025    | 3.491095  | 0.596196  |
| H  | -0.345178 | 3.600185  | 2.384634  | -0.401728    | 3.604411  | 2.379392  |
| C  | 3.135320  | -2.566890 | -0.478606 | 3.136702     | -2.567206 | -0.507220 |
| C  | 2.971051  | -1.816080 | -1.689947 | 2.988486     | -1.786327 | -1.701455 |
| C  | 3.806387  | -1.722444 | 0.476813  | 3.807260     | -1.751036 | 0.473555  |
| H  | 2.801202  | -3.594352 | -0.314881 | 2.793386     | -3.595477 | -0.370406 |
| C  | 3.541694  | -0.511149 | -1.482040 | 3.567655     | -0.490466 | -1.457429 |
| H  | 2.493832  | -2.173364 | -2.606091 | 2.517661     | -2.117297 | -2.630530 |
| C  | 4.050259  | -0.454216 | -0.140575 | 4.065984     | -0.469879 | -0.110933 |
| H  | 4.086016  | -1.998431 | 1.497205  | 4.076840     | -2.054061 | 1.488955  |
| H  | 3.566076  | 0.298153  | -2.216291 | 3.609145     | 0.335092  | -2.172428 |
| H  | 4.536854  | 0.404421  | 0.329623  | 4.556815     | 0.372858  | 0.382799  |

TableS25 Coordinates of  $\text{Cp}_3\text{Nb}_3(\text{CO})_6$  6-2  $C_1$

|    | MPW1PW91/SDD |           |           | MPW1PW91/LANL2DZ |           |           |
|----|--------------|-----------|-----------|------------------|-----------|-----------|
| C  | 1.747212     | 0.192466  | -1.891929 | 1.762459         | 0.189377  | -1.906885 |
| O  | 1.758283     | 0.706675  | -2.950909 | 1.781400         | 0.715350  | -2.957660 |
| C  | 1.154763     | 0.401543  | 1.846356  | 1.134835         | 0.385697  | 1.862752  |
| O  | 1.539805     | 0.180000  | 2.940117  | 1.507115         | 0.163231  | 2.958251  |
| C  | -1.710332    | -0.269706 | 2.015375  | -1.723238        | -0.327834 | 2.028705  |
| O  | -1.556864    | -0.201689 | 3.160518  | -1.560280        | -0.293286 | 3.172789  |
| C  | -1.669687    | 0.419087  | -1.839801 | -1.664020        | 0.464908  | -1.827400 |
| O  | -1.449706    | 0.881412  | -2.883339 | -1.436099        | 0.942812  | -2.861913 |
| C  | -0.136363    | -1.086832 | -0.077725 | -0.148179        | -1.095667 | -0.080786 |
| O  | 0.422914     | -2.248453 | -0.071118 | 0.392505         | -2.259877 | -0.074958 |
| C  | -2.978793    | 1.419106  | 0.310914  | -2.952566        | 1.438604  | 0.365223  |
| O  | -3.481110    | 2.450684  | 0.496916  | -3.444221        | 2.467945  | 0.585785  |
| C  | 4.437224     | -0.524094 | -0.602162 | 4.431848         | -0.511838 | -0.587804 |
| C  | 4.134585     | -0.261551 | 0.758467  | 4.098332         | -0.239001 | 0.763738  |
| C  | 4.252812     | -1.914002 | -0.840676 | 4.282361         | -1.908494 | -0.812092 |
| H  | 4.748547     | 0.205178  | -1.340706 | 4.743227         | 0.214553  | -1.329322 |
| C  | 3.749869     | -1.494837 | 1.366109  | 3.727959         | -1.474186 | 1.378245  |
| H  | 4.190245     | 0.697255  | 1.256915  | 4.133139         | 0.725232  | 1.253652  |
| C  | 3.829647     | -2.516910 | 0.375879  | 3.849626         | -2.506303 | 0.402755  |
| H  | 4.395418     | -2.415256 | -1.791525 | 4.453307         | -2.417560 | -1.754219 |
| H  | 3.454438     | -1.619460 | 2.401129  | 3.422411         | -1.595077 | 2.410781  |
| H  | 3.605088     | -3.566902 | 0.525046  | 3.647797         | -3.559518 | 0.561622  |
| C  | -0.330817    | 3.267592  | 0.891633  | -0.274477        | 3.258305  | 0.928712  |
| C  | 1.063751     | 3.197066  | 1.137510  | 1.128164         | 3.174504  | 1.129033  |
| C  | -0.528979    | 3.260153  | -0.526556 | -0.515797        | 3.270104  | -0.482697 |
| H  | -1.106123    | 3.336752  | 1.644487  | -1.024569        | 3.332102  | 1.706338  |
| C  | 1.730816     | 3.115201  | -0.118312 | 1.753781         | 3.101764  | -0.147842 |
| H  | 1.536874     | 3.194859  | 2.111909  | 1.632303         | 3.160112  | 2.087693  |
| C  | 0.738345     | 3.169813  | -1.143974 | 0.729927         | 3.176091  | -1.141056 |
| H  | -1.479461    | 3.334943  | -1.037530 | -1.480665        | 3.359694  | -0.963328 |
| H  | 2.802009     | 3.059802  | -0.269929 | 2.819309         | 3.039677  | -0.333761 |
| H  | 0.925100     | 3.117334  | -2.209833 | 0.882491         | 3.136317  | -2.212851 |
| Nb | 0.451032     | 1.085562  | 0.101387  | 0.464395         | 1.067054  | 0.100962  |
| Nb | 2.049370     | -0.985843 | -0.242987 | 2.040442         | -1.012748 | -0.263259 |
| C  | -4.364805    | -1.192762 | -0.863948 | -4.374575        | -1.133738 | -0.900685 |
| C  | -3.398630    | -2.058126 | -1.460362 | -3.414806        | -2.004761 | -1.501550 |
| C  | -4.356961    | -1.436774 | 0.543341  | -4.387804        | -1.403115 | 0.501455  |
| H  | -5.013819    | -0.504166 | -1.390756 | -5.006759        | -0.425960 | -1.422373 |
| C  | -2.803626    | -2.835385 | -0.431746 | -2.846098        | -2.811418 | -0.480456 |
| H  | -3.170900    | -2.127255 | -2.517283 | -3.177434        | -2.060468 | -2.557043 |
| C  | -3.388362    | -2.454019 | 0.803367  | -3.439515        | -2.441644 | 0.754241  |
| H  | -5.000479    | -0.968088 | 1.277671  | -5.033643        | -0.938209 | 1.236110  |
| H  | -2.015334    | -3.567115 | -0.561266 | -2.070018        | -3.555247 | -0.613838 |
| H  | -3.151107    | -2.876854 | 1.772124  | -3.222682        | -2.886911 | 1.717699  |
| Nb | -2.247159    | -0.485871 | -0.027144 | -2.250956        | -0.469581 | -0.028902 |

Table S26 Coordinates of  $\text{Cp}_3\text{Nb}_3(\text{CO})_6$  6-2  $C_1$

|    | BP86/SDD  |           |           | BP86/LANL2DZ |           |           |
|----|-----------|-----------|-----------|--------------|-----------|-----------|
| C  | 1.708962  | 0.124528  | -1.890078 | 1.705793     | 0.100705  | -1.903363 |
| O  | 1.726887  | 0.610155  | -2.987492 | 1.729042     | 0.581730  | -3.000874 |
| C  | 1.224334  | 0.374092  | 1.828675  | 1.218445     | 0.357771  | 1.844720  |
| O  | 1.635855  | 0.179636  | 2.941063  | 1.624833     | 0.165626  | 2.957228  |
| C  | -1.703684 | 0.058085  | 1.926856  | -1.715759    | 0.087792  | 1.923056  |
| O  | -1.625373 | 0.309411  | 3.078597  | -1.644030    | 0.356834  | 3.070664  |
| C  | -1.706050 | 0.366294  | -1.845233 | -1.703094    | 0.377186  | -1.844279 |
| O  | -1.528402 | 0.809669  | -2.925262 | -1.522057    | 0.821817  | -2.922379 |
| C  | -0.141257 | -1.113454 | -0.086497 | -0.150965    | -1.125448 | -0.083131 |
| O  | 0.432177  | -2.266680 | -0.120018 | 0.407531     | -2.277773 | -0.121073 |
| C  | -3.099491 | 1.381832  | 0.157894  | -3.098071    | 1.397184  | 0.147912  |
| O  | -3.631557 | 2.429468  | 0.260689  | -3.623594    | 2.447783  | 0.246149  |
| C  | 4.471951  | -0.513838 | -0.606108 | 4.469395     | -0.493200 | -0.593254 |
| C  | 4.254383  | -0.349271 | 0.800734  | 4.247830     | -0.345207 | 0.815086  |
| C  | 4.228716  | -1.892002 | -0.939062 | 4.246941     | -1.872607 | -0.938992 |
| H  | 4.772574  | 0.267398  | -1.309468 | 4.761978     | 0.298158  | -1.288633 |
| C  | 3.873942  | -1.628187 | 1.345463  | 3.886193     | -1.635430 | 1.347286  |
| H  | 4.360452  | 0.577209  | 1.370128  | 4.344665     | 0.576371  | 1.393811  |
| C  | 3.855345  | -2.575212 | 0.267998  | 3.883445     | -2.571930 | 0.261282  |
| H  | 4.304887  | -2.330903 | -1.938001 | 4.331201     | -2.301417 | -1.941601 |
| H  | 3.632440  | -1.827291 | 2.392990  | 3.650840     | -1.850074 | 2.393055  |
| H  | 3.590006  | -3.633706 | 0.350038  | 3.631782     | -3.634568 | 0.333142  |
| C  | -0.324397 | 3.362015  | 0.824300  | -0.291453    | 3.371962  | 0.819458  |
| C  | 1.077027  | 3.233218  | 1.084489  | 1.109760     | 3.223962  | 1.073257  |
| C  | -0.520099 | 3.311239  | -0.601856 | -0.494528    | 3.319894  | -0.605169 |
| H  | -1.107881 | 3.471661  | 1.579126  | -1.070005    | 3.494473  | 1.577588  |
| C  | 1.752442  | 3.085068  | -0.179791 | 1.776978     | 3.064738  | -0.194444 |
| H  | 1.549048  | 3.247418  | 2.070342  | 1.586992     | 3.235898  | 2.056609  |
| C  | 0.755900  | 3.141658  | -1.219125 | 0.775853     | 3.131517  | -1.228809 |
| H  | -1.477747 | 3.391249  | -1.120854 | -1.453944    | 3.409807  | -1.119442 |
| H  | 2.831106  | 2.995562  | -0.328842 | 2.853947     | 2.966080  | -0.348751 |
| H  | 0.944145  | 3.040410  | -2.291150 | 0.956913     | 3.028353  | -2.301746 |
| Nb | 0.404248  | 1.100760  | 0.111789  | 0.408251     | 1.085096  | 0.116647  |
| Nb | 2.090447  | -0.902524 | -0.167695 | 2.086897     | -0.908207 | -0.167622 |
| C  | -4.395968 | -1.405430 | -0.745738 | -4.412023    | -1.397316 | -0.739910 |
| C  | -3.396359 | -2.261179 | -1.327419 | -3.418197    | -2.258761 | -1.323712 |
| C  | -4.326488 | -1.556199 | 0.686576  | -4.338539    | -1.545923 | 0.692456  |
| H  | -5.102424 | -0.777602 | -1.294984 | -5.118211    | -0.767978 | -1.287643 |
| C  | -2.714732 | -2.936884 | -0.262826 | -2.736061    | -2.935971 | -0.260000 |
| H  | -3.194713 | -2.382462 | -2.395183 | -3.221887    | -2.383896 | -2.391861 |
| C  | -3.283379 | -2.504888 | 0.979729  | -3.298516    | -2.498984 | 0.984123  |
| H  | -4.970497 | -1.062532 | 1.418936  | -4.978650    | -1.048493 | 1.425607  |
| H  | -1.881093 | -3.634938 | -0.376265 | -1.905663    | -3.637399 | -0.374844 |
| H  | -2.983303 | -2.846441 | 1.973924  | -2.997844    | -2.841356 | 1.977676  |
| Nb | -2.272507 | -0.522071 | -0.023978 | -2.278721    | -0.514052 | -0.024686 |

TableS27 Harmonic vibrational frequencies( $\text{cm}^{-1}$ ) and IR intensities (KM/Mole) of  $\text{Cp}_3\text{Nb}_3(\text{CO})_9$  9-1

| MPW1PW91/SDD                                                                                                                                                                                                                                                                                                                                                                                                                                                                                                                                                                                                                                                                                                                                                                                                                                                                                                                                                                                                                                                                                                                                                                                                                                                                                                          | MPW1PW91/LANL2DZ                                                                                                                                                                                                                                                                                                                                                                                                                                                                                                                                                                                                                                                                                                                                                                                                                                                                                                                                                                                                                                                                                                                                                                                                                                                                                                      | BP86/SDD                                                                                                                                                                                                                                                                                                                                                                                                                                                                                                                                                                                                                                                                                                                                                                                                                                                                                                                                                                                                                                                                                                                                                                                                                                                                                        | BP86/LANL2DZ                                                                                                                                                                                                                                                                                                                                                                                                                                                                                                                                                                                                                                                                                                                                                                                                                                                                                                                                                                                                                                                                                                                                                                                                                                                                                     |
|-----------------------------------------------------------------------------------------------------------------------------------------------------------------------------------------------------------------------------------------------------------------------------------------------------------------------------------------------------------------------------------------------------------------------------------------------------------------------------------------------------------------------------------------------------------------------------------------------------------------------------------------------------------------------------------------------------------------------------------------------------------------------------------------------------------------------------------------------------------------------------------------------------------------------------------------------------------------------------------------------------------------------------------------------------------------------------------------------------------------------------------------------------------------------------------------------------------------------------------------------------------------------------------------------------------------------|-----------------------------------------------------------------------------------------------------------------------------------------------------------------------------------------------------------------------------------------------------------------------------------------------------------------------------------------------------------------------------------------------------------------------------------------------------------------------------------------------------------------------------------------------------------------------------------------------------------------------------------------------------------------------------------------------------------------------------------------------------------------------------------------------------------------------------------------------------------------------------------------------------------------------------------------------------------------------------------------------------------------------------------------------------------------------------------------------------------------------------------------------------------------------------------------------------------------------------------------------------------------------------------------------------------------------|-------------------------------------------------------------------------------------------------------------------------------------------------------------------------------------------------------------------------------------------------------------------------------------------------------------------------------------------------------------------------------------------------------------------------------------------------------------------------------------------------------------------------------------------------------------------------------------------------------------------------------------------------------------------------------------------------------------------------------------------------------------------------------------------------------------------------------------------------------------------------------------------------------------------------------------------------------------------------------------------------------------------------------------------------------------------------------------------------------------------------------------------------------------------------------------------------------------------------------------------------------------------------------------------------|--------------------------------------------------------------------------------------------------------------------------------------------------------------------------------------------------------------------------------------------------------------------------------------------------------------------------------------------------------------------------------------------------------------------------------------------------------------------------------------------------------------------------------------------------------------------------------------------------------------------------------------------------------------------------------------------------------------------------------------------------------------------------------------------------------------------------------------------------------------------------------------------------------------------------------------------------------------------------------------------------------------------------------------------------------------------------------------------------------------------------------------------------------------------------------------------------------------------------------------------------------------------------------------------------|
| 36(0), 38(0), 38(0), 55(0), 55(0), 66(0), 66(0), 72(0), 85(1), 85(1), 87(1), 88(1), 88(1), 94(0), 101(1), 101(1), 106(0), 111(0), 116(1), 116(1), 125(1), 125(1), 127(0), 139(2), 139(2), 145(0), 157(0), 166(3), 166(3), 166(0), 298(42), 298(42), 306(1), 338(2), 338(2), 339(1), 341(4), 341(4), 343(11), 360(0), 360(0), 362(2), 407(6), 407(6), 413(46), 428(2), 430(29), 430(29), 444(57), 444(57), 446(2), 459(1), 459(1), 468(3), 468(3), 468(7), 471(9), 517(9), 533(152), 533(152), 544(12), 544(12), 544(15), 549(8), 550(27), 550(27), 612(0), 613(1), 613(1), 618(0), 618(0), 618(0), 836(136), 836(136), 836(13), 846(0), 846(0), 846(0), 849(0), 849(0), 849(0), 854(39), 854(39), 855(0), 858(5), 858(5), 859(26), 917(1), 917(0), 917(0), 941(0), 941(0), 942(0), 1031(3), 1031(3), 1031(11), 1033(5), 1033(5), 1033(3), 1081(2), 1081(2), 1081(0), 1083(0), 1083(0), 1083(0), 1150(0), 1150(0), 1150(0), 1276(0), 1276(0), 1276(0), 1425(1), 1425(1), 1425(0), 1431(0), 1431(0), 1431(7), 1472(0), 1472(0), 1472(5), 1475(0), 1475(6), 1475(6), 1931(45), 1931(45), 1978(1349), 2010(1107), 2010(1107), 2026(511), 2050(467), 2050(467), 2116(1157), 3281(1), 3281(0), 3281(0), 3286(0), 3286(0), 3286(0), 3295(0), 3295(0), 3296(2), 3298(0), 3298(0), 3298(0), 3310(0), 3310(0), 3310(0), 3310(0) | 35(0), 36(0), 36(0), 53(0), 53(0), 66(0), 66(0), 71(0), 84(1), 84(1), 86(1), 87(1), 87(1), 92(0), 99(1), 99(1), 106(0), 109(0), 115(1), 115(1), 123(2), 123(2), 126(0), 137(2), 137(2), 144(0), 155(1), 163(3), 163(3), 165(0), 291(44), 291(44), 300(1), 332(1), 332(1), 333(1), 335(4), 335(4), 337(11), 356(0), 356(0), 358(2), 402(6), 402(6), 410(48), 422(3), 426(23), 426(23), 441(61), 441(61), 443(2), 455(2), 455(2), 463(2), 463(2), 463(5), 466(9), 516(8), 530(154), 530(154), 542(14), 542(22), 542(22), 547(11), 549(22), 549(22), 607(0), 607(1), 607(1), 613(0), 613(0), 613(0), 829(121), 829(121), 829(9), 841(44), 841(44), 843(1), 844(6), 844(6), 844(2), 845(10), 845(10), 846(29), 847(0), 847(3), 847(3), 904(1), 904(0), 904(0), 927(1), 927(1), 927(0), 1030(3), 1030(3), 1031(12), 1032(5), 1032(5), 1033(3), 1080(2), 1080(2), 1081(0), 1082(0), 1083(0), 1083(0), 1149(0), 1149(0), 1149(0), 1276(0), 1276(0), 1276(0), 1425(1), 1425(1), 1425(0), 1430(0), 1430(0), 1430(7), 1472(0), 1472(0), 1472(6), 1474(0), 1474(7), 1474(7), 1940(39), 1940(39), 1984(1314), 2014(1072), 2014(1072), 2031(542), 2053(466), 2053(466), 2118(1114), 3283(0), 3283(0), 3283(0), 3288(0), 3288(0), 3288(0), 3298(0), 3298(0), 3298(4), 3300(0), 3300(1), 3300(1), 3313(0), 3313(0), 3313(0), 3313(0) | 26(1), 26(1), 36(0), 50(0), 50(0), 60(0), 60(0), 63(0), 77(0), 77(0), 81(1), 82(1), 82(1), 88(0), 96(2), 96(2), 98(0), 103(0), 108(1), 108(1), 118(1), 118(1), 122(0), 131(2), 131(2), 134(0), 149(0), 157(0), 162(3), 162(3), 285(44), 285(44), 290(0), 314(0), 314(0), 315(5), 319(7), 319(7), 320(7), 339(1), 339(0), 339(0), 385(4), 385(4), 392(19), 406(0), 407(31), 407(31), 426(3), 426(44), 426(44), 444(7), 444(7), 449(5), 449(5), 450(10), 451(4), 493(6), 510(108), 510(108), 510(3), 517(15), 517(15), 519(16), 521(29), 521(29), 580(0), 581(1), 581(1), 586(0), 586(0), 586(0), 798(128), 798(128), 799(17), 810(39), 810(39), 812(1), 813(1), 813(1), 813(20), 814(0), 814(0), 814(0), 817(3), 817(4), 817(4), 869(0), 869(0), 869(1), 889(0), 889(0), 889(0), 990(5), 990(5), 990(6), 992(3), 992(3), 993(7), 1042(1), 1042(1), 1042(1), 1043(0), 1043(1), 1043(1), 1104(0), 1104(0), 1104(0), 1223(0), 1223(0), 1223(0), 1361(0), 1361(0), 1361(0), 1365(0), 1365(0), 1366(6), 1408(1), 1408(1), 1408(4), 1410(4), 1410(4), 1410(0), 1813(53), 1813(53), 1857(1134), 1894(752), 1894(752), 1905(280), 1925(566), 1925(566), 1986(976), 3173(1), 3173(0), 3173(0), 3178(0), 3178(0), 3178(0), 3187(0), 3187(0), 3187(1), 3189(0), 3189(1), 3189(1), 3201(0), 3201(0), 3201(0) | 23(1), 23(1), 34(0), 48(0), 48(0), 59(0), 59(0), 64(0), 77(0), 77(0), 80(1), 80(1), 80(1), 86(0), 93(1), 93(1), 97(0), 102(0), 107(1), 107(1), 116(1), 116(1), 121(0), 129(2), 129(2), 133(0), 147(0), 156(0), 159(3), 159(3), 278(45), 278(45), 285(0), 307(0), 307(0), 308(6), 313(7), 313(7), 313(7), 334(1), 335(0), 335(0), 381(4), 381(4), 389(20), 401(0), 402(27), 402(27), 424(46), 424(46), 424(3), 440(9), 440(9), 445(6), 445(6), 446(11), 447(4), 492(6), 507(111), 507(111), 508(3), 516(20), 516(20), 519(16), 522(25), 522(25), 574(0), 575(1), 575(1), 580(0), 580(0), 580(0), 791(97), 791(97), 792(13), 798(24), 798(24), 799(13), 799(55), 799(55), 801(15), 812(0), 812(0), 812(0), 814(0), 814(2), 814(2), 857(1), 857(0), 857(0), 874(1), 874(1), 875(0), 989(5), 989(5), 990(6), 992(3), 992(3), 992(9), 1041(1), 1041(1), 1041(1), 1043(0), 1043(1), 1043(1), 1103(0), 1103(0), 1103(0), 1222(0), 1223(0), 1223(0), 1360(1), 1360(1), 1361(0), 1365(0), 1365(0), 1365(6), 1408(2), 1408(2), 1408(5), 1410(4), 1410(4), 1410(1), 1822(46), 1822(46), 1864(1103), 1897(714), 1897(715), 1909(308), 1927(574), 1927(574), 1987(931), 3175(1), 3175(0), 3175(0), 3180(0), 3180(0), 3180(0), 3190(0), 3190(0), 3190(2), 3192(0), 3192(1), 3192(1), 3204(0), 3204(0), 3204(0) |

Table S28 Harmonic vibrational frequencies( $\text{cm}^{-1}$ ) and IR intensities (KM/Mole) of  $\text{Cp}_3\text{Nb}_3(\text{CO})_9$  9-2

| MPW1PW91/SDD                                                                                                                                                                                                                                                                                                                                                                                                                                                                                                                                                                                                                                                                                                                                                                                                                                                                                                                                                                                                                                                                                                                                                                                                                                                                                                         | MPW1PW91/LANL2DZ                                                                                                                                                                                                                                                                                                                                                                                                                                                                                                                                                                                                                                                                                                                                                                                                                                                                                                                                                                                                                                                                                                                                                                                                                                                                                                   | BP86/SDD                                                                                                                                                                                                                                                                                                                                                                                                                                                                                                                                                                                                                                                                                                                                                                                                                                                                                                                                                                                                                                                                                                                                                                                                                                                                                        | BP86/LANL2DZ                                                                                                                                                                                                                                                                                                                                                                                                                                                                                                                                                                                                                                                                                                                                                                                                                                                                                                                                                                                                                                                                                                                                                                                                                                                                                      |
|----------------------------------------------------------------------------------------------------------------------------------------------------------------------------------------------------------------------------------------------------------------------------------------------------------------------------------------------------------------------------------------------------------------------------------------------------------------------------------------------------------------------------------------------------------------------------------------------------------------------------------------------------------------------------------------------------------------------------------------------------------------------------------------------------------------------------------------------------------------------------------------------------------------------------------------------------------------------------------------------------------------------------------------------------------------------------------------------------------------------------------------------------------------------------------------------------------------------------------------------------------------------------------------------------------------------|--------------------------------------------------------------------------------------------------------------------------------------------------------------------------------------------------------------------------------------------------------------------------------------------------------------------------------------------------------------------------------------------------------------------------------------------------------------------------------------------------------------------------------------------------------------------------------------------------------------------------------------------------------------------------------------------------------------------------------------------------------------------------------------------------------------------------------------------------------------------------------------------------------------------------------------------------------------------------------------------------------------------------------------------------------------------------------------------------------------------------------------------------------------------------------------------------------------------------------------------------------------------------------------------------------------------|-------------------------------------------------------------------------------------------------------------------------------------------------------------------------------------------------------------------------------------------------------------------------------------------------------------------------------------------------------------------------------------------------------------------------------------------------------------------------------------------------------------------------------------------------------------------------------------------------------------------------------------------------------------------------------------------------------------------------------------------------------------------------------------------------------------------------------------------------------------------------------------------------------------------------------------------------------------------------------------------------------------------------------------------------------------------------------------------------------------------------------------------------------------------------------------------------------------------------------------------------------------------------------------------------|---------------------------------------------------------------------------------------------------------------------------------------------------------------------------------------------------------------------------------------------------------------------------------------------------------------------------------------------------------------------------------------------------------------------------------------------------------------------------------------------------------------------------------------------------------------------------------------------------------------------------------------------------------------------------------------------------------------------------------------------------------------------------------------------------------------------------------------------------------------------------------------------------------------------------------------------------------------------------------------------------------------------------------------------------------------------------------------------------------------------------------------------------------------------------------------------------------------------------------------------------------------------------------------------------|
| 32(0), 43(0), 47(0), 57(0), 61(0), 64(0), 69(0), 73(0), 76(0), 82(0), 87(0), 88(0), 93(0), 99(2), 105(0), 107(2), 109(0), 114(1), 120(1), 124(0), 127(0), 134(0), 140(0), 144(0), 152(0), 154(1), 157(1), 160(0), 172(1), 200(7), 283(19), 305(36), 314(18), 327(9), 333(7), 334(4), 338(4), 339(7), 341(3), 354(2), 357(2), 362(0), 374(11), 394(35), 402(20), 410(7), 421(50), 428(19), 436(98), 437(12), 442(16), 450(18), 453(6), 466(20), 469(14), 476(31), 483(6), 502(57), 511(112), 531(33), 534(94), 537(12), 542(39), 543(12), 553(31), 567(74), 611(0), 611(1), 613(1), 616(2), 616(0), 617(0), 813(73), 826(91), 831(26), 836(12), 840(93), 843(20), 845(22), 846(1), 846(1), 847(5), 848(3), 851(0), 854(3), 857(29), 870(5), 908(0), 912(1), 919(0), 923(1), 931(0), 947(1), 1027(10), 1030(2), 1032(5), 1036(5), 1037(6), 1040(8), 1080(1), 1083(1), 1085(1), 1085(0), 1086(0), 1089(2), 1148(1), 1150(0), 1151(1), 1278(0), 1279(0), 1281(0), 1421(1), 1424(1), 1425(1), 1431(1), 1432(4), 1435(0), 1469(3), 1471(2), 1471(2), 1475(2), 1477(4), 1478(1), 1876(372), 1914(336), 1963(447), 2009(764), 2013(486), 2030(123), 2053(1004), 2079(1927), 2122(720), 3280(0), 3282(0), 3284(0), 3286(0), 3288(0), 3289(0), 3293(0), 3295(0), 3297(2), 3298(1), 3300(0), 3301(0), 3305(1), 3311(1), 3314(0) | 32(0), 46(0), 50(0), 56(0), 60(0), 64(0), 69(0), 72(1), 76(0), 82(0), 86(0), 87(0), 93(0), 99(2), 103(0), 106(2), 108(0), 113(1), 117(1), 121(0), 126(0), 133(0), 139(0), 143(0), 151(0), 153(0), 156(1), 157(0), 169(1), 195(8), 277(20), 299(37), 309(18), 319(10), 327(8), 329(5), 333(3), 334(7), 336(3), 349(2), 351(2), 358(0), 372(13), 390(28), 398(22), 405(7), 418(43), 422(27), 433(3), 434(99), 438(20), 446(17), 448(7), 463(17), 465(13), 473(32), 478(5), 499(63), 508(120), 528(46), 532(74), 535(15), 540(50), 542(9), 550(28), 565(72), 605(0), 605(1), 606(2), 609(3), 610(0), 610(1), 805(57), 814(28), 818(52), 822(28), 828(51), 831(60), 833(59), 843(17), 844(6), 844(1), 845(2), 848(5), 848(21), 849(1), 858(5), 892(0), 897(0), 901(0), 911(1), 913(0), 934(1), 1026(9), 1030(3), 1030(5), 1035(4), 1037(8), 1040(6), 1081(1), 1083(1), 1084(1), 1084(0), 1085(0), 1089(2), 1147(0), 1149(0), 1150(1), 1278(0), 1279(0), 1281(0), 1421(1), 1424(1), 1425(1), 1430(1), 1431(4), 1434(0), 1468(4), 1470(2), 1471(3), 1476(3), 1477(4), 1479(1), 1889(354), 1925(340), 1967(448), 2013(744), 2017(535), 2033(114), 2057(985), 2082(1877), 2125(683), 3280(0), 3284(0), 3285(0), 3287(0), 3290(0), 3290(0), 3295(1), 3297(0), 3299(3), 3300(1), 3302(1), 3303(0), 3307(1), 3313(1), 3316(1) | 32(0), 39(0), 42(0), 51(0), 53(0), 59(0), 60(0), 68(0), 72(0), 73(0), 81(0), 84(1), 86(0), 90(1), 99(0), 99(0), 100(1), 103(1), 114(1), 119(0), 123(1), 129(0), 131(0), 136(0), 143(0), 146(1), 147(0), 160(0), 196(0), 214(1), 262(2), 282(5), 291(25), 305(2), 306(9), 308(5), 313(6), 315(9), 318(1), 324(3), 333(6), 338(1), 340(0), 373(0), 385(4), 392(5), 399(24), 403(44), 410(8), 413(9), 422(71), 430(18), 431(90), 436(10), 441(85), 444(2), 466(0), 480(37), 493(61), 499(52), 507(38), 510(6), 513(60), 519(4), 527(40), 543(81), 578(0), 579(0), 580(1), 581(1), 585(0), 587(1), 760(38), 784(65), 788(67), 792(36), 796(37), 799(15), 800(94), 806(9), 813(0), 813(1), 814(5), 816(2), 818(0), 821(6), 822(1), 857(0), 863(1), 868(0), 873(1), 873(0), 891(2), 984(7), 990(3), 992(5), 994(4), 996(2), 998(12), 1039(1), 1043(0), 1045(0), 1045(1), 1046(1), 1050(2), 1103(1), 1103(0), 1105(2), 1225(0), 1226(0), 1227(0), 1357(1), 1360(1), 1361(1), 1365(3), 1366(0), 1371(0), 1404(2), 1408(1), 1409(2), 1410(4), 1412(1), 1414(2), 1743(339), 1771(220), 1861(325), 1892(768), 1895(45), 1913(119), 1930(785), 1947(1681), 1990(728), 3173(0), 3174(0), 3176(0), 3178(0), 3179(0), 3181(0), 3186(0), 3186(1), 3190(1), 3190(0), 3191(0), 3192(0), 3196(1), 3200(1), 3204(0) | 32(0), 37(0), 37(0), 50(0), 53(0), 57(0), 59(0), 68(0), 71(0), 73(0), 81(0), 83(1), 85(0), 89(1), 98(1), 98(1), 99(0), 102(1), 111(1), 117(0), 122(1), 129(0), 130(0), 134(0), 141(0), 146(1), 146(0), 158(0), 192(0), 212(1), 256(3), 273(5), 285(23), 299(10), 300(4), 302(4), 307(6), 310(10), 312(1), 319(4), 326(7), 333(1), 336(0), 368(0), 381(5), 390(7), 396(20), 400(45), 406(6), 410(11), 419(60), 424(15), 428(99), 433(6), 438(87), 440(11), 462(0), 477(38), 490(60), 497(65), 505(38), 509(8), 512(60), 517(3), 527(37), 542(73), 571(0), 573(0), 575(1), 575(1), 579(0), 581(2), 747(25), 769(2), 775(73), 778(32), 786(55), 786(78), 794(37), 795(70), 809(6), 811(1), 811(1), 812(4), 814(1), 815(0), 818(1), 842(0), 847(1), 854(0), 858(1), 861(0), 877(1), 983(7), 989(3), 990(5), 993(4), 995(3), 997(12), 1038(1), 1043(0), 1044(0), 1045(1), 1045(1), 1049(3), 1102(0), 1102(0), 1104(1), 1224(0), 1225(0), 1226(0), 1356(1), 1360(1), 1360(1), 1364(3), 1366(1), 1370(0), 1403(3), 1407(2), 1408(2), 1410(4), 1412(1), 1414(2), 1754(324), 1781(213), 1865(329), 1896(765), 1897(62), 1916(109), 1934(771), 1950(1634), 1993(692), 3174(0), 3176(0), 3178(0), 3179(0), 3180(0), 3183(0), 3188(0), 3188(0), 3192(0), 3192(1), 3193(0), 3194(0), 3199(1), 3203(1), 3206(0) |

Table S29 Harmonic vibrational frequencies( $\text{cm}^{-1}$ ) and IR intensities (KM/Mole) of  $\text{Cp}_3\text{Nb}_3(\text{CO})_9$  9-3

| MPW1PW91/SDD                                                                                                                                                                                                                                                                                                                                                                                                                                                                                                                                                                                                                                                                                                                                                                                                                                                                                                                                                                                                                                                                                                                                                                                                                                                                                                           | MPW1PW91/LANL2DZ                                                                                                                                                                                                                                                                                                                                                                                                                                                                                                                                                                                                                                                                                                                                                                                                                                                                                                                                                                                                                                                                                                                                                                                                                                                                                                        | BP86/SDD                                                                                                                                                                                                                                                                                                                                                                                                                                                                                                                                                                                                                                                                                                                                                                                                                                                                                                                                                                                                                                                                                                                                                                                                                                                                                                   | BP86/LANL2DZ                                                                                                                                                                                                                                                                                                                                                                                                                                                                                                                                                                                                                                                                                                                                                                                                                                                                                                                                                                                                                                                                                                                                                                                                                                                                                               |
|------------------------------------------------------------------------------------------------------------------------------------------------------------------------------------------------------------------------------------------------------------------------------------------------------------------------------------------------------------------------------------------------------------------------------------------------------------------------------------------------------------------------------------------------------------------------------------------------------------------------------------------------------------------------------------------------------------------------------------------------------------------------------------------------------------------------------------------------------------------------------------------------------------------------------------------------------------------------------------------------------------------------------------------------------------------------------------------------------------------------------------------------------------------------------------------------------------------------------------------------------------------------------------------------------------------------|-------------------------------------------------------------------------------------------------------------------------------------------------------------------------------------------------------------------------------------------------------------------------------------------------------------------------------------------------------------------------------------------------------------------------------------------------------------------------------------------------------------------------------------------------------------------------------------------------------------------------------------------------------------------------------------------------------------------------------------------------------------------------------------------------------------------------------------------------------------------------------------------------------------------------------------------------------------------------------------------------------------------------------------------------------------------------------------------------------------------------------------------------------------------------------------------------------------------------------------------------------------------------------------------------------------------------|------------------------------------------------------------------------------------------------------------------------------------------------------------------------------------------------------------------------------------------------------------------------------------------------------------------------------------------------------------------------------------------------------------------------------------------------------------------------------------------------------------------------------------------------------------------------------------------------------------------------------------------------------------------------------------------------------------------------------------------------------------------------------------------------------------------------------------------------------------------------------------------------------------------------------------------------------------------------------------------------------------------------------------------------------------------------------------------------------------------------------------------------------------------------------------------------------------------------------------------------------------------------------------------------------------|------------------------------------------------------------------------------------------------------------------------------------------------------------------------------------------------------------------------------------------------------------------------------------------------------------------------------------------------------------------------------------------------------------------------------------------------------------------------------------------------------------------------------------------------------------------------------------------------------------------------------------------------------------------------------------------------------------------------------------------------------------------------------------------------------------------------------------------------------------------------------------------------------------------------------------------------------------------------------------------------------------------------------------------------------------------------------------------------------------------------------------------------------------------------------------------------------------------------------------------------------------------------------------------------------------|
| 26(1), 41(2), 49(0), 54(1), 63(0), 67(0), 74(0), 75(0), 80(0), 85(0), 88(0), 92(0), 99(0), 100(0), 104(0), 106(0), 110(0), 116(0), 117(1), 121(1), 124(0), 134(1), 143(1), 148(1), 154(1), 157(3), 164(2), 174(3), 186(3), 190(0), 290(6), 302(12), 312(33), 321(27), 327(5), 329(12), 333(3), 336(5), 341(11), 351(2), 356(3), 368(23), 372(1), 384(26), 403(9), 424(15), 425(25), 429(31), 440(8), 445(45), 450(13), 455(36), 459(19), 462(17), 469(57), 472(2), 481(2), 503(32), 507(137), 526(45), 538(11), 544(82), 549(43), 550(37), 561(8), 570(18), 610(0), 611(0), 614(1), 615(1), 616(1), 618(0), 803(53), 823(94), 832(33), 837(26), 839(125), 841(26), 845(13), 846(6), 847(5), 849(4), 850(0), 850(2), 852(30), 854(3), 865(13), 906(1), 912(1), 918(0), 921(2), 926(0), 942(0), 1027(9), 1030(3), 1031(2), 1036(2), 1037(4), 1040(10), 1077(1), 1083(0), 1084(1), 1084(0), 1086(0), 1090(1), 1150(0), 1150(0), 1152(1), 1276(0), 1278(0), 1279(0), 1424(1), 1424(2), 1425(3), 1428(1), 1431(1), 1435(0), 1469(2), 1470(5), 1472(2), 1475(1), 1475(2), 1479(3), 1886(396), 1926(713), 1946(382), 1968(176), 2001(862), 2037(45), 2060(1737), 2068(988), 2117(1691), 3279(0), 3282(0), 3285(0), 3286(0), 3286(0), 3295(2), 3295(1), 3296(0), 3298(0), 3299(0), 3302(1), 3309(1), 3311(1), 3312(1), 3324(0) | 29(1), 39(2), 49(0), 52(0), 63(0), 65(0), 71(0), 72(0), 79(0), 85(0), 87(0), 91(0), 98(0), 100(0), 103(0), 105(0), 109(0), 115(0), 116(1), 120(1), 122(0), 132(1), 142(1), 146(1), 152(2), 155(3), 163(1), 176(3), 184(3), 189(0), 286(9), 296(10), 307(31), 314(29), 320(7), 324(7), 327(6), 330(5), 336(10), 347(2), 351(3), 365(19), 368(2), 381(25), 400(8), 420(18), 422(21), 426(32), 436(9), 442(35), 446(20), 451(41), 455(17), 460(18), 465(57), 468(4), 476(4), 501(27), 506(153), 522(47), 537(32), 543(61), 548(41), 549(32), 559(10), 570(21), 605(0), 606(0), 609(0), 610(1), 610(1), 612(0), 795(40), 812(50), 821(60), 823(26), 827(42), 833(83), 835(88), 843(15), 844(4), 845(10), 847(3), 848(6), 848(1), 850(2), 857(13), 892(1), 898(1), 902(0), 913(2), 913(0), 934(0), 1026(9), 1030(3), 1030(3), 1035(2), 1037(4), 1039(10), 1076(2), 1083(1), 1083(1), 1084(0), 1087(1), 1088(1), 1149(0), 1150(0), 1152(1), 1275(0), 1278(0), 1278(0), 1424(1), 1424(2), 1425(4), 1427(1), 1431(1), 1434(0), 1469(1), 1470(6), 1472(2), 1475(2), 1476(3), 1479(3), 1898(384), 1930(557), 1946(427), 1977(259), 2005(835), 2042(38), 2063(1689), 2072(1014), 2120(1665), 3280(0), 3283(0), 3286(0), 3287(0), 3287(0), 3296(2), 3297(1), 3298(1), 3301(0), 3302(0), 3304(1), 3311(1), 3312(1), 3316(1), 3325(1) | 23(0), 32(0), 46(0), 49(0), 51(0), 64(0), 71(0), 73(0), 75(0), 81(0), 85(0), 86(0), 91(0), 94(0), 97(0), 100(1), 105(0), 107(0), 110(0), 113(0), 125(0), 126(1), 136(1), 149(1), 152(0), 156(0), 162(1), 178(0), 189(1), 208(0), 267(3), 276(2), 284(9), 297(7), 301(11), 304(19), 307(4), 312(8), 315(7), 328(5), 331(5), 336(0), 357(7), 365(16), 374(6), 393(24), 400(11), 404(9), 416(79), 418(12), 422(62), 431(32), 435(17), 438(19), 446(44), 459(1), 462(6), 474(36), 478(48), 496(60), 510(50), 513(60), 520(42), 526(16), 532(32), 541(14), 577(1), 577(0), 578(1), 581(0), 582(1), 585(1), 767(48), 781(37), 786(42), 791(91), 800(23), 800(124), 804(10), 808(31), 814(2), 814(1), 816(5), 818(4), 818(2), 820(1), 824(7), 857(3), 861(0), 869(1), 876(0), 879(6), 888(2), 986(8), 989(1), 990(3), 994(3), 1001(10), 1002(3), 1040(1), 1041(1), 1045(0), 1045(1), 1046(0), 1056(1), 1103(1), 1105(0), 1106(2), 1223(0), 1227(0), 1228(0), 1357(1), 1357(3), 1360(2), 1362(1), 1368(0), 1371(0), 1405(3), 1406(2), 1407(2), 1409(1), 1415(1), 1416(2), 1687(348), 1798(316), 1841(454), 1875(552), 1881(82), 1919(35), 1940(1608), 1944(661), 1989(1462), 3172(0), 3174(0), 3176(0), 3176(0), 3179(0), 3186(0), 3187(0), 3188(1), 3188(0), 3188(0), 3195(0), 3198(1), 3199(1), 3202(0), 3213(0) | 21(0), 33(0), 44(0), 49(0), 50(0), 62(0), 69(0), 72(0), 75(0), 79(0), 84(0), 84(0), 90(0), 92(0), 96(0), 99(1), 103(0), 107(0), 109(0), 111(1), 122(0), 125(1), 134(1), 149(1), 151(0), 155(0), 160(1), 177(0), 186(1), 206(0), 260(4), 271(2), 276(8), 290(6), 295(11), 298(21), 300(3), 306(7), 309(8), 322(5), 326(5), 331(1), 355(8), 363(11), 371(8), 388(19), 397(10), 401(10), 414(86), 415(10), 420(45), 428(44), 431(18), 436(21), 442(47), 456(1), 461(6), 472(34), 477(51), 493(58), 507(54), 510(60), 518(44), 525(17), 531(30), 542(15), 571(0), 572(1), 574(1), 575(0), 576(1), 579(1), 754(30), 767(17), 769(37), 780(101), 785(21), 794(91), 796(72), 797(47), 811(6), 812(5), 812(1), 815(1), 816(4), 817(1), 818(1), 840(3), 847(1), 850(1), 862(0), 871(6), 880(2), 984(9), 988(1), 990(3), 994(3), 1001(11), 1002(3), 1039(1), 1041(1), 1045(0), 1045(1), 1045(0), 1056(2), 1103(0), 1105(0), 1106(1), 1223(0), 1226(0), 1227(0), 1357(1), 1357(4), 1359(2), 1361(1), 1367(1), 1370(0), 1404(4), 1406(2), 1407(2), 1409(2), 1415(1), 1416(3), 1700(335), 1807(306), 1847(440), 1878(529), 1882(90), 1922(57), 1942(1526), 1946(694), 1992(1429), 3173(0), 3176(0), 3178(0), 3178(0), 3180(0), 3189(0), 3189(1), 3190(0), 3191(0), 3191(0), 3196(0), 3201(1), 3203(1), 3205(1), 3216(1) |

Table S30 Harmonic vibrational frequencies( $\text{cm}^{-1}$ ) and IR intensities (KM/Mole) of  $\text{Cp}_3\text{Nb}_3(\text{CO})_9$ , 9-4

| MPW1PW91/SDD                                                                                                                                                                                                                                                                                                                                                                                                                                                                                                                                                                                                                                                                                                                                                                                                                                                                                                                                                                                                                                                                                                                                                                                                                                                                                                   | MPW1PW91/LANL2DZ                                                                                                                                                                                                                                                                                                                                                                                                                                                                                                                                                                                                                                                                                                                                                                                                                                                                                                                                                                                                                                                                                                                                                                                                                                                                                              | BP86/SDD                                                                                                                                                                                                                                                                                                                                                                                                                                                                                                                                                                                                                                                                                                                                                                                                                                                                                                                                                                                                                                                                                                                                                                                                                                                                                                | BP86/LANL2DZ                                                                                                                                                                                                                                                                                                                                                                                                                                                                                                                                                                                                                                                                                                                                                                                                                                                                                                                                                                                                                                                                                                                                                                                                                                                                                           |
|----------------------------------------------------------------------------------------------------------------------------------------------------------------------------------------------------------------------------------------------------------------------------------------------------------------------------------------------------------------------------------------------------------------------------------------------------------------------------------------------------------------------------------------------------------------------------------------------------------------------------------------------------------------------------------------------------------------------------------------------------------------------------------------------------------------------------------------------------------------------------------------------------------------------------------------------------------------------------------------------------------------------------------------------------------------------------------------------------------------------------------------------------------------------------------------------------------------------------------------------------------------------------------------------------------------|---------------------------------------------------------------------------------------------------------------------------------------------------------------------------------------------------------------------------------------------------------------------------------------------------------------------------------------------------------------------------------------------------------------------------------------------------------------------------------------------------------------------------------------------------------------------------------------------------------------------------------------------------------------------------------------------------------------------------------------------------------------------------------------------------------------------------------------------------------------------------------------------------------------------------------------------------------------------------------------------------------------------------------------------------------------------------------------------------------------------------------------------------------------------------------------------------------------------------------------------------------------------------------------------------------------|---------------------------------------------------------------------------------------------------------------------------------------------------------------------------------------------------------------------------------------------------------------------------------------------------------------------------------------------------------------------------------------------------------------------------------------------------------------------------------------------------------------------------------------------------------------------------------------------------------------------------------------------------------------------------------------------------------------------------------------------------------------------------------------------------------------------------------------------------------------------------------------------------------------------------------------------------------------------------------------------------------------------------------------------------------------------------------------------------------------------------------------------------------------------------------------------------------------------------------------------------------------------------------------------------------|--------------------------------------------------------------------------------------------------------------------------------------------------------------------------------------------------------------------------------------------------------------------------------------------------------------------------------------------------------------------------------------------------------------------------------------------------------------------------------------------------------------------------------------------------------------------------------------------------------------------------------------------------------------------------------------------------------------------------------------------------------------------------------------------------------------------------------------------------------------------------------------------------------------------------------------------------------------------------------------------------------------------------------------------------------------------------------------------------------------------------------------------------------------------------------------------------------------------------------------------------------------------------------------------------------|
| 20(0), 27(0), 39(1), 49(0), 53(1), 57(0), 61(0), 64(1), 71(1), 76(0), 78(1), 85(0), 88(0), 92(1), 96(1), 101(2), 102(0), 106(1), 112(0), 113(1), 122(1), 127(1), 135(3), 143(2), 150(1), 154(0), 180(4), 184(0), 230(3), 265(11), 301(34), 306(31), 319(3), 322(4), 331(1), 332(8), 337(4), 343(1), 347(8), 347(4), 356(11), 358(7), 366(0), 392(26), 400(12), 407(6), 415(5), 418(9), 426(8), 429(63), 435(33), 439(14), 446(7), 451(2), 456(13), 462(15), 472(1), 491(61), 506(9), 523(57), 526(16), 535(45), 542(4), 545(40), 568(140), 610(0), 613(0), 614(0), 617(0), 619(0), 622(0), 700(144), 806(51), 821(75), 835(89), 839(4), 841(5), 844(42), 845(23), 846(9), 846(16), 846(14), 849(20), 850(4), 851(6), 858(6), 862(11), 904(0), 906(1), 915(1), 933(1), 939(3), 942(3), 1014(8), 1030(9), 1031(4), 1035(7), 1037(4), 1042(13), 1075(0), 1081(0), 1083(1), 1084(1), 1085(2), 1085(1), 1145(0), 1149(1), 1153(1), 1274(0), 1278(0), 1278(0), 1419(6), 1421(1), 1422(8), 1428(1), 1429(1), 1432(2), 1468(1), 1471(4), 1472(3), 1475(2), 1479(2), 1484(2), 1566(141), 1807(371), 1919(566), 2001(612), 2031(494), 2032(499), 2073(455), 2090(1976), 2124(417), 3279(0), 3280(0), 3280(0), 3281(0), 3284(0), 3287(0), 3292(2), 3293(0), 3294(0), 3295(0), 3297(0), 3298(1), 3303(0), 3309(0), 3309(1) | 14(0), 25(0), 38(1), 48(0), 52(1), 55(0), 60(0), 63(1), 70(1), 75(0), 77(1), 84(0), 87(0), 90(1), 94(1), 99(3), 100(0), 105(1), 110(0), 112(0), 120(1), 125(1), 134(3), 141(2), 148(1), 152(0), 177(3), 181(0), 229(4), 262(10), 297(31), 300(35), 314(2), 319(4), 325(2), 327(7), 331(4), 337(1), 342(10), 344(3), 351(14), 354(5), 363(0), 389(26), 398(10), 404(6), 410(6), 414(9), 422(5), 425(55), 431(42), 434(16), 442(5), 446(2), 452(16), 457(17), 469(3), 489(60), 504(9), 521(57), 523(16), 535(42), 542(8), 545(46), 566(145), 604(0), 607(0), 609(0), 611(0), 613(0), 616(0), 695(157), 797(50), 811(56), 821(5), 825(63), 832(52), 834(54), 838(23), 840(54), 843(0), 844(2), 847(3), 847(1), 847(2), 849(10), 850(8), 890(0), 894(0), 902(1), 912(1), 930(3), 931(3), 1013(8), 1029(9), 1030(4), 1034(7), 1037(5), 1041(12), 1075(0), 1081(0), 1082(1), 1083(1), 1084(1), 1084(2), 1145(0), 1148(0), 1152(0), 1274(0), 1277(0), 1278(0), 1419(6), 1421(1), 1422(8), 1428(1), 1429(1), 1431(2), 1468(1), 1471(4), 1471(3), 1475(3), 1479(2), 1484(2), 1581(143), 1822(364), 1932(555), 2007(589), 2035(474), 2037(503), 2077(451), 2093(1968), 2127(364), 3280(0), 3281(0), 3282(0), 3283(0), 3284(0), 3289(0), 3293(2), 3295(0), 3296(0), 3298(0), 3298(1), 3301(1), 3306(0), 3311(1), 3311(0) | 30(0), 33(0), 43(0), 50(0), 54(1), 56(1), 59(1), 62(0), 69(1), 75(0), 75(0), 81(0), 83(0), 91(1), 93(1), 96(1), 99(0), 101(0), 108(2), 110(1), 117(0), 124(0), 128(1), 132(2), 140(2), 148(0), 175(0), 198(4), 228(1), 255(12), 280(34), 287(15), 304(5), 306(1), 311(2), 314(4), 315(3), 321(0), 327(16), 332(2), 337(3), 341(8), 346(2), 364(23), 379(13), 385(10), 391(4), 397(5), 403(8), 410(79), 416(18), 419(22), 428(4), 430(15), 434(3), 441(5), 448(1), 465(28), 473(55), 495(20), 499(23), 510(27), 512(22), 521(14), 546(119), 576(0), 580(1), 582(0), 585(0), 586(0), 589(0), 633(117), 768(37), 783(79), 793(5), 799(97), 799(27), 802(72), 805(26), 807(0), 814(2), 814(2), 815(3), 815(4), 818(0), 818(0), 821(15), 856(0), 856(1), 869(1), 880(1), 885(4), 892(2), 973(7), 989(8), 990(4), 996(7), 998(4), 1000(12), 1036(0), 1042(0), 1043(1), 1044(1), 1045(3), 1047(0), 1098(1), 1103(1), 1108(0), 1222(0), 1225(0), 1226(0), 1354(7), 1356(5), 1358(1), 1363(1), 1366(1), 1369(1), 1401(0), 1408(2), 1409(3), 1412(2), 1415(2), 1418(2), 1481(133), 1708(260), 1777(439), 1880(363), 1901(352), 1907(600), 1940(465), 1959(1661), 1988(350), 3171(0), 3171(0), 3172(0), 3173(0), 3176(0), 3178(0), 3184(0), 3184(1), 3185(0), 3186(1), 3188(0), 3190(0), 3194(0), 3199(0), 3200(0) | 30(0), 33(0), 42(1), 47(0), 52(1), 54(1), 58(1), 60(0), 68(1), 73(0), 75(0), 79(0), 82(0), 90(1), 92(1), 94(1), 98(0), 100(0), 106(1), 109(0), 116(0), 122(1), 126(1), 130(3), 138(2), 146(0), 172(0), 195(4), 228(2), 252(10), 274(34), 279(16), 299(5), 301(1), 307(4), 309(1), 310(3), 315(1), 323(18), 327(2), 332(3), 337(7), 342(2), 362(24), 376(12), 382(10), 387(4), 393(5), 398(7), 407(80), 412(17), 415(27), 422(5), 427(14), 431(5), 439(7), 444(1), 463(27), 470(54), 494(20), 497(24), 511(17), 513(33), 520(16), 544(124), 570(0), 575(1), 576(0), 579(1), 580(0), 584(0), 628(127), 758(33), 774(47), 776(6), 786(64), 788(35), 794(93), 796(69), 803(1), 805(3), 808(14), 812(2), 812(2), 813(2), 815(0), 816(1), 842(1), 846(0), 857(1), 860(1), 876(3), 878(2), 972(7), 989(9), 989(4), 995(7), 997(4), 999(12), 1036(0), 1042(0), 1042(1), 1044(1), 1044(3), 1046(0), 1097(0), 1102(1), 1107(0), 1221(0), 1224(0), 1225(0), 1355(7), 1355(6), 1358(1), 1363(1), 1365(1), 1368(1), 1400(1), 1407(2), 1409(3), 1412(3), 1415(2), 1418(2), 1495(134), 1720(251), 1788(427), 1884(341), 1905(359), 1911(578), 1943(466), 1961(1643), 1991(308), 3172(0), 3173(0), 3173(0), 3175(0), 3177(0), 3180(0), 3186(1), 3187(0), 3188(0), 3189(1), 3190(0), 3193(0), 3198(0), 3202(0), 3202(1) |

Table S31 Harmonic vibrational frequencies( $\text{cm}^{-1}$ ) and IR intensities (KM/Mole) of  $\text{Cp}_3\text{Nb}_3(\text{CO})_8$  8-1

| MPW1PW91/SDD                                                                                                                                                                                                                                                                                                                                                                                                                                                                                                                                                                                                                                                                                                                                                                                                                                                                                                                                                                                                                                                                                                                                                                                                                                               | MPW1PW91/LANL2DZ                                                                                                                                                                                                                                                                                                                                                                                                                                                                                                                                                                                                                                                                                                                                                                                                                                                                                                                                                                                                                                                                                                                                                                                                                                             | BP86/SDD                                                                                                                                                                                                                                                                                                                                                                                                                                                                                                                                                                                                                                                                                                                                                                                                                                                                                                                                                                                                                                                                                                                                                                                                                                       | BP86/LANL2DZ                                                                                                                                                                                                                                                                                                                                                                                                                                                                                                                                                                                                                                                                                                                                                                                                                                                                                                                                                                                                                                                                                                                                                                                                                                     |
|------------------------------------------------------------------------------------------------------------------------------------------------------------------------------------------------------------------------------------------------------------------------------------------------------------------------------------------------------------------------------------------------------------------------------------------------------------------------------------------------------------------------------------------------------------------------------------------------------------------------------------------------------------------------------------------------------------------------------------------------------------------------------------------------------------------------------------------------------------------------------------------------------------------------------------------------------------------------------------------------------------------------------------------------------------------------------------------------------------------------------------------------------------------------------------------------------------------------------------------------------------|--------------------------------------------------------------------------------------------------------------------------------------------------------------------------------------------------------------------------------------------------------------------------------------------------------------------------------------------------------------------------------------------------------------------------------------------------------------------------------------------------------------------------------------------------------------------------------------------------------------------------------------------------------------------------------------------------------------------------------------------------------------------------------------------------------------------------------------------------------------------------------------------------------------------------------------------------------------------------------------------------------------------------------------------------------------------------------------------------------------------------------------------------------------------------------------------------------------------------------------------------------------|------------------------------------------------------------------------------------------------------------------------------------------------------------------------------------------------------------------------------------------------------------------------------------------------------------------------------------------------------------------------------------------------------------------------------------------------------------------------------------------------------------------------------------------------------------------------------------------------------------------------------------------------------------------------------------------------------------------------------------------------------------------------------------------------------------------------------------------------------------------------------------------------------------------------------------------------------------------------------------------------------------------------------------------------------------------------------------------------------------------------------------------------------------------------------------------------------------------------------------------------|--------------------------------------------------------------------------------------------------------------------------------------------------------------------------------------------------------------------------------------------------------------------------------------------------------------------------------------------------------------------------------------------------------------------------------------------------------------------------------------------------------------------------------------------------------------------------------------------------------------------------------------------------------------------------------------------------------------------------------------------------------------------------------------------------------------------------------------------------------------------------------------------------------------------------------------------------------------------------------------------------------------------------------------------------------------------------------------------------------------------------------------------------------------------------------------------------------------------------------------------------|
| 28(0), 35(0), 49(0), 61(1), 66(1), 72(0), 74(0), 78(0), 86(0), 91(0), 94(1), 94(0), 96(1), 100(1), 101(0), 108(2), 111(1), 116(0), 119(1), 123(2), 133(1), 145(2), 145(2), 155(3), 157(1), 162(1), 185(1), 220(1), 305(32), 315(3), 322(3), 324(2), 336(4), 340(3), 342(2), 345(4), 356(0), 359(5), 383(25), 393(15), 408(16), 425(27), 430(41), 438(46), 444(65), 447(11), 455(4), 460(4), 463(7), 469(0), 483(7), 494(12), 511(21), 518(30), 528(79), 539(37), 547(5), 550(6), 560(21), 572(17), 583(74), 610(4), 612(1), 614(1), 614(1), 617(0), 619(2), 812(59), 825(87), 835(104), 837(60), 844(2), 846(1), 847(5), 848(1), 848(2), 850(4), 852(9), 852(5), 852(10), 857(18), 862(45), 910(0), 914(1), 916(0), 932(4), 939(0), 943(1), 1029(4), 1033(5), 1033(6), 1034(6), 1035(4), 1043(9), 1081(1), 1082(1), 1084(2), 1085(0), 1086(2), 1087(6), 1151(0), 1152(0), 1152(0), 1278(0), 1279(0), 1280(0), 1420(1), 1425(1), 1426(1), 1427(2), 1430(4), 1436(3), 1470(4), 1471(4), 1473(2), 1474(4), 1481(2), 1482(4), 1783(223), 1943(55), 1960(360), 1999(1118), 2008(1056), 2021(1376), 2050(1318), 2089(387), 3279(0), 3281(0), 3282(0), 3286(0), 3287(0), 3287(0), 3295(1), 3295(1), 3296(1), 3298(0), 3300(0), 3302(0), 3314(0), 3315(0), 3317(0) | 29(0), 33(0), 49(0), 60(1), 64(0), 70(0), 74(0), 77(0), 84(0), 89(0), 92(3), 94(0), 96(0), 98(0), 100(1), 106(1), 111(0), 113(0), 119(1), 123(2), 130(1), 144(2), 144(1), 153(3), 155(1), 160(1), 179(0), 211(1), 299(34), 311(3), 315(4), 319(1), 330(4), 334(3), 336(2), 339(4), 351(0), 356(6), 382(24), 387(14), 405(20), 422(15), 429(33), 436(62), 441(60), 445(10), 452(3), 456(5), 458(14), 465(0), 478(7), 492(11), 508(29), 514(23), 526(83), 539(33), 548(1), 549(9), 560(40), 573(15), 578(66), 604(4), 607(0), 607(1), 609(1), 612(0), 615(2), 805(37), 815(82), 828(87), 831(76), 831(33), 840(2), 841(16), 843(5), 843(31), 844(3), 846(3), 846(10), 847(4), 849(33), 849(1), 900(1), 900(0), 904(0), 922(5), 925(1), 927(0), 1027(4), 1032(4), 1032(7), 1033(6), 1034(4), 1041(10), 1080(1), 1082(2), 1082(7), 1084(0), 1084(2), 1085(1), 1151(0), 1151(0), 1152(0), 1277(0), 1277(0), 1279(0), 1420(2), 1425(2), 1426(0), 1427(2), 1430(4), 1435(3), 1469(5), 1471(4), 1473(3), 1474(4), 1481(2), 1483(4), 1802(233), 1950(63), 1967(291), 2004(1017), 2012(1176), 2026(1334), 2053(1238), 2092(384), 3280(0), 3283(0), 3284(0), 3287(0), 3288(0), 3289(0), 3297(1), 3297(1), 3298(1), 3301(0), 3302(0), 3303(0), 3316(0), 3317(0), 3318(0) | 25(0), 30(0), 40(0), 57(1), 60(1), 66(0), 68(0), 72(0), 81(1), 85(0), 87(0), 87(0), 90(1), 94(0), 96(0), 101(1), 104(1), 107(1), 111(0), 115(2), 125(1), 136(1), 137(1), 147(2), 152(2), 158(1), 178(1), 211(1), 292(27), 294(3), 299(5), 303(3), 313(4), 317(8), 320(1), 321(4), 333(0), 338(3), 366(16), 375(9), 386(7), 406(24), 408(26), 421(57), 425(40), 430(2), 440(12), 441(12), 445(7), 452(1), 459(7), 474(7), 487(9), 496(22), 506(65), 513(21), 517(6), 523(6), 529(15), 541(11), 552(67), 579(5), 580(0), 581(1), 582(1), 586(0), 587(1), 777(49), 787(80), 794(74), 797(98), 804(17), 805(3), 809(16), 810(10), 812(3), 815(0), 816(3), 816(5), 817(2), 819(0), 822(39), 863(0), 867(2), 868(0), 882(3), 884(0), 892(1), 988(3), 991(4), 992(7), 994(4), 994(5), 1003(9), 1041(1), 1043(1), 1045(1), 1045(4), 1046(5), 1046(1), 1105(0), 1105(0), 1106(0), 1225(0), 1226(0), 1227(0), 1355(1), 1360(2), 1362(1), 1363(1), 1365(3), 1371(2), 1406(4), 1407(4), 1409(3), 1411(2), 1416(2), 1418(4), 1682(161), 1828(55), 1844(328), 1881(837), 1890(798), 1901(1074), 1927(1334), 1957(256), 3171(0), 3172(0), 3175(0), 3178(0), 3178(0), 3179(0), 3187(1), 3187(1), 3187(0), 3190(0), 3192(0), 3194(0), 3204(0), 3207(0), 3207(0) | 30(0), 31(0), 43(0), 56(1), 59(0), 66(0), 68(0), 70(0), 79(1), 83(0), 85(0), 87(1), 89(0), 93(1), 94(0), 99(1), 104(1), 105(1), 110(1), 115(2), 123(1), 135(2), 136(1), 144(1), 150(3), 153(1), 172(0), 203(1), 285(26), 290(4), 291(7), 297(1), 306(4), 310(11), 314(1), 315(4), 327(0), 335(4), 365(14), 370(8), 384(8), 405(28), 406(11), 417(46), 420(50), 428(2), 436(19), 438(20), 442(5), 449(1), 455(7), 472(7), 484(11), 492(23), 504(68), 511(17), 516(0), 522(6), 529(35), 540(17), 548(50), 572(4), 575(0), 575(1), 576(1), 580(0), 582(1), 756(32), 777(67), 786(23), 789(73), 791(67), 794(10), 798(47), 799(41), 806(44), 810(0), 812(0), 813(1), 814(0), 815(2), 816(0), 850(1), 853(1), 855(0), 873(0), 874(4), 874(1), 986(4), 990(4), 992(8), 993(6), 994(4), 1000(9), 1041(1), 1041(3), 1042(6), 1044(1), 1045(1), 1046(1), 1104(0), 1105(0), 1105(0), 1224(0), 1225(0), 1226(0), 1355(2), 1360(2), 1361(1), 1362(1), 1364(3), 1370(2), 1404(5), 1407(4), 1408(3), 1410(2), 1416(2), 1419(4), 1699(165), 1833(66), 1850(291), 1885(762), 1894(857), 1905(1023), 1930(1272), 1959(263), 3171(0), 3174(0), 3176(0), 3180(0), 3180(0), 3181(0), 3189(1), 3189(1), 3191(1), 3193(0), 3194(0), 3195(0), 3206(0), 3208(0), 3209(0) |

Table S32 Harmonic vibrational frequencies( $\text{cm}^{-1}$ ) and IR intensities (KM/Mole) of  $\text{Cp}_3\text{Nb}_3(\text{CO})_8$  8-2

| MPW1PW91/SDD                                                                                                                                                                                                                                                                                                                                                                                                                                                                                                                                                                                                                                                                                                                                                                                                                                                                                                                                                                                                                                                                                                                                                                                                                                                | MPW1PW91/LANL2DZ                                                                                                                                                                                                                                                                                                                                                                                                                                                                                                                                                                                                                                                                                                                                                                                                                                                                                                                                                                                                                                                                                                                                                                                                                                              | BP86/SDD                                                                                                                                                                                                                                                                                                                                                                                                                                                                                                                                                                                                                                                                                                                                                                                                                                                                                                                                                                                                                                                                                                                                                                                                                                          | BP86/LANL2DZ                                                                                                                                                                                                                                                                                                                                                                                                                                                                                                                                                                                                                                                                                                                                                                                                                                                                                                                                                                                                                                                                                                                                                                                                                                     |
|-------------------------------------------------------------------------------------------------------------------------------------------------------------------------------------------------------------------------------------------------------------------------------------------------------------------------------------------------------------------------------------------------------------------------------------------------------------------------------------------------------------------------------------------------------------------------------------------------------------------------------------------------------------------------------------------------------------------------------------------------------------------------------------------------------------------------------------------------------------------------------------------------------------------------------------------------------------------------------------------------------------------------------------------------------------------------------------------------------------------------------------------------------------------------------------------------------------------------------------------------------------|---------------------------------------------------------------------------------------------------------------------------------------------------------------------------------------------------------------------------------------------------------------------------------------------------------------------------------------------------------------------------------------------------------------------------------------------------------------------------------------------------------------------------------------------------------------------------------------------------------------------------------------------------------------------------------------------------------------------------------------------------------------------------------------------------------------------------------------------------------------------------------------------------------------------------------------------------------------------------------------------------------------------------------------------------------------------------------------------------------------------------------------------------------------------------------------------------------------------------------------------------------------|---------------------------------------------------------------------------------------------------------------------------------------------------------------------------------------------------------------------------------------------------------------------------------------------------------------------------------------------------------------------------------------------------------------------------------------------------------------------------------------------------------------------------------------------------------------------------------------------------------------------------------------------------------------------------------------------------------------------------------------------------------------------------------------------------------------------------------------------------------------------------------------------------------------------------------------------------------------------------------------------------------------------------------------------------------------------------------------------------------------------------------------------------------------------------------------------------------------------------------------------------|--------------------------------------------------------------------------------------------------------------------------------------------------------------------------------------------------------------------------------------------------------------------------------------------------------------------------------------------------------------------------------------------------------------------------------------------------------------------------------------------------------------------------------------------------------------------------------------------------------------------------------------------------------------------------------------------------------------------------------------------------------------------------------------------------------------------------------------------------------------------------------------------------------------------------------------------------------------------------------------------------------------------------------------------------------------------------------------------------------------------------------------------------------------------------------------------------------------------------------------------------|
| 18(0), 36(0), 39(1), 46(0), 47(0), 63(0), 69(1), 74(0), 78(0), 86(0), 88(0), 93(2), 96(2), 99(0), 104(0), 106(0), 109(1), 120(0), 125(1), 130(1), 134(1), 142(1), 151(3), 158(0), 164(0), 177(1), 240(1), 288(1), 297(2), 305(2), 312(9), 324(5), 325(2), 332(3), 341(4), 346(2), 357(4), 381(7), 385(44), 396(6), 401(22), 411(55), 429(20), 439(14), 443(34), 445(42), 449(1), 457(17), 462(33), 466(15), 477(7), 482(4), 490(17), 499(6), 513(17), 525(39), 542(14), 563(10), 571(8), 584(44), 609(3), 612(6), 613(0), 616(1), 617(1), 620(1), 631(38), 802(51), 820(89), 826(104), 830(76), 835(27), 839(12), 842(12), 845(19), 849(7), 849(9), 850(1), 850(3), 852(8), 855(21), 856(25), 906(0), 910(2), 920(4), 930(1), 933(3), 946(4), 1027(5), 1028(5), 1028(6), 1035(4), 1036(7), 1039(3), 1079(0), 1081(3), 1081(1), 1082(2), 1084(0), 1089(1), 1147(2), 1149(0), 1151(0), 1276(0), 1278(0), 1280(0), 1417(0), 1417(2), 1420(4), 1427(3), 1428(1), 1429(3), 1470(2), 1471(1), 1474(5), 1476(7), 1476(1), 1481(1), 1517(132), 1905(182), 1998(725), 2011(570), 2024(526), 2058(1047), 2062(1942), 2102(945), 3277(0), 3279(0), 3281(0), 3284(0), 3287(0), 3288(0), 3293(1), 3297(0), 3298(0), 3300(0), 3300(0), 3304(1), 3313(0), 3316(1), 3322(0) | 19(0), 35(0), 37(1), 44(0), 48(0), 63(0), 68(1), 73(0), 77(0), 84(0), 87(0), 94(2), 95(2), 98(0), 104(0), 106(0), 110(1), 121(0), 126(1), 129(1), 133(1), 142(1), 151(3), 159(0), 163(1), 177(1), 236(1), 280(1), 291(2), 298(2), 305(8), 318(6), 320(1), 326(3), 334(6), 341(2), 352(3), 378(7), 380(45), 392(5), 400(25), 409(49), 426(18), 436(24), 440(20), 442(50), 446(2), 455(18), 459(39), 464(13), 475(4), 481(3), 488(19), 498(7), 513(18), 524(39), 541(17), 561(12), 571(6), 584(46), 604(3), 607(5), 608(1), 612(2), 612(0), 615(1), 628(40), 798(41), 810(62), 820(110), 822(53), 825(69), 831(15), 833(15), 839(41), 845(20), 845(30), 847(2), 848(0), 849(0), 850(11), 852(10), 895(1), 902(2), 909(4), 918(1), 923(4), 934(3), 1027(5), 1027(2), 1027(9), 1035(4), 1037(7), 1039(3), 1079(0), 1080(3), 1081(1), 1082(2), 1084(1), 1089(1), 1148(1), 1150(0), 1152(1), 1276(0), 1277(0), 1279(0), 1418(0), 1418(2), 1420(4), 1427(1), 1428(2), 1429(3), 1470(2), 1472(2), 1474(6), 1477(7), 1477(1), 1482(1), 1539(137), 1907(185), 2000(722), 2016(560), 2028(542), 2062(1128), 2066(1701), 2105(977), 3277(0), 3279(0), 3281(0), 3285(0), 3287(0), 3288(0), 3294(1), 3299(1), 3299(0), 3301(0), 3301(0), 3306(1), 3314(1), 3319(1), 3325(1) | 22(0), 33(0), 37(0), 41(0), 54(0), 61(0), 66(0), 73(1), 75(0), 82(0), 84(0), 88(0), 91(2), 95(1), 101(0), 104(0), 105(1), 116(0), 121(1), 124(1), 129(1), 138(1), 142(2), 152(0), 156(1), 171(0), 226(1), 268(2), 277(3), 283(2), 296(8), 301(5), 304(1), 310(3), 319(4), 325(4), 335(1), 364(5), 370(23), 380(5), 382(15), 405(70), 411(10), 419(2), 424(26), 428(15), 432(9), 437(49), 446(20), 448(15), 457(2), 465(3), 470(10), 476(5), 490(13), 498(28), 515(12), 533(8), 542(7), 550(35), 577(17), 580(1), 581(1), 583(2), 584(0), 586(0), 590(20), 764(40), 782(72), 786(47), 790(77), 791(76), 798(6), 804(18), 805(49), 812(3), 814(44), 817(1), 818(1), 818(2), 819(3), 821(5), 855(0), 867(4), 869(2), 880(4), 882(2), 899(3), 987(1), 987(9), 989(5), 995(4), 995(5), 1000(3), 1041(3), 1041(0), 1042(1), 1044(2), 1046(0), 1050(1), 1101(2), 1103(0), 1105(0), 1225(0), 1225(0), 1227(0), 1353(0), 1353(2), 1356(4), 1362(1), 1363(1), 1365(2), 1406(2), 1408(1), 1409(5), 1411(6), 1412(1), 1416(1), 1443(104), 1794(123), 1878(529), 1894(492), 1904(341), 1931(854), 1936(1916), 1971(744), 3169(0), 3170(0), 3174(0), 3176(0), 3178(0), 3180(0), 3185(0), 3189(0), 3189(0), 3191(0), 3192(0), 3195(1), 3203(0), 3206(0), 3217(1) | 25(0), 30(0), 38(0), 42(0), 53(0), 63(0), 66(1), 74(1), 76(0), 81(0), 83(0), 89(0), 90(2), 94(1), 100(0), 103(0), 104(2), 115(0), 120(1), 123(1), 127(1), 137(1), 141(3), 152(0), 155(0), 169(0), 222(1), 259(1), 270(4), 275(3), 287(8), 295(4), 298(2), 303(4), 309(5), 320(3), 330(1), 362(5), 367(22), 377(3), 380(17), 403(69), 408(12), 418(2), 421(34), 425(4), 429(11), 435(56), 444(20), 447(12), 455(2), 464(6), 468(8), 475(6), 490(13), 497(27), 515(13), 533(10), 542(5), 551(36), 571(5), 573(10), 576(2), 577(1), 580(0), 581(0), 586(23), 757(26), 772(53), 779(34), 783(85), 784(96), 786(7), 795(22), 799(65), 806(57), 809(3), 815(0), 815(0), 816(1), 817(1), 819(5), 847(1), 857(3), 859(4), 870(4), 871(3), 888(3), 986(1), 987(9), 989(5), 995(4), 996(6), 999(3), 1041(1), 1041(4), 1042(1), 1044(2), 1046(0), 1049(1), 1102(1), 1104(0), 1105(1), 1225(0), 1225(0), 1227(0), 1352(0), 1354(2), 1356(4), 1362(1), 1364(1), 1365(2), 1406(2), 1409(2), 1409(6), 1411(5), 1412(1), 1417(1), 1463(105), 1798(120), 1880(518), 1897(478), 1908(340), 1934(822), 1939(1856), 1973(738), 3169(0), 3171(0), 3174(0), 3178(0), 3178(0), 3181(0), 3187(1), 3190(0), 3191(0), 3192(0), 3194(0), 3197(1), 3205(0), 3210(0), 3218(1) |

Table S33 Harmonic vibrational frequencies( $\text{cm}^{-1}$ ) and IR intensities (KM/Mole) of  $\text{Cp}_3\text{Nb}_3(\text{CO})_8$  8-3

| MPW1PW91/SDD                                                                                                                                                                                                                                                                                                                                                                                                                                                                                                                                                                                                                                                                                                                                                                                                                                                                                                                                                                                                                                                                                                                                                                                                                                                  | MPW1PW91/LANL2DZ                                                                                                                                                                                                                                                                                                                                                                                                                                                                                                                                                                                                                                                                                                                                                                                                                                                                                                                                                                                                                                                                                                                                                                                                                                           | BP86/SDD                                                                                                                                                                                                                                                                                                                                                                                                                                                                                                                                                                                                                                                                                                                                                                                                                                                                                                                                                                                                                                                                                                                                                                                                                                            | BP86/LANL2DZ                                                                                                                                                                                                                                                                                                                                                                                                                                                                                                                                                                                                                                                                                                                                                                                                                                                                                                                                                                                                                                                                                                                                                                                                                                     |
|---------------------------------------------------------------------------------------------------------------------------------------------------------------------------------------------------------------------------------------------------------------------------------------------------------------------------------------------------------------------------------------------------------------------------------------------------------------------------------------------------------------------------------------------------------------------------------------------------------------------------------------------------------------------------------------------------------------------------------------------------------------------------------------------------------------------------------------------------------------------------------------------------------------------------------------------------------------------------------------------------------------------------------------------------------------------------------------------------------------------------------------------------------------------------------------------------------------------------------------------------------------|------------------------------------------------------------------------------------------------------------------------------------------------------------------------------------------------------------------------------------------------------------------------------------------------------------------------------------------------------------------------------------------------------------------------------------------------------------------------------------------------------------------------------------------------------------------------------------------------------------------------------------------------------------------------------------------------------------------------------------------------------------------------------------------------------------------------------------------------------------------------------------------------------------------------------------------------------------------------------------------------------------------------------------------------------------------------------------------------------------------------------------------------------------------------------------------------------------------------------------------------------------|-----------------------------------------------------------------------------------------------------------------------------------------------------------------------------------------------------------------------------------------------------------------------------------------------------------------------------------------------------------------------------------------------------------------------------------------------------------------------------------------------------------------------------------------------------------------------------------------------------------------------------------------------------------------------------------------------------------------------------------------------------------------------------------------------------------------------------------------------------------------------------------------------------------------------------------------------------------------------------------------------------------------------------------------------------------------------------------------------------------------------------------------------------------------------------------------------------------------------------------------------------|--------------------------------------------------------------------------------------------------------------------------------------------------------------------------------------------------------------------------------------------------------------------------------------------------------------------------------------------------------------------------------------------------------------------------------------------------------------------------------------------------------------------------------------------------------------------------------------------------------------------------------------------------------------------------------------------------------------------------------------------------------------------------------------------------------------------------------------------------------------------------------------------------------------------------------------------------------------------------------------------------------------------------------------------------------------------------------------------------------------------------------------------------------------------------------------------------------------------------------------------------|
| 21(1), 37(0), 41(0), 55(1), 59(0), 65(0), 73(0), 76(1), 78(1), 84(0), 88(0), 93(1), 95(0), 98(0), 103(0), 104(0), 106(1), 112(2), 118(1), 125(1), 132(0), 144(1), 150(2), 159(1), 167(1), 182(0), 217(3), 232(1), 310(21), 321(20), 325(1), 329(6), 332(5), 335(6), 339(2), 343(9), 347(3), 357(1), 358(12), 365(23), 388(21), 398(13), 404(18), 413(38), 416(27), 429(4), 441(9), 444(20), 452(9), 457(4), 464(14), 468(24), 482(13), 490(9), 503(56), 527(25), 532(46), 544(5), 552(12), 562(14), 587(85), 609(1), 614(1), 615(0), 615(1), 619(0), 620(0), 827(101), 830(28), 831(82), 836(112), 846(2), 846(6), 847(17), 848(4), 849(10), 850(5), 851(6), 852(5), 853(7), 859(10), 867(24), 921(2), 922(3), 928(1), 931(7), 938(0), 942(0), 1028(10), 1032(5), 1033(7), 1037(4), 1037(4), 1039(8), 1081(1), 1082(2), 1084(0), 1085(0), 1085(0), 1087(0), 1151(2), 1152(0), 1154(0), 1278(0), 1278(0), 1279(0), 1423(2), 1426(0), 1427(0), 1432(2), 1432(3), 1437(1), 1469(1), 1472(3), 1473(5), 1476(1), 1479(5), 1485(2), 1837(695), 1859(818), 1955(293), 1966(360), 2022(1065), 2034(724), 2056(607), 2105(1210), 3279(0), 3280(0), 3281(1), 3285(0), 3285(0), 3291(0), 3291(1), 3295(0), 3297(1), 3300(0), 3300(0), 3302(2), 3303(0), 3311(0), 3312(1) | 21(1), 39(0), 42(1), 54(1), 58(0), 65(0), 71(0), 75(0), 77(1), 84(1), 87(0), 93(0), 93(0), 97(0), 102(0), 103(0), 105(1), 109(2), 117(1), 124(1), 129(0), 143(0), 148(2), 157(1), 165(1), 180(0), 212(2), 232(1), 307(23), 315(11), 317(5), 322(7), 325(7), 329(5), 334(2), 339(9), 342(3), 353(1), 354(10), 362(22), 384(23), 394(15), 401(18), 411(40), 414(25), 426(4), 438(9), 440(18), 448(9), 452(3), 460(13), 464(23), 477(17), 489(9), 501(58), 526(34), 532(50), 544(6), 552(13), 561(14), 587(92), 603(1), 609(2), 609(0), 610(2), 613(0), 614(0), 808(3), 815(93), 822(81), 831(128), 834(15), 835(39), 840(7), 843(5), 845(2), 845(4), 847(0), 848(5), 849(0), 851(4), 853(36), 907(5), 907(4), 909(2), 910(1), 923(0), 925(0), 1028(10), 1031(5), 1032(7), 1036(3), 1036(6), 1038(8), 1080(1), 1081(2), 1083(0), 1084(1), 1085(0), 1086(0), 1151(1), 1151(0), 1153(0), 1277(0), 1277(0), 1279(0), 1423(2), 1426(1), 1427(0), 1431(3), 1432(3), 1436(1), 1469(1), 1472(4), 1473(5), 1476(2), 1479(5), 1485(3), 1850(725), 1872(764), 1959(136), 1965(528), 2027(1019), 2041(712), 2062(583), 2108(1175), 3280(0), 3281(0), 3282(1), 3287(0), 3287(0), 3292(1), 3293(1), 3297(0), 3299(1), 3302(1), 3303(0), 3305(3), 3305(0), 3314(1), 3315(1) | 21(1), 26(0), 33(0), 50(0), 54(0), 58(1), 67(0), 69(0), 72(1), 78(1), 79(0), 84(1), 92(0), 93(0), 97(0), 101(1), 101(0), 109(1), 111(0), 118(1), 128(0), 134(0), 139(2), 147(1), 156(0), 178(0), 209(1), 224(0), 292(21), 301(13), 304(2), 306(2), 307(2), 309(7), 313(3), 323(5), 325(4), 334(0), 339(12), 347(13), 363(16), 378(15), 383(18), 389(17), 392(22), 410(3), 420(6), 426(4), 434(34), 438(14), 442(16), 448(6), 459(6), 463(4), 475(38), 495(12), 500(40), 510(3), 520(16), 538(10), 553(66), 576(1), 579(0), 583(2), 585(1), 587(0), 587(0), 787(49), 790(85), 795(133), 796(41), 804(12), 804(28), 810(8), 810(14), 814(2), 815(9), 818(1), 818(13), 818(0), 819(4), 820(10), 870(2), 873(3), 878(1), 884(7), 885(1), 889(1), 989(9), 991(8), 992(4), 996(5), 997(4), 998(8), 1041(2), 1043(1), 1046(0), 1046(0), 1046(0), 1048(0), 1106(2), 1107(0), 1108(0), 1224(0), 1226(0), 1227(0), 1359(1), 1361(0), 1363(0), 1367(2), 1368(2), 1372(1), 1407(1), 1409(4), 1409(3), 1413(1), 1414(4), 1418(3), 1731(504), 1748(547), 1832(349), 1862(162), 1889(891), 1909(505), 1928(623), 1974(1024), 3172(0), 3172(0), 3173(1), 3176(0), 3177(0), 3181(0), 3183(0), 3187(0), 3188(1), 3190(0), 3190(0), 3192(1), 3195(0), 3201(0), 3201(0) | 14(1), 26(0), 33(0), 47(0), 52(0), 56(0), 66(0), 68(0), 71(0), 78(1), 79(0), 83(1), 90(0), 92(0), 95(0), 99(0), 100(1), 106(2), 110(0), 115(1), 126(0), 133(0), 136(2), 145(1), 156(0), 176(0), 204(1), 223(0), 287(18), 293(15), 297(1), 298(3), 300(2), 301(10), 307(4), 318(2), 319(6), 330(1), 335(9), 343(14), 361(16), 376(16), 381(19), 387(21), 390(19), 409(2), 417(6), 421(3), 432(29), 435(13), 438(15), 445(7), 457(10), 461(3), 474(39), 495(17), 500(45), 510(3), 521(17), 537(9), 553(72), 570(1), 573(0), 577(2), 579(1), 580(0), 581(0), 770(9), 778(54), 782(79), 789(124), 792(35), 793(16), 795(29), 798(10), 806(44), 812(1), 813(4), 814(1), 815(3), 816(0), 817(1), 857(3), 859(1), 860(3), 863(5), 869(0), 873(1), 989(9), 990(8), 991(5), 995(5), 996(3), 997(9), 1040(2), 1043(1), 1045(0), 1045(0), 1046(0), 1047(0), 1106(0), 1106(1), 1108(0), 1223(0), 1226(0), 1226(0), 1358(1), 1360(0), 1363(0), 1366(2), 1368(3), 1371(1), 1406(1), 1409(3), 1409(4), 1412(2), 1414(4), 1418(3), 1742(544), 1760(481), 1839(329), 1861(194), 1893(855), 1914(481), 1932(609), 1976(995), 3173(1), 3173(0), 3174(1), 3179(0), 3179(0), 3183(0), 3185(0), 3189(0), 3190(1), 3193(0), 3193(0), 3195(1), 3197(0), 3204(0), 3205(1) |

Table S34 Harmonic vibrational frequencies( $\text{cm}^{-1}$ ) and IR intensities (KM/Mole) of  $\text{Cp}_3\text{Nb}_3(\text{CO})_8$  8-4

| MPW1PW91/SDD                                                                                                                                                                                                                                                                                                                                                                                                                                                                                                                                                                                                                                                                                                                                                                                                                                                                                                                                                                                                                                                                                                                                                                                                                                            | MPW1PW91/LANL2DZ                                                                                                                                                                                                                                                                                                                                                                                                                                                                                                                                                                                                                                                                                                                                                                                                                                                                                                                                                                                                                                                                                                                                                                                                                                               | BP86/SDD                                                                                                                                                                                                                                                                                                                                                                                                                                                                                                                                                                                                                                                                                                                                                                                                                                                                                                                                                                                                                                                                                                                                                                                                                                           | BP86/LANL2DZ                                                                                                                                                                                                                                                                                                                                                                                                                                                                                                                                                                                                                                                                                                                                                                                                                                                                                                                                                                                                                                                                                                                                                                                                                                     |
|---------------------------------------------------------------------------------------------------------------------------------------------------------------------------------------------------------------------------------------------------------------------------------------------------------------------------------------------------------------------------------------------------------------------------------------------------------------------------------------------------------------------------------------------------------------------------------------------------------------------------------------------------------------------------------------------------------------------------------------------------------------------------------------------------------------------------------------------------------------------------------------------------------------------------------------------------------------------------------------------------------------------------------------------------------------------------------------------------------------------------------------------------------------------------------------------------------------------------------------------------------|----------------------------------------------------------------------------------------------------------------------------------------------------------------------------------------------------------------------------------------------------------------------------------------------------------------------------------------------------------------------------------------------------------------------------------------------------------------------------------------------------------------------------------------------------------------------------------------------------------------------------------------------------------------------------------------------------------------------------------------------------------------------------------------------------------------------------------------------------------------------------------------------------------------------------------------------------------------------------------------------------------------------------------------------------------------------------------------------------------------------------------------------------------------------------------------------------------------------------------------------------------------|----------------------------------------------------------------------------------------------------------------------------------------------------------------------------------------------------------------------------------------------------------------------------------------------------------------------------------------------------------------------------------------------------------------------------------------------------------------------------------------------------------------------------------------------------------------------------------------------------------------------------------------------------------------------------------------------------------------------------------------------------------------------------------------------------------------------------------------------------------------------------------------------------------------------------------------------------------------------------------------------------------------------------------------------------------------------------------------------------------------------------------------------------------------------------------------------------------------------------------------------------|--------------------------------------------------------------------------------------------------------------------------------------------------------------------------------------------------------------------------------------------------------------------------------------------------------------------------------------------------------------------------------------------------------------------------------------------------------------------------------------------------------------------------------------------------------------------------------------------------------------------------------------------------------------------------------------------------------------------------------------------------------------------------------------------------------------------------------------------------------------------------------------------------------------------------------------------------------------------------------------------------------------------------------------------------------------------------------------------------------------------------------------------------------------------------------------------------------------------------------------------------|
| 12(0), 33(1), 36(0), 52(1), 59(0), 62(0), 63(1), 73(0), 78(2), 80(0), 85(1), 90(0), 96(1), 98(0), 103(1), 105(0), 108(1), 109(3), 113(1), 125(2), 128(1), 132(0), 136(3), 143(0), 150(1), 153(2), 167(0), 169(2), 311(19), 319(17), 324(2), 328(6), 337(0), 338(6), 340(6), 347(1), 360(4), 363(4), 368(13), 374(10), 411(15), 421(6), 424(36), 431(2), 440(8), 444(45), 445(31), 451(8), 457(4), 462(18), 463(17), 477(5), 484(29), 498(25), 530(65), 544(42), 553(55), 560(58), 563(13), 567(5), 569(4), 607(0), 611(0), 612(1), 613(0), 618(0), 622(1), 811(45), 813(43), 821(30), 827(114), 833(9), 837(0), 842(10), 842(6), 844(2), 845(2), 847(4), 848(2), 850(7), 855(43), 876(56), 898(2), 909(0), 910(3), 928(1), 932(9), 944(1), 985(2), 1025(9), 1026(5), 1030(11), 1032(5), 1033(4), 1077(9), 1077(1), 1083(1), 1085(2), 1086(1), 1086(1), 1140(2), 1142(3), 1147(1), 1264(0), 1277(0), 1280(0), 1400(1), 1413(1), 1422(4), 1423(0), 1425(2), 1427(2), 1458(4), 1468(1), 1473(4), 1474(4), 1474(4), 1479(4), 1932(134), 1961(114), 1988(37), 1998(887), 2019(894), 2030(1862), 2058(1693), 2092(418), 3055(1), 3273(0), 3280(0), 3283(0), 3283(0), 3286(0), 3291(0), 3292(1), 3295(1), 3295(1), 3298(0), 3300(1), 3305(0), 3312(0), 3313(0) | 19(0), 31(0), 38(1), 49(1), 60(0), 61(1), 63(1), 73(0), 78(0), 80(2), 85(1), 88(0), 96(1), 97(0), 101(1), 103(0), 109(1), 111(2), 113(3), 124(1), 129(0), 133(0), 137(2), 144(0), 151(1), 153(2), 167(0), 173(4), 298(20), 312(21), 318(3), 323(7), 331(2), 333(4), 335(5), 343(1), 354(5), 358(3), 362(10), 374(10), 406(15), 414(3), 419(27), 422(10), 436(13), 439(12), 442(58), 448(12), 451(2), 459(22), 462(17), 474(9), 482(26), 496(30), 527(67), 543(20), 547(96), 559(4), 562(19), 563(47), 568(4), 601(0), 606(0), 607(0), 608(1), 612(0), 619(1), 800(40), 803(34), 811(39), 820(95), 826(10), 827(16), 832(6), 837(26), 838(10), 841(17), 843(1), 844(1), 845(1), 846(26), 872(57), 887(2), 895(0), 898(3), 915(3), 927(7), 932(12), 981(3), 1024(8), 1025(5), 1028(12), 1031(3), 1033(6), 1075(7), 1076(4), 1083(1), 1084(2), 1084(2), 1085(1), 1140(1), 1142(1), 1147(0), 1261(0), 1275(0), 1280(0), 1399(1), 1414(1), 1422(4), 1423(1), 1427(2), 1427(2), 1457(4), 1467(1), 1472(7), 1473(4), 1474(2), 1480(4), 1911(222), 1963(120), 1993(43), 1997(945), 2024(841), 2037(1639), 2067(1644), 2097(445), 3053(0), 3273(0), 3282(0), 3283(0), 3285(0), 3287(0), 3292(0), 3294(1), 3298(1), 3298(2), 3300(1), 3302(1), 3307(0), 3312(0), 3315(0) | 34(0), 38(1), 42(0), 48(1), 52(0), 56(0), 63(1), 70(1), 73(0), 78(1), 81(0), 86(0), 90(0), 93(0), 98(1), 99(2), 101(0), 104(0), 111(0), 114(2), 124(1), 129(0), 136(2), 140(1), 141(0), 151(1), 162(1), 210(6), 280(7), 295(45), 305(1), 306(9), 313(2), 315(3), 324(6), 326(3), 336(7), 339(9), 347(3), 359(5), 372(13), 390(4), 406(11), 407(10), 413(6), 422(32), 427(31), 436(9), 440(14), 441(11), 446(11), 457(11), 469(10), 478(59), 490(23), 511(31), 520(16), 528(3), 530(6), 536(24), 539(130), 575(0), 580(1), 581(1), 582(0), 584(0), 589(2), 776(18), 779(47), 781(56), 792(46), 793(59), 795(3), 801(21), 809(17), 810(7), 812(1), 813(1), 813(40), 814(1), 817(3), 826(31), 852(1), 862(1), 862(2), 877(5), 884(2), 896(3), 947(2), 984(5), 987(7), 988(12), 989(2), 996(5), 1036(8), 1037(2), 1044(2), 1045(2), 1046(2), 1048(0), 1094(2), 1098(3), 1101(1), 1212(0), 1223(0), 1230(0), 1334(1), 1351(1), 1357(5), 1358(1), 1362(2), 1365(1), 1393(4), 1404(5), 1405(1), 1407(3), 1412(2), 1416(4), 1723(260), 1812(222), 1863(325), 1879(54), 1902(462), 1915(1375), 1937(1904), 1959(365), 2976(1), 3163(0), 3173(0), 3173(0), 3174(0), 3179(0), 3182(0), 3185(0), 3188(1), 3188(0), 3191(0), 3193(1), 3195(1), 3202(0), 3204(0) | 34(1), 35(0), 43(0), 46(1), 48(0), 52(0), 62(1), 71(0), 74(0), 78(1), 80(0), 84(1), 88(0), 91(1), 97(1), 98(2), 100(0), 102(0), 109(0), 113(2), 122(1), 128(1), 136(2), 140(1), 141(0), 149(1), 162(1), 216(5), 272(6), 288(44), 298(1), 300(9), 308(3), 310(3), 318(8), 321(2), 330(7), 332(8), 342(3), 358(3), 365(16), 386(4), 400(4), 403(13), 409(5), 418(31), 425(35), 434(8), 437(7), 438(21), 444(10), 454(13), 467(8), 474(60), 485(26), 508(34), 516(15), 528(3), 529(5), 536(7), 541(155), 569(0), 575(1), 575(1), 575(1), 579(0), 584(2), 765(15), 770(42), 772(54), 783(3), 786(9), 789(105), 792(16), 799(20), 804(47), 808(10), 810(1), 810(0), 812(0), 813(0), 822(36), 841(1), 849(2), 851(1), 869(3), 873(11), 884(3), 949(2), 983(5), 987(8), 987(2), 989(11), 994(5), 1036(9), 1038(1), 1043(2), 1044(3), 1046(0), 1047(1), 1094(2), 1098(2), 1101(1), 1211(0), 1223(0), 1228(0), 1334(1), 1352(1), 1357(2), 1358(4), 1361(2), 1366(1), 1393(4), 1403(6), 1405(2), 1407(3), 1412(3), 1416(4), 1732(250), 1811(226), 1867(323), 1882(49), 1906(473), 1920(1324), 1940(1877), 1962(327), 2983(1), 3164(0), 3174(0), 3175(0), 3175(0), 3181(0), 3183(0), 3188(1), 3191(1), 3191(0), 3193(1), 3195(1), 3198(1), 3205(0), 3207(0) |

Table S35 Harmonic vibrational frequencies( $\text{cm}^{-1}$ ) and IR intensities (KM/Mole) of  $\text{Cp}_3\text{Nb}_3(\text{CO})_7$  7-1

| MPW1PW91/SDD                                                                                                                                                                                                                                                                                                                                                                                                                                                                                                                                                                                                                                                                                                                                                                                                                                                                                                                                                                                                                                                                                                                                                                                                | MPW1PW91/LANL2DZ                                                                                                                                                                                                                                                                                                                                                                                                                                                                                                                                                                                                                                                                                                                                                                                                                                                                                                                                                                                                                                                                                                                                                                                        | BP86/SDD                                                                                                                                                                                                                                                                                                                                                                                                                                                                                                                                                                                                                                                                                                                                                                                                                                                                                                                                                                                                                                                                                                                                                                                          | BP86/LANL2DZ                                                                                                                                                                                                                                                                                                                                                                                                                                                                                                                                                                                                                                                                                                                                                                                                                                                                                                                                                                                                                                                                                                                                                                                 |
|-------------------------------------------------------------------------------------------------------------------------------------------------------------------------------------------------------------------------------------------------------------------------------------------------------------------------------------------------------------------------------------------------------------------------------------------------------------------------------------------------------------------------------------------------------------------------------------------------------------------------------------------------------------------------------------------------------------------------------------------------------------------------------------------------------------------------------------------------------------------------------------------------------------------------------------------------------------------------------------------------------------------------------------------------------------------------------------------------------------------------------------------------------------------------------------------------------------|---------------------------------------------------------------------------------------------------------------------------------------------------------------------------------------------------------------------------------------------------------------------------------------------------------------------------------------------------------------------------------------------------------------------------------------------------------------------------------------------------------------------------------------------------------------------------------------------------------------------------------------------------------------------------------------------------------------------------------------------------------------------------------------------------------------------------------------------------------------------------------------------------------------------------------------------------------------------------------------------------------------------------------------------------------------------------------------------------------------------------------------------------------------------------------------------------------|---------------------------------------------------------------------------------------------------------------------------------------------------------------------------------------------------------------------------------------------------------------------------------------------------------------------------------------------------------------------------------------------------------------------------------------------------------------------------------------------------------------------------------------------------------------------------------------------------------------------------------------------------------------------------------------------------------------------------------------------------------------------------------------------------------------------------------------------------------------------------------------------------------------------------------------------------------------------------------------------------------------------------------------------------------------------------------------------------------------------------------------------------------------------------------------------------|----------------------------------------------------------------------------------------------------------------------------------------------------------------------------------------------------------------------------------------------------------------------------------------------------------------------------------------------------------------------------------------------------------------------------------------------------------------------------------------------------------------------------------------------------------------------------------------------------------------------------------------------------------------------------------------------------------------------------------------------------------------------------------------------------------------------------------------------------------------------------------------------------------------------------------------------------------------------------------------------------------------------------------------------------------------------------------------------------------------------------------------------------------------------------------------------|
| 35(0), 45(0), 61(0), 68(0), 73(0), 77(0), 80(1), 81(0), 88(1), 90(0), 94(1), 102(0), 104(1), 107(0), 109(1), 119(3), 121(1), 126(2), 129(1), 140(1), 150(2), 155(1), 160(0), 174(0), 269(4), 312(1), 314(2), 322(6), 329(2), 330(2), 337(4), 343(4), 353(5), 357(25), 359(3), 387(46), 391(55), 416(15), 426(41), 441(42), 443(12), 451(23), 452(1), 461(5), 468(12), 475(14), 484(10), 496(22), 502(5), 522(27), 523(13), 539(33), 559(38), 564(18), 574(29), 596(21), 611(0), 614(3), 615(0), 616(0), 618(1), 620(5), 816(75), 819(89), 828(70), 832(48), 843(3), 844(21), 846(11), 847(24), 847(2), 848(3), 849(8), 850(0), 851(0), 852(4), 862(41), 909(1), 912(1), 913(2), 927(2), 933(2), 945(1), 1027(5), 1029(6), 1032(5), 1037(7), 1038(6), 1039(12), 1082(3), 1083(1), 1083(2), 1085(4), 1086(3), 1089(1), 1147(1), 1150(0), 1151(0), 1278(0), 1278(0), 1280(0), 1418(2), 1419(3), 1419(2), 1430(2), 1432(4), 1435(3), 1470(3), 1470(2), 1474(3), 1474(3), 1478(1), 1479(2), 1522(110), 1958(53), 1976(213), 2000(1265), 2019(1835), 2035(1196), 2068(317), 3279(0), 3281(0), 3283(0), 3283(0), 3286(0), 3288(0), 3292(0), 3296(1), 3297(0), 3298(0), 3298(1), 3302(0), 3309(0), 3314(0), 3318(0) | 35(0), 44(0), 60(0), 66(0), 71(0), 75(0), 79(0), 81(0), 87(1), 89(0), 93(1), 101(1), 102(0), 106(0), 108(1), 118(4), 121(1), 127(2), 127(1), 138(1), 148(2), 153(1), 159(1), 171(1), 254(4), 301(2), 308(1), 316(7), 322(3), 324(2), 332(3), 337(4), 346(3), 353(23), 355(3), 383(47), 387(55), 410(14), 422(44), 438(42), 438(16), 448(18), 448(1), 458(6), 464(12), 472(18), 480(9), 494(23), 498(6), 520(31), 521(9), 537(37), 557(40), 563(23), 573(29), 592(20), 604(0), 607(4), 610(0), 610(0), 613(0), 614(7), 807(65), 810(49), 817(63), 819(96), 830(6), 832(9), 833(9), 837(54), 843(7), 845(4), 847(0), 847(9), 848(0), 848(0), 852(41), 897(1), 898(2), 898(2), 910(2), 923(3), 933(2), 1027(5), 1029(6), 1031(5), 1037(6), 1037(7), 1038(12), 1081(3), 1082(0), 1083(2), 1084(5), 1086(3), 1088(1), 1147(1), 1150(0), 1151(0), 1277(0), 1279(0), 1280(0), 1418(2), 1419(4), 1419(2), 1429(1), 1432(3), 1435(3), 1470(3), 1470(3), 1473(3), 1475(3), 1478(2), 1479(2), 1541(120), 1963(36), 1979(224), 2006(1268), 2025(1784), 2040(1142), 2071(279), 3280(0), 3282(0), 3284(0), 3284(0), 3287(0), 3289(0), 3294(1), 3298(0), 3298(2), 3299(0), 3299(1), 3303(0), 3310(0), 3316(0), 3320(0) | 33(0), 43(0), 57(0), 65(0), 67(0), 71(0), 76(0), 77(1), 83(1), 86(0), 90(1), 97(0), 99(0), 102(0), 105(1), 112(2), 115(2), 119(2), 122(0), 134(1), 142(2), 146(1), 155(0), 165(1), 251(4), 294(2), 296(4), 304(3), 308(2), 310(3), 315(3), 322(4), 329(5), 335(13), 340(6), 368(28), 369(48), 396(13), 405(31), 420(11), 424(42), 430(1), 433(20), 443(6), 449(5), 454(23), 465(8), 473(12), 481(7), 492(14), 498(21), 508(21), 529(27), 534(12), 544(21), 560(21), 578(0), 581(2), 583(0), 583(0), 585(1), 588(3), 778(67), 781(62), 787(59), 793(71), 801(6), 803(15), 804(10), 806(37), 812(25), 813(5), 815(7), 816(0), 817(0), 818(0), 820(18), 862(1), 864(1), 864(1), 878(2), 884(1), 893(1), 986(5), 989(5), 992(5), 996(7), 997(5), 998(13), 1043(3), 1043(1), 1044(3), 1045(5), 1046(2), 1049(2), 1100(2), 1103(0), 1105(1), 1225(0), 1226(0), 1228(0), 1353(1), 1354(1), 1355(4), 1365(2), 1367(3), 1371(2), 1405(2), 1406(2), 1409(3), 1410(2), 1414(1), 1414(2), 1433(81), 1843(85), 1858(182), 1880(1013), 1898(1436), 1911(1040), 1940(292), 3171(0), 3173(0), 3175(0), 3175(0), 3178(0), 3180(0), 3184(0), 3188(0), 3188(0), 3189(0), 3189(0), 3193(0), 3200(0), 3205(0), 3208(0) | 32(0), 42(0), 56(0), 63(0), 65(0), 68(0), 75(0), 77(0), 81(0), 84(0), 88(1), 96(0), 96(0), 100(0), 103(1), 111(3), 114(1), 119(2), 120(0), 132(0), 140(2), 144(1), 155(0), 163(1), 237(4), 288(2), 289(4), 294(3), 300(3), 303(2), 310(2), 315(5), 322(4), 331(13), 334(3), 364(32), 367(44), 390(11), 400(35), 415(8), 421(41), 427(3), 431(23), 440(8), 445(5), 451(26), 463(8), 470(13), 478(7), 491(11), 496(24), 506(23), 528(29), 534(16), 543(21), 557(19), 571(0), 575(2), 577(0), 578(0), 580(0), 582(3), 768(35), 773(54), 778(52), 782(107), 787(4), 790(8), 791(9), 798(64), 806(55), 810(2), 812(0), 814(0), 815(0), 815(4), 816(0), 850(3), 851(1), 851(1), 861(1), 875(2), 881(1), 986(5), 988(5), 991(5), 996(7), 997(6), 997(12), 1042(0), 1042(3), 1043(3), 1045(4), 1046(2), 1048(1), 1100(1), 1103(0), 1104(0), 1224(0), 1226(0), 1227(0), 1353(1), 1354(1), 1355(4), 1364(1), 1367(3), 1370(2), 1405(3), 1405(2), 1409(3), 1410(3), 1414(2), 1415(1), 1451(86), 1846(91), 1862(166), 1884(996), 1902(1419), 1915(977), 1943(264), 3172(0), 3174(0), 3176(0), 3176(0), 3179(0), 3181(0), 3186(0), 3190(0), 3190(1), 3191(0), 3191(0), 3195(0), 3202(0), 3207(0), 3211(0) |

Table S36 Harmonic vibrational frequencies( $\text{cm}^{-1}$ ) and IR intensities (KM/Mole) of  $\text{Cp}_3\text{Nb}_3(\text{CO})_7$  7-2

| MPW1PW91/SDD                                                                                                                                                                                                                                                                                                                                                                                                                                                                                                                                                                                                                                                                                                                                                                                                                                                                                                                                                                                                                                                                                                                                                                                        | MPW1PW91/LANL2DZ                                                                                                                                                                                                                                                                                                                                                                                                                                                                                                                                                                                                                                                                                                                                                                                                                                                                                                                                                                                                                                                                                                                                                                                    | BP86/SDD                                                                                                                                                                                                                                                                                                                                                                                                                                                                                                                                                                                                                                                                                                                                                                                                                                                                                                                                                                                                                                                                                                                                                                                     | BP86/LANL2DZ                                                                                                                                                                                                                                                                                                                                                                                                                                                                                                                                                                                                                                                                                                                                                                                                                                                                                                                                                                                                                                                                                                                                                                              |
|-----------------------------------------------------------------------------------------------------------------------------------------------------------------------------------------------------------------------------------------------------------------------------------------------------------------------------------------------------------------------------------------------------------------------------------------------------------------------------------------------------------------------------------------------------------------------------------------------------------------------------------------------------------------------------------------------------------------------------------------------------------------------------------------------------------------------------------------------------------------------------------------------------------------------------------------------------------------------------------------------------------------------------------------------------------------------------------------------------------------------------------------------------------------------------------------------------|-----------------------------------------------------------------------------------------------------------------------------------------------------------------------------------------------------------------------------------------------------------------------------------------------------------------------------------------------------------------------------------------------------------------------------------------------------------------------------------------------------------------------------------------------------------------------------------------------------------------------------------------------------------------------------------------------------------------------------------------------------------------------------------------------------------------------------------------------------------------------------------------------------------------------------------------------------------------------------------------------------------------------------------------------------------------------------------------------------------------------------------------------------------------------------------------------------|----------------------------------------------------------------------------------------------------------------------------------------------------------------------------------------------------------------------------------------------------------------------------------------------------------------------------------------------------------------------------------------------------------------------------------------------------------------------------------------------------------------------------------------------------------------------------------------------------------------------------------------------------------------------------------------------------------------------------------------------------------------------------------------------------------------------------------------------------------------------------------------------------------------------------------------------------------------------------------------------------------------------------------------------------------------------------------------------------------------------------------------------------------------------------------------------|-------------------------------------------------------------------------------------------------------------------------------------------------------------------------------------------------------------------------------------------------------------------------------------------------------------------------------------------------------------------------------------------------------------------------------------------------------------------------------------------------------------------------------------------------------------------------------------------------------------------------------------------------------------------------------------------------------------------------------------------------------------------------------------------------------------------------------------------------------------------------------------------------------------------------------------------------------------------------------------------------------------------------------------------------------------------------------------------------------------------------------------------------------------------------------------------|
| 34(0), 43(0), 52(0), 55(0), 58(0), 66(0), 74(0), 79(1), 80(0), 87(1), 92(0), 94(0), 98(3), 103(1), 108(0), 110(1), 112(0), 117(1), 124(1), 135(2), 145(0), 149(0), 156(0), 164(0), 302(2), 313(5), 315(0), 317(10), 322(2), 326(1), 336(11), 339(2), 346(5), 357(2), 370(26), 390(56), 398(4), 420(5), 423(85), 434(9), 445(77), 447(1), 457(4), 463(4), 471(5), 473(2), 481(8), 490(7), 502(23), 522(6), 531(18), 537(48), 558(9), 561(15), 577(22), 599(8), 611(0), 611(1), 612(1), 614(1), 615(0), 620(7), 784(53), 807(98), 818(37), 821(10), 823(106), 827(33), 835(27), 844(5), 845(0), 846(2), 849(1), 849(6), 850(0), 851(1), 856(30), 890(1), 895(0), 911(1), 919(0), 920(0), 936(0), 1025(11), 1030(6), 1033(5), 1035(9), 1036(7), 1038(7), 1077(1), 1082(1), 1083(3), 1084(1), 1086(2), 1087(1), 1148(0), 1150(3), 1151(1), 1277(0), 1279(0), 1280(0), 1418(4), 1420(1), 1421(4), 1425(29), 1430(3), 1435(2), 1436(31), 1469(3), 1470(2), 1474(3), 1480(2), 1480(2), 1481(3), 1978(316), 1995(134), 2020(252), 2040(1337), 2047(1610), 2097(1204), 3276(0), 3280(0), 3280(0), 3283(0), 3284(0), 3285(0), 3293(0), 3294(1), 3294(0), 3296(0), 3299(0), 3300(0), 3306(1), 3310(1), 3317(0) | 34(0), 43(0), 54(0), 55(0), 58(0), 66(0), 74(0), 78(1), 79(0), 85(1), 91(0), 92(0), 97(3), 103(1), 107(0), 109(1), 112(0), 117(1), 124(1), 135(2), 143(0), 148(0), 154(0), 163(0), 293(3), 307(5), 310(1), 311(7), 316(3), 321(2), 330(11), 332(1), 340(4), 354(3), 363(24), 388(56), 392(5), 415(5), 419(87), 429(8), 441(73), 444(7), 453(2), 460(7), 467(6), 470(2), 479(11), 488(6), 499(26), 520(9), 528(22), 535(48), 557(2), 559(23), 578(23), 595(6), 605(0), 606(0), 607(0), 608(3), 611(1), 616(8), 770(38), 793(49), 807(33), 809(30), 814(116), 818(64), 819(43), 827(7), 840(33), 842(0), 844(2), 846(0), 847(0), 848(5), 848(1), 875(0), 881(1), 894(0), 895(1), 907(0), 920(0), 1025(12), 1030(6), 1032(6), 1035(9), 1036(7), 1038(7), 1077(1), 1082(1), 1082(3), 1083(1), 1086(2), 1086(1), 1148(0), 1150(2), 1151(0), 1276(0), 1279(0), 1280(0), 1418(3), 1421(1), 1421(2), 1427(10), 1430(2), 1433(2), 1446(59), 1469(3), 1470(2), 1473(4), 1479(2), 1480(3), 1481(3), 1984(321), 2001(129), 2026(245), 2045(1286), 2051(1557), 2101(1190), 3278(0), 3280(0), 3282(0), 3283(0), 3286(0), 3286(0), 3294(0), 3295(1), 3296(0), 3297(0), 3300(0), 3301(0), 3308(1), 3313(1), 3317(0) | 31(0), 38(0), 47(0), 50(0), 53(0), 59(0), 69(0), 74(1), 76(0), 81(0), 86(0), 88(0), 93(1), 98(1), 102(0), 105(1), 105(1), 116(2), 120(0), 128(1), 137(0), 142(0), 146(0), 156(0), 285(1), 290(4), 295(1), 299(5), 302(3), 307(2), 314(4), 317(5), 327(5), 336(1), 356(23), 374(43), 377(4), 398(2), 406(69), 411(6), 422(34), 428(24), 436(1), 442(6), 449(11), 456(3), 458(7), 468(3), 476(12), 494(12), 504(43), 507(14), 528(8), 532(12), 548(15), 563(7), 578(0), 580(0), 580(0), 583(3), 584(1), 587(4), 744(33), 765(67), 778(58), 780(107), 781(13), 785(39), 792(33), 795(11), 806(22), 811(0), 813(0), 815(0), 816(0), 817(2), 818(1), 843(0), 846(1), 861(1), 868(0), 870(0), 879(1), 983(12), 988(3), 991(6), 994(8), 994(6), 998(8), 1038(2), 1042(2), 1042(2), 1044(1), 1047(1), 1048(1), 1101(1), 1103(3), 1104(1), 1223(0), 1227(0), 1227(0), 1346(43), 1353(1), 1355(2), 1356(4), 1365(1), 1366(2), 1369(3), 1404(3), 1406(2), 1409(3), 1414(1), 1415(4), 1415(1), 1862(249), 1877(97), 1901(258), 1917(1009), 1923(1390), 1970(1010), 3167(0), 3170(0), 3172(0), 3175(0), 3176(0), 3177(0), 3183(0), 3185(0), 3185(0), 3188(0), 3190(0), 3191(0), 3197(1), 3199(1), 3206(0) | 28(0), 37(0), 45(0), 49(0), 52(0), 59(0), 67(0), 71(1), 77(0), 78(1), 84(0), 86(0), 91(1), 97(2), 99(0), 104(1), 104(0), 114(2), 118(0), 125(1), 134(0), 141(0), 145(0), 155(0), 275(2), 283(4), 289(1), 292(3), 294(5), 301(3), 307(3), 311(5), 321(4), 333(1), 346(20), 370(45), 372(4), 394(1), 402(72), 407(6), 417(36), 425(21), 432(1), 439(8), 447(15), 454(2), 456(10), 466(3), 474(13), 492(16), 503(38), 505(19), 528(6), 531(16), 548(16), 560(6), 572(0), 573(0), 575(0), 577(3), 578(2), 583(4), 730(20), 751(44), 768(4), 769(51), 771(71), 776(83), 779(80), 783(18), 793(28), 807(0), 811(0), 811(0), 812(0), 814(0), 815(1), 829(1), 834(1), 847(1), 848(0), 857(0), 864(0), 982(12), 987(3), 990(6), 994(7), 995(8), 998(9), 1038(2), 1041(1), 1042(3), 1044(1), 1046(1), 1048(1), 1101(1), 1104(1), 1104(2), 1223(0), 1226(0), 1226(0), 1354(4), 1354(5), 1356(2), 1359(24), 1365(2), 1368(1), 1369(22), 1403(4), 1406(2), 1408(3), 1414(2), 1415(5), 1415(1), 1867(247), 1881(97), 1906(249), 1921(973), 1926(1340), 1973(985), 3169(0), 3172(0), 3174(0), 3175(0), 3178(0), 3178(0), 3186(0), 3187(0), 3187(0), 3189(0), 3191(0), 3193(0), 3200(1), 3201(1), 3208(0) |

Table S37 Harmonic vibrational frequencies( $\text{cm}^{-1}$ ) and IR intensities (KM/Mole) of  $\text{Cp}_3\text{Nb}_3(\text{CO})_7$  7-3

| MPW1PW91/SDD                                                                                                                                                                                                                                                                                                                                                                                                                                                                                                                                                                                                                                                                                                                                                                                                                                                                                                                                                                                                                                                                                                                                                                                         | MPW1PW91/LANL2DZ                                                                                                                                                                                                                                                                                                                                                                                                                                                                                                                                                                                                                                                                                                                                                                                                                                                                                                                                                                                                                                                                                                                                                                                     | BP86/SDD                                                                                                                                                                                                                                                                                                                                                                                                                                                                                                                                                                                                                                                                                                                                                                                                                                                                                                                                                                                                                                                                                                                                                                                    | BP86/LANL2DZ                                                                                                                                                                                                                                                                                                                                                                                                                                                                                                                                                                                                                                                                                                                                                                                                                                                                                                                                                                                                                                                                                                                                                                                 |
|------------------------------------------------------------------------------------------------------------------------------------------------------------------------------------------------------------------------------------------------------------------------------------------------------------------------------------------------------------------------------------------------------------------------------------------------------------------------------------------------------------------------------------------------------------------------------------------------------------------------------------------------------------------------------------------------------------------------------------------------------------------------------------------------------------------------------------------------------------------------------------------------------------------------------------------------------------------------------------------------------------------------------------------------------------------------------------------------------------------------------------------------------------------------------------------------------|------------------------------------------------------------------------------------------------------------------------------------------------------------------------------------------------------------------------------------------------------------------------------------------------------------------------------------------------------------------------------------------------------------------------------------------------------------------------------------------------------------------------------------------------------------------------------------------------------------------------------------------------------------------------------------------------------------------------------------------------------------------------------------------------------------------------------------------------------------------------------------------------------------------------------------------------------------------------------------------------------------------------------------------------------------------------------------------------------------------------------------------------------------------------------------------------------|---------------------------------------------------------------------------------------------------------------------------------------------------------------------------------------------------------------------------------------------------------------------------------------------------------------------------------------------------------------------------------------------------------------------------------------------------------------------------------------------------------------------------------------------------------------------------------------------------------------------------------------------------------------------------------------------------------------------------------------------------------------------------------------------------------------------------------------------------------------------------------------------------------------------------------------------------------------------------------------------------------------------------------------------------------------------------------------------------------------------------------------------------------------------------------------------|----------------------------------------------------------------------------------------------------------------------------------------------------------------------------------------------------------------------------------------------------------------------------------------------------------------------------------------------------------------------------------------------------------------------------------------------------------------------------------------------------------------------------------------------------------------------------------------------------------------------------------------------------------------------------------------------------------------------------------------------------------------------------------------------------------------------------------------------------------------------------------------------------------------------------------------------------------------------------------------------------------------------------------------------------------------------------------------------------------------------------------------------------------------------------------------------|
| -52(2), -52(2), 57(1), 57(1), 59(1), 80(1), 80(1), 80(0), 84(0), 86(1), 86(1), 94(0), 108(0), 108(0), 113(0), 113(0), 120(0), 134(0), 134(0), 136(0), 159(0), 163(4), 163(4), 180(0), 180(0), 184(0), 217(3), 217(3), 302(0), 318(2), 318(2), 319(6), 327(3), 331(1), 331(1), 343(13), 343(13), 349(1), 413(45), 419(27), 419(27), 429(55), 429(55), 437(1), 450(24), 450(24), 455(7), 505(6), 505(6), 506(0), 514(1), 517(23), 517(23), 573(0), 579(11), 579(11), 610(1), 611(2), 611(2), 618(2), 618(2), 618(0), 828(184), 828(184), 829(6), 839(20), 839(20), 840(1), 846(2), 847(12), 847(12), 849(0), 849(2), 849(2), 852(9), 852(5), 852(5), 915(0), 915(0), 915(0), 934(0), 934(2), 934(2), 1032(9), 1032(9), 1032(0), 1038(0), 1038(0), 1038(17), 1080(1), 1081(0), 1081(0), 1086(2), 1086(2), 1086(2), 1154(0), 1154(0), 1154(0), 1278(0), 1278(0), 1278(0), 1425(6), 1425(7), 1425(7), 1430(0), 1431(6), 1431(6), 1472(1), 1472(1), 1472(0), 1481(8), 1481(1), 1481(1), 1834(335), 1957(28), 1957(28), 1990(2121), 2007(1441), 2007(1441), 2050(62), 3280(0), 3280(0), 3280(0), 3286(0), 3286(0), 3286(0), 3296(1), 3296(1), 3296(1), 3297(1), 3297(0), 3297(0), 3309(0), 3309(0), 3309(0) | -53(2), -53(2), 58(1), 58(1), 59(1), 79(1), 79(1), 80(0), 82(1), 85(1), 85(1), 93(0), 106(0), 106(0), 111(0), 111(0), 119(0), 132(0), 132(0), 136(0), 157(0), 161(4), 161(4), 177(0), 177(0), 182(0), 215(3), 215(3), 296(0), 312(2), 312(2), 314(6), 321(3), 325(1), 325(1), 340(13), 340(13), 346(1), 409(42), 416(23), 416(23), 425(54), 425(54), 433(2), 447(30), 447(30), 453(8), 502(5), 502(5), 505(0), 510(1), 515(27), 515(27), 573(0), 579(12), 579(12), 604(1), 606(3), 606(3), 614(2), 614(2), 614(0), 822(175), 822(175), 823(9), 828(30), 828(30), 829(1), 839(9), 840(18), 840(18), 846(1), 846(3), 846(3), 846(1), 847(0), 847(0), 904(0), 904(0), 905(0), 921(0), 922(2), 922(2), 1031(9), 1031(9), 1032(0), 1037(0), 1037(0), 1038(19), 1079(2), 1080(0), 1080(0), 1085(2), 1085(2), 1085(2), 1154(0), 1154(0), 1154(0), 1277(0), 1277(0), 1277(0), 1425(5), 1425(8), 1425(8), 1430(0), 1431(5), 1431(5), 1473(2), 1473(2), 1473(0), 1481(1), 1481(1), 1481(9), 1854(332), 1963(38), 1963(38), 1995(2084), 2014(1388), 2014(1388), 2054(43), 3281(0), 3281(0), 3281(0), 3286(0), 3286(0), 3286(0), 3297(1), 3297(1), 3297(1), 3299(3), 3299(0), 3299(0), 3310(0), 3310(0), 3311(0) | -19(0), -19(0), 55(1), 55(1), 55(1), 72(1), 73(0), 73(0), 80(0), 87(1), 87(1), 88(0), 102(0), 102(0), 109(0), 109(0), 112(0), 127(0), 128(0), 128(0), 150(0), 159(2), 159(2), 174(0), 181(0), 181(0), 219(2), 219(2), 289(0), 296(2), 296(2), 299(11), 303(0), 305(2), 305(2), 320(8), 320(8), 329(0), 398(27), 399(41), 399(41), 406(20), 406(20), 409(0), 434(28), 434(28), 436(4), 477(0), 482(4), 482(4), 491(0), 494(12), 494(12), 539(0), 549(7), 549(7), 578(1), 579(2), 579(2), 586(0), 586(2), 586(2), 787(161), 787(161), 788(8), 794(26), 794(26), 795(0), 807(8), 808(24), 808(24), 815(0), 816(2), 816(2), 816(1), 817(0), 817(0), 865(0), 865(0), 866(0), 883(0), 883(2), 883(2), 992(8), 992(8), 992(0), 997(0), 997(0), 997(17), 1040(2), 1041(0), 1041(0), 1046(1), 1046(1), 1046(2), 1108(0), 1108(0), 1108(0), 1226(0), 1226(0), 1226(0), 1359(4), 1360(7), 1360(7), 1366(0), 1367(4), 1367(4), 1409(2), 1409(2), 1409(0), 1416(1), 1416(1), 1416(7), 1695(211), 1843(22), 1843(22), 1871(1668), 1889(1160), 1889(1160), 1924(36), 3172(0), 3172(0), 3172(1), 3177(0), 3177(0), 3177(0), 3187(0), 3187(0), 3187(0), 3188(0), 3188(0), 3188(0), 3200(0), 3200(0), 3200(0) | -23(0), -23(0), 55(1), 55(1), 55(1), 72(1), 73(0), 73(0), 78(0), 85(1), 85(1), 87(0), 100(0), 100(0), 108(0), 108(0), 111(0), 126(0), 126(0), 127(0), 147(0), 157(2), 157(2), 171(0), 179(0), 179(0), 216(2), 216(2), 283(0), 290(2), 290(2), 293(11), 297(0), 298(2), 298(2), 316(8), 316(8), 326(0), 394(26), 397(43), 397(43), 403(16), 403(16), 406(1), 432(32), 432(32), 434(5), 475(0), 480(4), 480(4), 488(1), 492(13), 492(13), 540(0), 549(8), 549(8), 572(0), 574(2), 574(2), 581(0), 581(2), 581(2), 781(130), 781(130), 781(11), 783(44), 783(44), 785(1), 797(7), 797(40), 797(40), 813(0), 814(2), 814(2), 814(1), 814(0), 814(0), 854(0), 854(0), 855(0), 870(0), 871(2), 871(2), 991(8), 991(8), 992(0), 996(0), 996(0), 996(18), 1040(2), 1040(0), 1040(0), 1045(1), 1045(1), 1045(2), 1108(0), 1108(0), 1108(0), 1225(0), 1225(0), 1225(0), 1359(4), 1360(8), 1360(8), 1366(0), 1366(4), 1366(4), 1409(2), 1409(2), 1409(0), 1416(1), 1416(1), 1416(8), 1711(206), 1848(24), 1848(24), 1876(1626), 1893(1121), 1893(1121), 1927(28), 3172(1), 3172(0), 3172(0), 3178(0), 3178(0), 3178(0), 3189(0), 3189(0), 3189(0), 3190(1), 3190(0), 3190(0), 3202(0), 3202(0), 3202(0) |

Table S38 Harmonic vibrational frequencies( $\text{cm}^{-1}$ ) and IR intensities (KM/Mole) of  $\text{Cp}_3\text{Nb}_3(\text{CO})_6$  6-1

| MPW1PW91/SDD                                                                                                                                                                                                                                                                                                                                                                                                                                                                                                                                                                                                                                                                                                                                                                                                                                                                                                                                                                                                                                                                                                                                        | MPW1PW91/LANL2DZ                                                                                                                                                                                                                                                                                                                                                                                                                                                                                                                                                                                                                                                                                                                                                                                                                                                                                                                                                                                                                                                                                                                                   | BP86/SDD                                                                                                                                                                                                                                                                                                                                                                                                                                                                                                                                                                                                                                                                                                                                                                                                                                                                                                                                                                                                                                                                                                                                | BP86/LANL2DZ                                                                                                                                                                                                                                                                                                                                                                                                                                                                                                                                                                                                                                                                                                                                                                                                                                                                                                                                                                                                                                                                                                                            |
|-----------------------------------------------------------------------------------------------------------------------------------------------------------------------------------------------------------------------------------------------------------------------------------------------------------------------------------------------------------------------------------------------------------------------------------------------------------------------------------------------------------------------------------------------------------------------------------------------------------------------------------------------------------------------------------------------------------------------------------------------------------------------------------------------------------------------------------------------------------------------------------------------------------------------------------------------------------------------------------------------------------------------------------------------------------------------------------------------------------------------------------------------------|----------------------------------------------------------------------------------------------------------------------------------------------------------------------------------------------------------------------------------------------------------------------------------------------------------------------------------------------------------------------------------------------------------------------------------------------------------------------------------------------------------------------------------------------------------------------------------------------------------------------------------------------------------------------------------------------------------------------------------------------------------------------------------------------------------------------------------------------------------------------------------------------------------------------------------------------------------------------------------------------------------------------------------------------------------------------------------------------------------------------------------------------------|-----------------------------------------------------------------------------------------------------------------------------------------------------------------------------------------------------------------------------------------------------------------------------------------------------------------------------------------------------------------------------------------------------------------------------------------------------------------------------------------------------------------------------------------------------------------------------------------------------------------------------------------------------------------------------------------------------------------------------------------------------------------------------------------------------------------------------------------------------------------------------------------------------------------------------------------------------------------------------------------------------------------------------------------------------------------------------------------------------------------------------------------|-----------------------------------------------------------------------------------------------------------------------------------------------------------------------------------------------------------------------------------------------------------------------------------------------------------------------------------------------------------------------------------------------------------------------------------------------------------------------------------------------------------------------------------------------------------------------------------------------------------------------------------------------------------------------------------------------------------------------------------------------------------------------------------------------------------------------------------------------------------------------------------------------------------------------------------------------------------------------------------------------------------------------------------------------------------------------------------------------------------------------------------------|
| 27(0), 34(0), 41(0), 48(0), 53(0), 61(1), 72(1), 82(0), 85(0), 91(1), 93(0), 99(0), 103(0), 108(0), 122(1), 129(2), 135(0), 140(1), 147(0), 172(0), 182(1), 193(1), 208(0), 263(3), 308(15), 313(2), 319(2), 327(3), 328(3), 330(1), 340(14), 343(14), 359(2), 368(1), 372(3), 409(26), 411(3), 426(65), 431(13), 439(19), 444(2), 463(26), 465(14), 486(3), 497(23), 529(10), 535(24), 543(1), 554(11), 561(26), 573(69), 611(0), 613(0), 614(0), 615(4), 616(0), 618(0), 823(203), 824(133), 826(38), 834(11), 839(29), 842(31), 846(7), 847(13), 849(1), 849(3), 850(3), 850(2), 850(4), 852(2), 853(3), 918(1), 918(1), 920(2), 926(0), 928(3), 929(1), 1029(7), 1031(7), 1034(5), 1038(7), 1039(11), 1041(6), 1080(1), 1081(1), 1082(1), 1084(1), 1085(1), 1087(0), 1154(1), 1154(0), 1154(0), 1277(0), 1277(0), 1279(0), 1422(1), 1424(2), 1429(2), 1430(2), 1431(0), 1432(1), 1471(4), 1471(1), 1474(3), 1478(2), 1480(3), 1481(3), 1809(897), 1880(195), 1891(935), 1928(1195), 1961(602), 2082(863), 3276(0), 3278(0), 3279(0), 3280(0), 3281(0), 3284(0), 3291(0), 3291(1), 3293(0), 3293(1), 3296(1), 3298(1), 3303(0), 3304(0), 3305(1) | 25(0), 31(0), 36(0), 46(1), 51(0), 60(1), 71(0), 80(0), 84(0), 88(2), 92(0), 97(0), 101(0), 107(0), 120(1), 128(2), 133(0), 139(1), 145(0), 170(0), 178(1), 192(0), 204(0), 261(3), 299(16), 305(2), 312(2), 319(4), 321(3), 322(1), 334(14), 338(15), 353(2), 364(1), 367(4), 405(27), 408(5), 423(53), 427(19), 434(23), 439(4), 460(8), 461(32), 482(3), 492(25), 526(9), 533(21), 540(2), 552(13), 562(37), 571(69), 605(0), 607(1), 607(0), 609(5), 609(1), 612(0), 808(108), 810(63), 813(29), 816(90), 823(78), 826(15), 827(30), 830(31), 837(33), 846(1), 846(2), 847(0), 848(2), 849(0), 849(0), 897(4), 898(1), 899(1), 902(0), 907(2), 915(3), 1028(7), 1031(7), 1033(6), 1037(8), 1038(5), 1038(12), 1078(1), 1080(1), 1081(1), 1083(0), 1083(1), 1085(0), 1153(0), 1153(0), 1154(0), 1276(0), 1277(0), 1279(0), 1422(1), 1423(2), 1429(2), 1430(1), 1430(1), 1432(0), 1471(4), 1472(1), 1474(4), 1478(2), 1479(3), 1482(3), 1824(876), 1894(146), 1905(951), 1938(1189), 1971(584), 2087(837), 3276(0), 3279(0), 3280(0), 3281(0), 3281(0), 3285(0), 3292(0), 3293(1), 3295(0), 3295(2), 3299(1), 3300(2), 3305(0), 3307(0), 3308(1) | 15(0), 28(0), 37(0), 42(1), 46(0), 59(1), 70(0), 76(0), 82(0), 87(1), 89(0), 96(0), 98(0), 103(0), 115(1), 123(2), 131(0), 135(0), 142(0), 161(0), 172(1), 184(1), 208(1), 247(4), 283(8), 290(2), 296(4), 302(1), 303(4), 306(1), 318(11), 320(8), 336(3), 343(1), 346(0), 386(6), 394(10), 402(48), 416(10), 417(9), 429(12), 443(2), 448(21), 461(3), 471(20), 500(3), 506(2), 510(14), 521(10), 530(13), 541(49), 579(1), 580(1), 581(1), 581(1), 582(0), 585(0), 782(137), 783(89), 787(71), 794(19), 796(10), 799(50), 804(7), 805(20), 809(43), 816(1), 816(0), 817(0), 817(1), 819(1), 820(1), 864(0), 868(1), 872(2), 875(0), 880(2), 881(2), 990(7), 992(7), 993(4), 997(8), 998(6), 999(10), 1040(1), 1042(1), 1043(1), 1045(0), 1045(1), 1048(0), 1107(0), 1108(1), 1108(0), 1225(0), 1225(0), 1226(0), 1358(2), 1359(1), 1365(3), 1367(0), 1367(0), 1368(0), 1408(4), 1408(1), 1409(3), 1415(2), 1415(3), 1416(3), 1709(666), 1760(385), 1784(485), 1810(802), 1840(556), 1947(710), 3166(0), 3170(0), 3170(0), 3171(0), 3172(0), 3174(0), 3181(0), 3182(0), 3184(0), 3184(1), 3186(0), 3188(0), 3194(0), 3195(0), 3195(0) | 20(0), 27(0), 35(0), 38(1), 46(0), 58(1), 69(0), 74(0), 80(0), 85(1), 88(0), 95(0), 96(0), 101(0), 113(0), 121(2), 128(0), 133(0), 139(0), 160(0), 169(1), 182(0), 203(1), 245(4), 274(9), 281(2), 289(4), 294(1), 296(4), 299(1), 312(10), 315(8), 333(3), 338(0), 342(0), 383(6), 391(12), 398(46), 411(6), 413(13), 426(13), 440(3), 446(20), 458(3), 467(22), 498(3), 504(1), 508(11), 521(10), 530(19), 540(50), 573(0), 573(2), 574(1), 575(0), 576(1), 580(0), 767(74), 768(49), 774(38), 779(14), 782(57), 785(49), 787(30), 790(71), 797(64), 813(1), 814(0), 814(0), 815(2), 816(0), 816(0), 844(1), 850(1), 853(2), 856(0), 859(3), 868(2), 989(7), 992(7), 992(5), 996(9), 997(5), 998(10), 1040(1), 1041(1), 1042(1), 1044(0), 1045(1), 1047(0), 1106(0), 1107(1), 1108(0), 1223(0), 1225(0), 1225(0), 1358(1), 1358(2), 1365(3), 1366(1), 1367(0), 1367(0), 1408(4), 1409(1), 1409(3), 1414(2), 1415(3), 1416(3), 1723(643), 1773(360), 1796(484), 1819(778), 1850(548), 1951(684), 3167(0), 3171(0), 3171(0), 3172(0), 3173(0), 3176(0), 3183(0), 3185(0), 3186(0), 3187(1), 3189(0), 3191(1), 3196(0), 3198(0), 3198(1) |

Table S39 Harmonic vibrational frequencies( $\text{cm}^{-1}$ ) and IR intensities (KM/Mole) of  $\text{Cp}_3\text{Nb}_3(\text{CO})_6$  6-2

| MPW1PW91/SDD                                                                                                                                                                                                                                                                                                                                                                                                                                                                                                                                                                                                                                                                                                                                                                                                                                                                                                                                                                                                                                                                                                                                          | MPW1PW91/LANL2DZ                                                                                                                                                                                                                                                                                                                                                                                                                                                                                                                                                                                                                                                                                                                                                                                                                                                                                                                                                                                                                                                                                                                                       | BP86/SDD                                                                                                                                                                                                                                                                                                                                                                                                                                                                                                                                                                                                                                                                                                                                                                                                                                                                                                                                                                                                                                                                                                                                         | BP86/LANL2DZ                                                                                                                                                                                                                                                                                                                                                                                                                                                                                                                                                                                                                                                                                                                                                                                                                                                                                                                                                                                                                                                                                                                                     |
|-------------------------------------------------------------------------------------------------------------------------------------------------------------------------------------------------------------------------------------------------------------------------------------------------------------------------------------------------------------------------------------------------------------------------------------------------------------------------------------------------------------------------------------------------------------------------------------------------------------------------------------------------------------------------------------------------------------------------------------------------------------------------------------------------------------------------------------------------------------------------------------------------------------------------------------------------------------------------------------------------------------------------------------------------------------------------------------------------------------------------------------------------------|--------------------------------------------------------------------------------------------------------------------------------------------------------------------------------------------------------------------------------------------------------------------------------------------------------------------------------------------------------------------------------------------------------------------------------------------------------------------------------------------------------------------------------------------------------------------------------------------------------------------------------------------------------------------------------------------------------------------------------------------------------------------------------------------------------------------------------------------------------------------------------------------------------------------------------------------------------------------------------------------------------------------------------------------------------------------------------------------------------------------------------------------------------|--------------------------------------------------------------------------------------------------------------------------------------------------------------------------------------------------------------------------------------------------------------------------------------------------------------------------------------------------------------------------------------------------------------------------------------------------------------------------------------------------------------------------------------------------------------------------------------------------------------------------------------------------------------------------------------------------------------------------------------------------------------------------------------------------------------------------------------------------------------------------------------------------------------------------------------------------------------------------------------------------------------------------------------------------------------------------------------------------------------------------------------------------|--------------------------------------------------------------------------------------------------------------------------------------------------------------------------------------------------------------------------------------------------------------------------------------------------------------------------------------------------------------------------------------------------------------------------------------------------------------------------------------------------------------------------------------------------------------------------------------------------------------------------------------------------------------------------------------------------------------------------------------------------------------------------------------------------------------------------------------------------------------------------------------------------------------------------------------------------------------------------------------------------------------------------------------------------------------------------------------------------------------------------------------------------|
| 22(0), 31(0), 34(1), 43(1), 49(0), 57(0), 69(0), 75(1), 78(0), 84(0), 90(0), 98(1), 98(0), 107(3), 116(1), 117(0), 119(0), 138(3), 140(3), 147(1), 156(1), 166(1), 216(7), 284(17), 295(14), 300(6), 308(7), 321(27), 330(1), 333(1), 337(23), 338(3), 350(11), 374(32), 393(3), 402(29), 409(16), 430(8), 437(3), 445(30), 446(8), 459(19), 475(6), 487(10), 504(6), 513(40), 516(9), 541(9), 544(28), 555(1), 606(0), 608(0), 613(2), 615(0), 616(1), 620(0), 673(123), 808(77), 811(72), 814(151), 814(28), 829(11), 832(58), 833(28), 838(2), 841(13), 847(0), 849(0), 850(0), 850(1), 852(5), 854(3), 902(0), 910(1), 913(1), 917(3), 920(2), 925(1), 1028(10), 1032(7), 1033(10), 1034(11), 1037(13), 1040(5), 1079(0), 1080(0), 1082(3), 1083(2), 1084(0), 1085(1), 1149(0), 1153(2), 1153(1), 1277(0), 1278(0), 1279(0), 1337(163), 1417(2), 1420(6), 1425(3), 1428(1), 1428(1), 1431(0), 1471(2), 1472(2), 1473(2), 1477(4), 1480(2), 1484(2), 1905(815), 1922(332), 2003(837), 2022(1338), 2074(560), 3270(0), 3277(1), 3278(0), 3278(0), 3279(0), 3283(0), 3288(1), 3291(1), 3291(0), 3292(1), 3293(0), 3296(0), 3303(0), 3305(0), 3308(0) | 20(0), 28(0), 29(0), 41(0), 47(0), 56(0), 69(0), 75(1), 77(0), 82(0), 89(0), 96(1), 98(0), 106(2), 115(1), 116(0), 118(0), 136(2), 138(4), 145(1), 154(1), 165(1), 215(7), 277(15), 287(13), 295(7), 302(6), 315(22), 324(2), 327(1), 332(13), 334(9), 347(14), 372(37), 390(3), 398(22), 405(24), 426(7), 432(2), 441(36), 443(4), 454(24), 472(5), 483(12), 505(1), 511(43), 514(4), 541(9), 544(33), 554(1), 598(0), 602(0), 605(3), 608(0), 610(1), 615(0), 670(131), 792(32), 799(27), 804(54), 805(132), 812(47), 818(80), 820(31), 823(15), 827(33), 844(0), 845(0), 847(0), 847(0), 848(3), 852(2), 883(3), 888(0), 897(1), 903(2), 905(2), 907(1), 1027(10), 1030(8), 1032(10), 1034(11), 1036(14), 1041(5), 1078(0), 1080(0), 1080(3), 1083(1), 1083(1), 1084(1), 1148(0), 1153(1), 1153(0), 1277(0), 1278(0), 1278(0), 1362(169), 1417(2), 1420(7), 1424(3), 1427(1), 1428(0), 1431(0), 1470(2), 1471(2), 1473(2), 1478(4), 1480(2), 1484(2), 1920(781), 1936(290), 2007(866), 2028(1266), 2081(543), 3270(0), 3276(0), 3279(0), 3280(0), 3281(0), 3284(0), 3289(1), 3292(1), 3293(1), 3294(0), 3295(0), 3297(0), 3305(0), 3306(1), 3311(0) | 21(0), 39(0), 41(0), 47(0), 54(1), 57(0), 64(0), 72(0), 78(1), 82(0), 87(0), 95(0), 98(1), 103(1), 105(2), 110(1), 114(1), 129(3), 138(0), 147(3), 156(1), 164(1), 213(1), 267(11), 272(5), 286(17), 296(4), 302(17), 311(2), 313(3), 321(21), 325(6), 332(4), 354(15), 369(18), 382(3), 388(5), 417(4), 421(14), 427(20), 436(15), 442(18), 446(13), 457(1), 480(16), 484(19), 493(43), 511(24), 517(5), 521(6), 576(1), 577(0), 580(0), 584(2), 586(0), 592(0), 620(148), 763(66), 774(33), 779(84), 783(106), 786(13), 791(12), 793(7), 795(38), 798(38), 814(0), 817(5), 818(2), 818(1), 819(0), 821(5), 855(1), 856(0), 859(1), 868(0), 870(1), 879(1), 990(14), 991(8), 994(10), 995(10), 995(9), 999(3), 1040(1), 1042(2), 1044(0), 1045(1), 1047(0), 1048(0), 1103(1), 1104(4), 1106(2), 1224(0), 1227(0), 1228(0), 1335(117), 1355(1), 1357(2), 1360(0), 1362(2), 1364(6), 1364(0), 1406(1), 1407(1), 1411(2), 1412(3), 1412(2), 1418(2), 1786(659), 1799(306), 1889(1059), 1895(416), 1944(781), 3162(1), 3169(0), 3170(0), 3170(0), 3171(0), 3174(1), 3180(1), 3180(0), 3183(0), 3183(0), 3184(0), 3189(1), 3193(0), 3194(0), 3197(0) | 21(0), 36(0), 39(0), 47(0), 52(1), 56(0), 63(0), 72(0), 78(1), 81(0), 86(1), 93(0), 97(1), 102(2), 103(1), 107(1), 113(1), 126(2), 134(0), 144(4), 153(1), 162(1), 211(0), 258(10), 263(5), 281(18), 290(6), 298(12), 305(2), 307(4), 316(20), 320(6), 328(4), 351(14), 366(18), 377(2), 386(5), 413(5), 418(11), 424(20), 432(12), 437(24), 440(15), 451(1), 477(16), 482(20), 493(41), 509(27), 518(5), 521(6), 569(1), 572(0), 574(0), 578(2), 580(0), 586(0), 613(159), 749(41), 757(22), 771(43), 773(41), 774(76), 778(6), 780(19), 783(101), 787(61), 812(1), 812(8), 815(1), 815(0), 816(0), 818(3), 833(0), 843(0), 844(0), 853(0), 858(0), 861(1), 989(15), 991(7), 993(10), 994(7), 994(13), 999(4), 1039(1), 1041(2), 1043(0), 1045(1), 1047(1), 1047(0), 1103(0), 1104(3), 1107(1), 1224(0), 1227(0), 1227(0), 1354(1), 1358(0), 1359(6), 1362(21), 1362(2), 1363(1), 1368(99), 1406(1), 1407(1), 1411(3), 1412(4), 1413(3), 1418(2), 1797(652), 1810(270), 1894(1007), 1901(438), 1948(759), 3162(1), 3170(0), 3170(0), 3171(0), 3173(0), 3176(0), 3182(0), 3182(0), 3185(0), 3185(0), 3186(0), 3190(1), 3196(0), 3196(0), 3199(0) |
